# Supplementary material for: Enhancing SO 3 Hydrolysis and Nucleation: The Role of Formic Sulfuric Anhydride
Source: Copernicus journal article supplement (doi:10.5194/egusphere-2024-3275), 2024-12-11
Supplement: Supplementary file 1 [file egusphere-2024-3275-supplement.zip]

# Supporting information

-for-

## Enhancing SO<sub>3</sub> Hydrolysis and Nucleation: The Role of Formic Sulfuric Anhydride

Rui Wang<sup>a</sup>, Rongrong Li<sup>a</sup>, Shasha Chen<sup>a</sup>, Ruxue Mu<sup>a</sup>, Changming Zhang<sup>b</sup>, Xiaohui Ma<sup>c,\*</sup>,  
Majid Khan<sup>d</sup>, Tianlei Zhang<sup>a,\*</sup>

<sup>a</sup> Shaanxi Key Laboratory of Catalysis, School of Chemical & Environment Science, Shaanxi University of Technology, Hanzhong, Shaanxi 723001, P. R. China

<sup>b</sup> Shaanxi Key Laboratory of Catalysis, School of Mechanical Engineering, Shaanxi University of Technology, Hanzhong, Shaanxi 723001, P. R. China

<sup>c</sup> School of Environmental Engineering, Henan University of Technology, Zhengzhou, Henan 450001, China

<sup>d</sup> College of Chemistry, Fuzhou University, 350116, Fuzhou, China

| S.NO  | Caption                                                                                                                                                                                                                                                                                                                                                                                                                                                                                                                                                                                |
|-------|----------------------------------------------------------------------------------------------------------------------------------------------------------------------------------------------------------------------------------------------------------------------------------------------------------------------------------------------------------------------------------------------------------------------------------------------------------------------------------------------------------------------------------------------------------------------------------------|
| S1    | <b>Fig. S1.</b> BOMD simulation trajectories and snapshots of the FSA-assisted SO <sub>3</sub> hydrolysis reaction                                                                                                                                                                                                                                                                                                                                                                                                                                                                     |
| S2    | <b>Fig. S2.</b> Energy diagrams for H <sub>2</sub> SO <sub>4</sub> formation from the SO <sub>3</sub> + H <sub>2</sub> O reaction with and without H <sub>2</sub> O at the CCSD(T)-F12/cc-pVDZ-F12/M06-2X/6-311++G(2df,2pd) level of theory                                                                                                                                                                                                                                                                                                                                            |
| S3    | <b>Fig. S3.</b> Energy diagrams for SO <sub>3</sub> hydrolysis with HNO <sub>3</sub> (a), HCOOH (b) and H <sub>2</sub> SO <sub>4</sub> (c) at the CCSD(T)-F12/cc-pVDZ-F12/M06-2X/6-311+G(2df,2pd) level of theory                                                                                                                                                                                                                                                                                                                                                                      |
| S4-S5 | <b>Table S1.</b> Relative energies ( $\Delta E$ and $\Delta(E + ZPE)$ ), enthalpies ( $\Delta H$ ), entropy (S) and free energies ( $\Delta G$ ) for reactants, intermediates, transition states, and products in the SO <sub>3</sub> + H <sub>2</sub> SO <sub>4</sub> reaction, with and without H <sub>2</sub> O, and the SO <sub>3</sub> hydrolysis reaction, with and without H <sub>2</sub> O and H <sub>2</sub> SO <sub>4</sub> (units: kcal·mol <sup>-1</sup> for $\Delta E$ , $\Delta(E + ZPE)$ , $\Delta H$ , and $\Delta G$ ; kcal·mol <sup>-1</sup> ·K <sup>-1</sup> for S) |
| S6    | <b>Fig. S4.</b> ESP-mapped van der Waals surface of HNO <sub>3</sub> (NA), H <sub>2</sub> SO <sub>4</sub> (SA), HCOOH (FA), (COOH) <sub>2</sub> (OA) and HCOOSO <sub>3</sub> H (FSA)                                                                                                                                                                                                                                                                                                                                                                                                   |
| S7    | <b>Table S2.</b> Equilibrium constants (molecules·cm <sup>-3</sup> ) for FSA···H <sub>2</sub> O, SO <sub>3</sub> ···H <sub>2</sub> O and (H <sub>2</sub> O) <sub>2</sub> within the temperature range of 280-320 K                                                                                                                                                                                                                                                                                                                                                                     |
| S8    | <b>Table S3.</b> Concentrations (molecules·cm <sup>-3</sup> ) of H <sub>2</sub> O, FSA···H <sub>2</sub> O and SO <sub>3</sub> ···H <sub>2</sub> O within the temperature range of 280-320 K <sup>a</sup>                                                                                                                                                                                                                                                                                                                                                                               |
| S9    | <b>Part 1.</b> Calculations details of high-pressure-limit (HPL) rate constants                                                                                                                                                                                                                                                                                                                                                                                                                                                                                                        |
| S10   | <b>Table S4.</b> High-pressure limiting rate constants (cm <sup>3</sup> ·molecules <sup>-1</sup> ·s <sup>-1</sup> ) for the reactants to pre-reactive complex process in SO <sub>3</sub> hydrolysis with and without <i>X</i> ( <i>X</i> = H <sub>2</sub> O, NH <sub>3</sub> , HCOOH, (COOH) <sub>2</sub> , HNO <sub>3</sub> , H <sub>2</sub> SO <sub>4</sub> , H <sub>2</sub> SO <sub>4</sub> ···H <sub>2</sub> O and (H <sub>2</sub> SO <sub>4</sub> ) <sub>2</sub> ), calculated using the master equation within the temperature range of 280-320 K                                |

\* Corresponding authors. Tel: +86-0916-2641083, Fax: +86-0916-2641083.

e-mail: ztianlei88@163.com (T. L Zhang) and mxhsdu@163.com (X. H Ma)

‡ These authors contributed equally to this work.

|         |                                                                                                                                                                                                                                                                                                                                                                                                                                                                                                                                                                 |
|---------|-----------------------------------------------------------------------------------------------------------------------------------------------------------------------------------------------------------------------------------------------------------------------------------------------------------------------------------------------------------------------------------------------------------------------------------------------------------------------------------------------------------------------------------------------------------------|
| S11-S12 | <b>Part 2.</b> Details of Master Equation Solver for Multi-Energy Well Reactions                                                                                                                                                                                                                                                                                                                                                                                                                                                                                |
| S13     | <b>Table S5.</b> Rate ratios for SO <sub>3</sub> hydrolysis with FSA compared to H <sub>2</sub> O and <i>X</i> ( <i>X</i> = HCOOH, (COOH) <sub>2</sub> , HNO <sub>3</sub> and H <sub>2</sub> SO <sub>4</sub> ) within the temperature range of 280-320 K                                                                                                                                                                                                                                                                                                        |
| ,S14    | <b>Fig. S5.</b> Z coordinates of SO <sub>3</sub> (A), FSA (B) and SO <sub>3</sub> -FSA complex (C) as the function of simulation time, along with (a) the water density profile and (b) a pie chart showing occurrence percentages (c) at the air-water interface and in the water phase                                                                                                                                                                                                                                                                        |
| S15     | <b>Fig. S6.</b> Snapshot structures from BOMD simulations of the FSA reaction at the air-water interface. White, red, yellow and blue spheres represent H, O, S, and C atoms, respectively                                                                                                                                                                                                                                                                                                                                                                      |
| S16     | <b>Fig. S7.</b> BOMD simulations of HSO <sub>4</sub> <sup>-</sup> •••FSA•••H <sub>3</sub> O <sup>+</sup> ion pair formation from SO <sub>3</sub> hydrolysis with FSA at the air-water interface (Top panel: Snapshot structures showing the formation of HSO <sub>4</sub> <sup>-</sup> •••FSA•••H <sub>3</sub> O <sup>+</sup> ion pair. Lower panel: Time evolution of key bond distances (S-O1, O5-H3, and O1-H2) involved in the mechanism.)                                                                                                                  |
| S17     | <b>Fig. S8.</b> Snapshots of nucleation simulation of FSA, SA and A using the VDW representation, with N <sub>2</sub> and O <sub>2</sub> shown using the line drawing method at 278.15 K                                                                                                                                                                                                                                                                                                                                                                        |
| S18     | <b>Fig. S9.</b> Snapshots of nucleation simulation of FSA, SA and A using the VDW representation, with N <sub>2</sub> and O <sub>2</sub> shown using the line drawing method at 298.15 K                                                                                                                                                                                                                                                                                                                                                                        |
| S19     | <b>Fig. S10.</b> Most stable configurations of FSA-SA-A-based clusters identified at the M06-2X/6-311++G(2df,2pd) level of theory. Hydrogen bond lengths are given in Å.                                                                                                                                                                                                                                                                                                                                                                                        |
| S20-S21 | <b>Table S6.</b> Gibbs free energy change $\Delta G$ (kcal·mol <sup>-1</sup> ) for the formation of all clusters at 1 atm and temperatures of 298.15, 278.15, and 258.15K                                                                                                                                                                                                                                                                                                                                                                                       |
| S22-S23 | <b>Table S7.</b> Evaporation rates ( $\gamma$ , s <sup>-1</sup> ) of the studied clusters at 298.15, 278.15, and 258.15K                                                                                                                                                                                                                                                                                                                                                                                                                                        |
| S24-S25 | <b>Table S8.</b> Collision coefficients ( $\beta$ , cm <sup>3</sup> s <sup>-1</sup> ) for each cluster                                                                                                                                                                                                                                                                                                                                                                                                                                                          |
| S26     | <b>Table S9.</b> Total evaporation coefficients ( $\sum\gamma$ , s <sup>-1</sup> ) for each cluster                                                                                                                                                                                                                                                                                                                                                                                                                                                             |
| S27-S28 | <b>Table S10.</b> Ratios ( $\beta C/\sum\gamma$ ) of monomer collisions to evaporation coefficients for each FSA-involved cluster in this study. [SA] = 1.0 × 10 <sup>7</sup> molecules·cm <sup>-3</sup> , [A] = 1.0 × 10 <sup>10</sup> molecules·cm <sup>-3</sup> , [FSA] = 1.0 × 10 <sup>6</sup> molecules·cm <sup>-3</sup>                                                                                                                                                                                                                                   |
| S29     | <b>Table S11.</b> Formation rate ( $J$ , s <sup>-1</sup> ) of FSA at $T$ = 298.15 K with [SA] = 10 <sup>4</sup> - 10 <sup>8</sup> molecules·cm <sup>-3</sup> , [A] = 10 <sup>7</sup> - 10 <sup>11</sup> molecules·cm <sup>-3</sup> , and [FSA] = 10 <sup>3</sup> - 10 <sup>7</sup> molecules·cm <sup>-3</sup> .                                                                                                                                                                                                                                                 |
| S30     | <b>Table S12.</b> Formation rate $J$ (s <sup>-1</sup> ) of FSA at $T$ = 278.15 K with [SA] = 10 <sup>4</sup> - 10 <sup>8</sup> molecules·cm <sup>-3</sup> , [A] = 10 <sup>7</sup> - 10 <sup>11</sup> molecules·cm <sup>-3</sup> , and [FSA] = 10 <sup>3</sup> - 10 <sup>7</sup> molecules·cm <sup>-3</sup>                                                                                                                                                                                                                                                      |
| S31     | <b>Table S13.</b> Formation rate $J$ (s <sup>-1</sup> ) of FSA at $T$ = 258.15 K with [SA] = 10 <sup>4</sup> - 10 <sup>8</sup> molecules·cm <sup>-3</sup> , [A] = 10 <sup>7</sup> - 10 <sup>11</sup> molecules·cm <sup>-3</sup> , and [FSA] = 10 <sup>3</sup> - 10 <sup>7</sup> molecules·cm <sup>-3</sup>                                                                                                                                                                                                                                                      |
| S32     | <b>Fig. S11.</b> (a) Cluster formation rate ( $J$ , cm <sup>-3</sup> s <sup>-1</sup> ) and (b) enhancement factor ( $R$ ) with [SA] = 10 <sup>4</sup> molecules·cm <sup>-3</sup> , [A] = 10 <sup>7</sup> molecules·cm <sup>-3</sup> at three temperatures, (c) Cluster formation rate ( $J$ , cm <sup>-3</sup> s <sup>-1</sup> ) and (d) enhancement factor ( $R$ ) with [SA] = 10 <sup>8</sup> molecules·cm <sup>-3</sup> , [A] = 10 <sup>11</sup> molecules·cm <sup>-3</sup> at three temperatures (black: 258.15 K, red: 278.15 K, blue: 298.15 K)           |
| S33     | <b>Fig. S12.</b> (a) Cluster formation rate ( $J$ , cm <sup>-3</sup> s <sup>-1</sup> ) and (b) enhancement factor ( $R$ ) as a function of [A] with [FSA] = 10 <sup>6</sup> molecules·cm <sup>-3</sup> and five different [SA] concentrations (black: [SA] = 10 <sup>4</sup> molecules·cm <sup>-3</sup> , red: [SA] = 10 <sup>5</sup> molecules·cm <sup>-3</sup> , blue: [SA] = 10 <sup>6</sup> molecules·cm <sup>-3</sup> , green: [SA] = 10 <sup>7</sup> molecules·cm <sup>-3</sup> , purple: [SA] = 10 <sup>8</sup> molecules·cm <sup>-3</sup> ) at 258.15 K |
| S34     | <b>Fig. S13.</b> (a) Cluster formation rate ( $J$ , cm <sup>-3</sup> s <sup>-1</sup> ) and (b) enhancement factor ( $R$ ) as a function of [A] with [FSA] = 10 <sup>6</sup> molecules·cm <sup>-3</sup> and five different [SA] concentrations (black: [SA] = 10 <sup>4</sup> molecules·cm <sup>-3</sup> ,                                                                                                                                                                                                                                                       |

|         |                                                                                                                                                                                                                                                                                                                                                                                            |
|---------|--------------------------------------------------------------------------------------------------------------------------------------------------------------------------------------------------------------------------------------------------------------------------------------------------------------------------------------------------------------------------------------------|
|         | red: $[SA] = 10^5 \text{ molecules}\cdot\text{cm}^{-3}$ , blue: $[SA] = 10^6 \text{ molecules}\cdot\text{cm}^{-3}$ , green: $[SA] = 10^7 \text{ molecules}\cdot\text{cm}^{-3}$ , purple: $[SA] = 10^8 \text{ molecules}\cdot\text{cm}^{-3}$ ) at 298.15 K                                                                                                                                  |
| S35     | <b>Fig. S14.</b> Main pathways of clusters growth under conditions of $T = 258.15 \text{ K}$ , $[SA] = 10^6 \text{ molecules}\cdot\text{cm}^{-3}$ , $[A] = 10^9 \text{ molecules}\cdot\text{cm}^{-3}$ , and $[FSA] = 10^3\text{-}10^7 \text{ molecules}\cdot\text{cm}^{-3}$ . Blue and orange fluxes represent the pathways of the SA-A-based and SA-A-FSA-based cluster, respectively     |
| S36     | <b>Fig. S15.</b> Main pathways of clusters growth under conditions of $T = 298.15 \text{ K}$ , $[SA] = 10^6 \text{ molecules}\cdot\text{cm}^{-3}$ , $[A] = 10^9 \text{ molecules}\cdot\text{cm}^{-3}$ , and $[FSA] = 10^3\text{-}10^7 \text{ molecules}\cdot\text{cm}^{-3}$ . The blue and orange fluxes represent the pathways of the SA-A-based and SA-A-FSA-based cluster, respectively |
| S37-S55 | <b>Table S14.</b> Cartesian coordinates of all molecules and clusters in this study                                                                                                                                                                                                                                                                                                        |

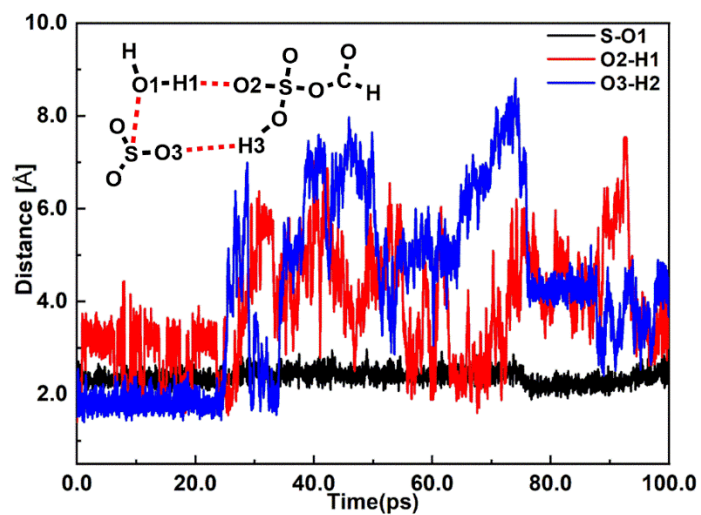

16

17 **Fig. S1.** BOMD simulation trajectories and snapshots of the FSA-assisted  $\text{SO}_3$  hydrolysis reaction

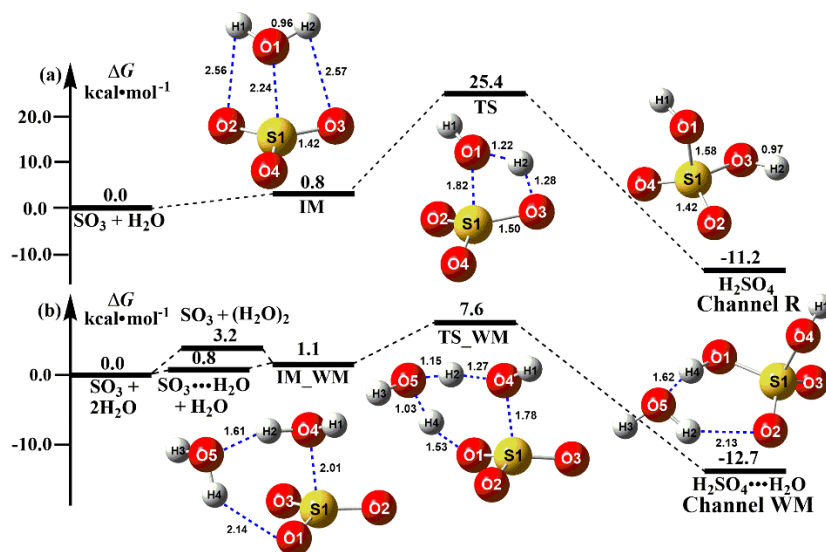

**Fig. S2.** Energy diagrams for H<sub>2</sub>SO<sub>4</sub> formation from the SO<sub>3</sub> + H<sub>2</sub>O reaction with and without H<sub>2</sub>O at the CCSD(T)-F12/cc-pVDZ-F12//M06-2X/6-311++G(2df,2pd) level of theory

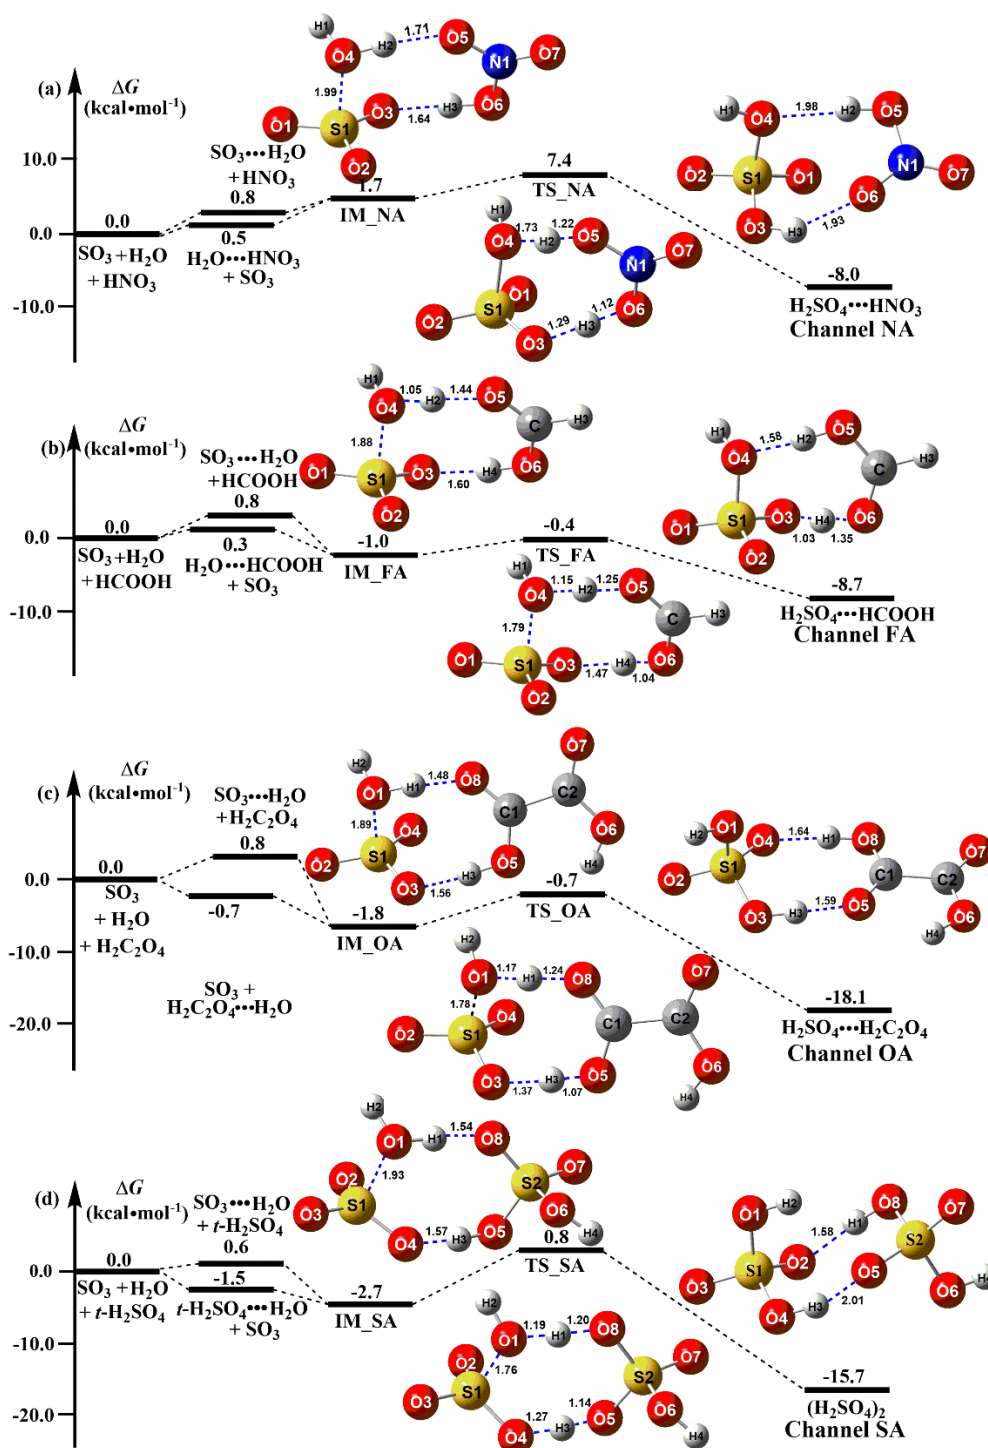

**Fig. S3.** Energy diagrams for SO $_3$  hydrolysis with HNO $_3$  (a), HCOOH (b) and H $_2$ SO $_4$  (c) at the CCSD(T)-F12/cc-pVDZ-F12//M06-2X/6-311+G(2*df*,2*pd*) level of theory

**Table S1.** Relative energies ( $\Delta E$  and  $\Delta(E + \text{ZPE})$ ), enthalpies ( $\Delta H$ ), entropy (S) and free energies ( $\Delta G$ ) for reactants, intermediates, transition states, and products in the  $\text{SO}_3 + \text{H}_2\text{SO}_4$  reaction, with and without  $\text{H}_2\text{O}$ , and the  $\text{SO}_3$  hydrolysis reaction, with and without  $\text{H}_2\text{O}$  and  $\text{H}_2\text{SO}_4$  (units:  $\text{kcal}\cdot\text{mol}^{-1}$  for  $\Delta E$ ,  $\Delta(E + \text{ZPE})$ ,  $\Delta H$ , and  $\Delta G$ ;  $\text{kcal}\cdot\text{mol}^{-1}\cdot\text{K}^{-1}$  for S)

| <i>Species</i>                                                         | ZPE  | $\Delta E$ | S     | $\Delta G$                                    | $\Delta(E+\text{ZPE})$     | $\Delta H$ |
|------------------------------------------------------------------------|------|------------|-------|-----------------------------------------------|----------------------------|------------|
| $\text{SO}_3 + \text{H}_2\text{O} + \text{FSA}$                        | 52.9 | 0.0        | 188.3 | 0.0                                           | 0.0                        | 0.0        |
| $\text{SO}_3\cdots\text{H}_2\text{O} + \text{FSA}$                     | 24.0 | -9.4       | 77.9  | 0.8(0.33) <sup>a</sup>                        | -7.0                       | -7.6       |
| $\text{SO}_3 + \text{FSA}\cdots\text{H}_2\text{O}$                     | 47.1 | -12.7      | 95.6  | -1.8                                          | -10.4                      | -11.2      |
| IM                                                                     | 56.9 | -26.4      | 115.3 | -2.0                                          | -22.4                      | -23.7      |
| TS                                                                     | 53.7 | -21.6      | 110.4 | 0.5                                           | -20.7                      | -22.7      |
| $\text{H}_2\text{SO}_4\cdots\text{FSA}$                                | 57.4 | -37.1      | 118.1 | -12.9                                         | -32.6                      | -33.8      |
| $\text{SO}_3 + \text{H}_2\text{O}$                                     | 21.6 | 0.0        | 106.2 | 0.0                                           | 0.0                        | 0.0        |
| $\text{SO}_3\cdots\text{H}_2\text{O}$                                  | 24.0 | -9.4       | 77.9  | 0.8(0.33) <sup>a</sup><br>(0.62) <sup>b</sup> | -7.0                       | -7.6       |
| $\text{TS}_{\text{SA}}$                                                | 22.3 | 15.7       | 70.4  | 25.4 (25.7) <sup>a</sup>                      | 16.4                       | 14.7       |
| $\text{H}_2\text{SO}_4$                                                | 25.2 | -23.6      | 71.8  | -11.2(-10.72) <sup>a</sup>                    | -20.0                      | -21.4      |
| $\text{SO}_3 + \text{H}_2\text{O} + \text{H}_2\text{O}$                | 35.2 | 0.0        | 151.3 | 0.0                                           | 0.0                        | 0.0        |
| $\text{SO}_3\cdots\text{H}_2\text{O} + \text{H}_2\text{O}$             | 24.0 | -9.4       | 77.9  | 0.8(0.33) <sup>a</sup><br>(0.62) <sup>b</sup> | -7.0                       | -7.6       |
| $\text{SO}_3 + (\text{H}_2\text{O})_2$                                 | 29.5 | -5.0       | 68.6  | 3.2(2.68) <sup>a</sup>                        | -2.7                       | -3.3       |
| $\text{SO}_3\cdots(\text{H}_2\text{O})_2$                              | 40.7 | -21.6      | 87.4  | 1.1(0.8) <sup>c</sup>                         | -16.0                      | -17.9      |
| $\text{TS}_{\text{SA\_WM}}$                                            | 39.1 | -14.5      | 80.1  | 7.6(6.7) <sup>c</sup>                         | -10.6                      | -13.6      |
| $\text{H}_2\text{SO}_4\cdots\text{H}_2\text{O}$                        | 41.0 | -36.0      | 85.5  | -12.7(-11.9) <sup>c</sup>                     | -30.2                      | -32.3      |
| $\text{SO}_3 + \text{H}_2\text{O} + \text{HNO}_3$                      | 38.9 | 0.0        | 169.5 | 0.0                                           | 0.0                        | 0.0        |
| $\text{SO}_3 + \text{HNO}_3\cdots\text{H}_2\text{O}$                   | 41.0 | -8.4       | 139.4 | 0.5                                           | -7.9 (-8.1) <sup>c</sup>   | -8.4       |
| $\text{SO}_3\cdots\text{H}_2\text{O} + \text{HNO}_3$                   | 41.2 | -7.8       | 141.4 | 0.8                                           | -7.2 (-7.4) <sup>c</sup>   | -7.8       |
| IM_NA                                                                  | 42.8 | -18.1      | 103.2 | 1.7                                           | -17.1 (-17.2) <sup>c</sup> | -18.1      |
| TS_NA                                                                  | 39.9 | -15.2      | 93.6  | 7.4                                           | -13.2 (-13.5) <sup>c</sup> | -15.2      |
| $\text{H}_2\text{SO}_4\cdots\text{HNO}_3$                              | 43.4 | -28.6      | 100.6 | -8.0                                          | -27.4 (-27.8) <sup>c</sup> | -28.6      |
| $\text{SO}_3 + \text{H}_2\text{O} + \text{HCOOH}$                      | 43.2 | 0.0        | 165.5 | 0.0                                           | 0.0                        | 0.0        |
| $\text{SO}_3 + \text{HCOOH}\cdots\text{H}_2\text{O}$                   | 45.6 | -10.2      | 134.8 | 0.3                                           | -7.7                       | -8.5       |
| $\text{SO}_3\cdots\text{H}_2\text{O} + \text{HCOOH}$                   | 45.5 | -9.5       | 137.4 | 0.8                                           | -7.2                       | -7.8       |
| IM_FA                                                                  | 47.4 | -25.7      | 94.1  | -1.8(-2.0) <sup>b</sup>                       | -21.5                      | -23.1      |
| TS_FA                                                                  | 45.9 | -23.9      | 89.4  | -0.8(-1.0) <sup>b</sup>                       | -21.2                      | -23.5      |
| $\text{H}_2\text{SO}_4\cdots\text{HCOOH}$                              | 48.0 | -40.9      | 130.8 | -8.7(-8.3) <sup>b</sup>                       | -36.1                      | -37.7      |
| $\text{SO}_3 + \text{H}_2\text{O} + \text{H}_2\text{C}_2\text{O}_4$    | 52.9 | 0.0        | 181.7 | 0.0                                           | 0.0                        | 0.0        |
| $\text{SO}_3 + \text{H}_2\text{C}_2\text{O}_4\cdots\text{H}_2\text{O}$ | 55.3 | -11.8      | 150.1 | -0.7                                          | -10.6 (-11.1) <sup>d</sup> | -10.1      |
| $\text{SO}_3\cdots\text{H}_2\text{O} + \text{H}_2\text{C}_2\text{O}_4$ | 55.3 | -9.5       | 153.6 | 0.8                                           | -7.2 (-7.4) <sup>d</sup>   | -7.8       |
| IM_OA                                                                  | 57.1 | -26.3      | 109.1 | -1.8                                          | -23.3 (-23.5) <sup>d</sup> | -23.5      |
| TS_OA                                                                  | 54.7 | -23.5      | 104.5 | -0.7                                          | -23.0 (-23.5) <sup>d</sup> | -23.8      |
| $\text{H}_2\text{SO}_4\cdots\text{H}_2\text{C}_2\text{O}_4$            | 57.6 | -42.7      | 110.0 | -18.1                                         | -39.3 (-39.1) <sup>d</sup> | -39.5      |

|                                                                 |      |       |       |       |                            |       |
|-----------------------------------------------------------------|------|-------|-------|-------|----------------------------|-------|
| $\text{SO}_3 + \text{H}_2\text{O} + t\text{-H}_2\text{SO}_4$    | 46.9 | 0.0   | 177.8 | 0.0   | 0.0                        | 0.0   |
| $\text{SO}_3 + \text{H}_2\text{SO}_4 \cdots \text{H}_2\text{O}$ | 49.1 | -12.4 | 146.3 | -1.5  | -10.1 (-10.1) <sup>e</sup> | -10.9 |
| $\text{SO}_3 \cdots \text{H}_2\text{O} + \text{H}_2\text{SO}_4$ | 49.2 | -9.5  | 149.7 | 0.6   | -7.2 (-7.0) <sup>e</sup>   | -7.8  |
| IM_SA                                                           | 50.8 | -26.2 | 108.4 | -1.5  | -22.2 (-21.3) <sup>e</sup> | -23.4 |
| TS_SA                                                           | 47.5 | -20.5 | 102.1 | 2.1   | -19.9 (-19.9) <sup>e</sup> | -21.8 |
| $(\text{H}_2\text{SO}_4)_2$                                     | 51.6 | -40.6 | 105.2 | -14.3 | -35.9 (-35.4) <sup>e</sup> | -37.4 |

<sup>a</sup> The value was taken from reference (*Chem. Phys. Lett.*, **2013**, 581, 26-29.)

<sup>b</sup> The value was taken from reference (*Chem. Phys. Chem.*, **2012**, 13, 323-329.)

<sup>c</sup> The value was taken from reference (*J. Phys. Chem. A*, **2021**, 123, 3131-3141.)

<sup>d</sup> The value was taken from reference (*Atmos. Chem. Phys.*, **2019**, 19, 2833-2844.)

<sup>e</sup> The value was taken from reference (*J. Am. Chem. Soc.*, **2012**, 134, 20632-20644.)



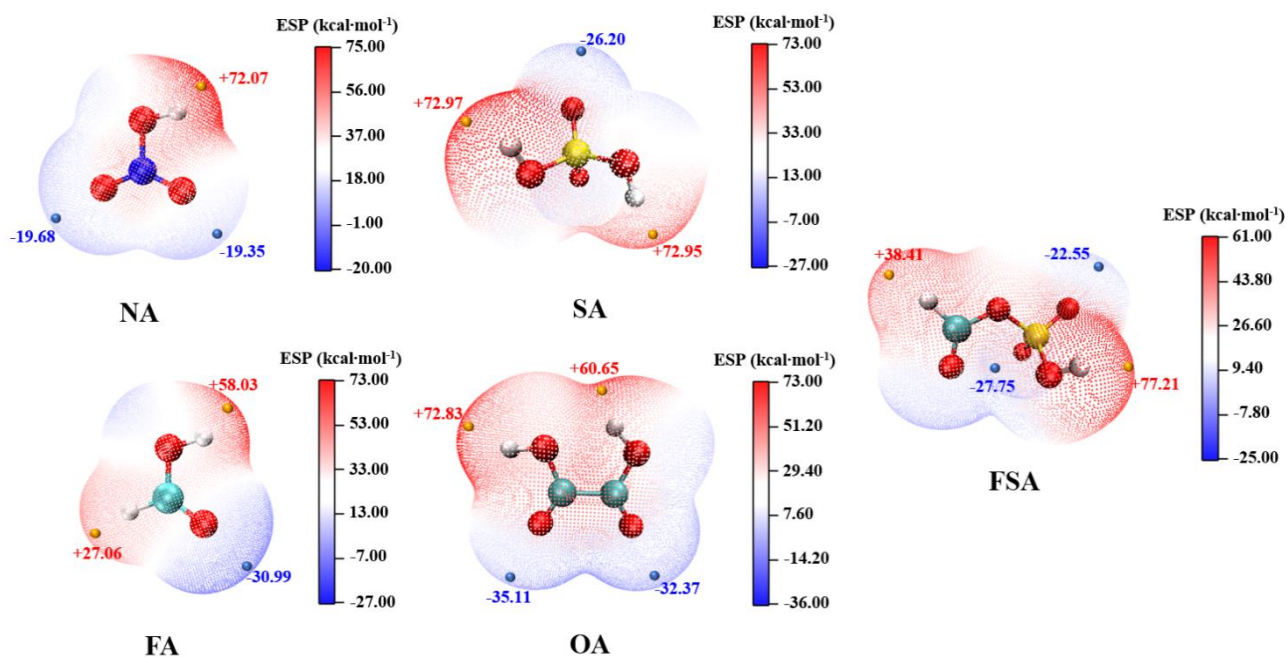

**Fig. S4.** ESP-mapped van der Waals surface of  $\text{HNO}_3$  (NA),  $\text{H}_2\text{SO}_4$  (SA),  $\text{HCOOH}$  (FA),  $(\text{COOH})_2$  (OA) and  $\text{HCOOSO}_3\text{H}$  (FSA)

37 **Table S2.** Equilibrium constants (molecules·cm<sup>-3</sup>) for FSA···H<sub>2</sub>O, SO<sub>3</sub>···H<sub>2</sub>O and (H<sub>2</sub>O)<sub>2</sub> within the temperature  
 38 range of 280-320 K

| <i>T</i> /K | FSA···H <sub>2</sub> O | SO <sub>3</sub> ···H <sub>2</sub> O                               | (H <sub>2</sub> O) <sub>2</sub>                                   | HCOOH···H <sub>2</sub> O                                          | HNO <sub>3</sub> ···H <sub>2</sub> O                              | H <sub>2</sub> C <sub>2</sub> O <sub>4</sub> ···H <sub>2</sub> O | H <sub>2</sub> SO <sub>4</sub> ···H <sub>2</sub> O                |
|-------------|------------------------|-------------------------------------------------------------------|-------------------------------------------------------------------|-------------------------------------------------------------------|-------------------------------------------------------------------|------------------------------------------------------------------|-------------------------------------------------------------------|
| 280         | $2.63 \times 10^{-18}$ | $2.45 \times 10^{-20}$                                            | $2.86 \times 10^{-22}$                                            | $3.11 \times 10^{-20}$<br>( $2.69 \times 10^{-20}$ ) <sup>b</sup> | $4.48 \times 10^{-20}$                                            | $3.07 \times 10^{-18}$                                           | $1.53 \times 10^{-18}$                                            |
| 290         | $1.37 \times 10^{-18}$ | $1.59 \times 10^{-20}$                                            | $2.42 \times 10^{-22}$                                            | $1.91 \times 10^{-20}$                                            | $2.75 \times 10^{-20}$                                            | $1.58 \times 10^{-18}$                                           | $8.12 \times 10^{-19}$                                            |
| 298         | $8.40 \times 10^{-19}$ | $1.14 \times 10^{-20}$<br>( $6.44 \times 10^{-20}$ ) <sup>a</sup> | $2.14 \times 10^{-22}$<br>( $2.34 \times 10^{-21}$ ) <sup>a</sup> | $1.33 \times 10^{-20}$<br>( $1.10 \times 10^{-20}$ ) <sup>b</sup> | $1.91 \times 10^{-20}$<br>( $4.07 \times 10^{-20}$ ) <sup>c</sup> | $9.65 \times 10^{-19}$                                           | $5.05 \times 10^{-19}$<br>( $3.88 \times 10^{-19}$ ) <sup>d</sup> |
| 300         | $7.47 \times 10^{-19}$ | $1.06 \times 10^{-20}$                                            | $2.08 \times 10^{-22}$                                            | $1.22 \times 10^{-20}$                                            | $1.75 \times 10^{-20}$                                            | $8.56 \times 10^{-19}$                                           | $4.50 \times 10^{-19}$                                            |
| 310         | $4.23 \times 10^{-19}$ | $7.25 \times 10^{-21}$                                            | $1.80 \times 10^{-22}$                                            | $7.99 \times 10^{-21}$                                            | $1.14 \times 10^{-20}$                                            | $4.83 \times 10^{-19}$                                           | $2.60 \times 10^{-19}$                                            |
| 320         | $2.49 \times 10^{-19}$ | $5.10 \times 10^{-21}$                                            | $1.58 \times 10^{-22}$                                            | $5.40 \times 10^{-21}$<br>( $4.24 \times 10^{-21}$ ) <sup>b</sup> | $7.71 \times 10^{-21}$                                            | $2.82 \times 10^{-19}$                                           | $1.55 \times 10^{-19}$                                            |

39 <sup>a</sup> The value was taken from reference (*J. Am. Chem. Soc.*, **2012**, *134*, 20632-20644)

40 <sup>b</sup> The value was taken from reference (*ChemPhysChem.*, **2012**, *13*, 323-329)

41 <sup>c</sup> The value was taken from reference (*RSC Adv.*, **2015**, *5*, 32941-32949)

42 <sup>d</sup> The value was taken from reference (*J. Phys. Chem. A*, **2021**, *125*, 2642-2652)

43 **Table S3.** Concentrations (molecules·cm<sup>-3</sup>) of H<sub>2</sub>O, FSA···H<sub>2</sub>O and SO<sub>3</sub>···H<sub>2</sub>O within the temperature range of 280-  
 44 320 K<sup>a</sup>

| Catalysts                           | RH                  | 280 K                 | 290 K                 | 298 K                 | 300 K                 | 310 K                 | 320 K                 |
|-------------------------------------|---------------------|-----------------------|-----------------------|-----------------------|-----------------------|-----------------------|-----------------------|
| H <sub>2</sub> O                    | 20%RH <sup>b</sup>  | $5.16 \times 10^{16}$ | $9.60 \times 10^{16}$ | $1.50 \times 10^{17}$ | $1.72 \times 10^{17}$ | $2.92 \times 10^{17}$ | $4.70 \times 10^{17}$ |
|                                     | 40%RH <sup>b</sup>  | $1.03 \times 10^{17}$ | $1.91 \times 10^{17}$ | $3.10 \times 10^{17}$ | $3.43 \times 10^{17}$ | $5.84 \times 10^{17}$ | $9.40 \times 10^{17}$ |
|                                     | 60%RH <sup>b</sup>  | $1.55 \times 10^{17}$ | $2.87 \times 10^{17}$ | $4.50 \times 10^{17}$ | $5.15 \times 10^{17}$ | $8.77 \times 10^{17}$ | $1.41 \times 10^{18}$ |
|                                     | 80%RH <sup>b</sup>  | $2.07 \times 10^{17}$ | $3.82 \times 10^{17}$ | $6.20 \times 10^{17}$ | $6.86 \times 10^{17}$ | $1.17 \times 10^{18}$ | $1.88 \times 10^{18}$ |
|                                     | 100%RH <sup>b</sup> | $2.58 \times 10^{17}$ | $4.78 \times 10^{17}$ | $7.70 \times 10^{17}$ | $8.58 \times 10^{17}$ | $1.46 \times 10^{18}$ | $2.35 \times 10^{18}$ |
| FSA···H <sub>2</sub> O              | 20%RH <sup>b</sup>  | $1.36 \times 10^6$    | $1.32 \times 10^6$    | $1.26 \times 10^6$    | $1.28 \times 10^6$    | $1.24 \times 10^6$    | $1.17 \times 10^6$    |
|                                     | 40%RH <sup>b</sup>  | $2.71 \times 10^6$    | $2.62 \times 10^6$    | $2.60 \times 10^6$    | $2.56 \times 10^6$    | $2.47 \times 10^6$    | $2.34 \times 10^6$    |
|                                     | 60%RH <sup>b</sup>  | $4.08 \times 10^6$    | $3.94 \times 10^6$    | $3.78 \times 10^6$    | $3.85 \times 10^6$    | $3.71 \times 10^6$    | $3.51 \times 10^6$    |
|                                     | 80%RH <sup>b</sup>  | $5.45 \times 10^6$    | $5.24 \times 10^6$    | $5.21 \times 10^6$    | $5.12 \times 10^6$    | $4.95 \times 10^6$    | $4.69 \times 10^6$    |
|                                     | 100%RH <sup>b</sup> | $6.80 \times 10^6$    | $6.55 \times 10^6$    | $6.47 \times 10^6$    | $6.41 \times 10^6$    | $6.18 \times 10^6$    | $5.86 \times 10^6$    |
| SO <sub>3</sub> ···H <sub>2</sub> O | 20%RH <sup>b</sup>  | 1.76                  | 2.09                  | 2.34                  | 2.47                  | 2.84                  | 3.19                  |
|                                     | 40%RH <sup>b</sup>  | 3.52                  | 4.17                  | 4.83                  | 4.93                  | 5.69                  | 6.38                  |
|                                     | 60%RH <sup>b</sup>  | 5.30                  | 6.26                  | 7.01                  | 7.40                  | 8.54                  | 9.56                  |
|                                     | 80%RH <sup>b</sup>  | 7.08                  | 8.33                  | 9.66                  | 9.86                  | 11.4                  | 12.8                  |
|                                     | 100%RH <sup>b</sup> | 8.82                  | 1.04                  | 1.20                  | 12.3                  | 14.2                  | 15.9                  |

45 <sup>a</sup> All of the equilibrium constants were calculated by using energies computed at CCSD(T)-F12a/cc-pVDZ-F12//M06-2X/6-  
 46 311++G(2df,2pd) level and partition functions obtained at the M06-2X/6-311++G(2df,2pd) level.

47 <sup>b</sup> The values are reported from reference (*J. Phys. Chem. A*, **2013**, *117*, 10381-10396)

48

**Part 1.** Calculations details of high-pressure-limit (HPL) rate constants

The VRC-VTST calculations were carried out with the potential surface obtained by using CCSD(T)-F12/cc-pVDZ-F12//M06-2X/6-311+G(2df,2pd), and were performed by variationally minimizing the rate constant with respect to the distance  $s$  between pivot points and with respect to the location of the pivot points. Specifically, using two pivot points produces a single-faceted dividing surface for the hydrolysis of  $\text{SO}_3$  with  $X$  ( $X = \text{H}_2\text{O}$ ,  $\text{HCOOH}$ ,  $\text{HNO}_3$  and  $\text{H}_2\text{SO}_4$ ). Such as, using two pivot points produces a single-faceted dividing surface for the reaction of  $\text{FSA} \cdots \text{H}_2\text{O} + \text{SO}_3$ . One pivot point is located at a distance  $d$  from the center of mass (COM) of  $\text{FSA} \cdots \text{H}_2\text{O}$ , where the vector connecting the pivot point with  $\text{SO}_3 \cdots \text{H}_2\text{O}$ 's COM is perpendicular to the  $\text{SO}_3$  plane, and the other pivot point is located at a distance  $d$  from the COM of catalyst  $\text{FSA} \cdots \text{H}_2\text{O}$ , where the vector connecting the pivot point with catalyst  $\text{FSA}$ 's COM is perpendicular to catalyst  $\text{FSA} \cdots \text{H}_2\text{O}$  plane. The lengths of these vectors are fixed successively at 0.2 Å. The reaction coordinate  $s$  is the distance between a pivot point on one reactant and a pivot point on the other reactant. The distance  $s$  between pivot points is varied from 2.5 to 8.0 Å for  $\text{FSA} \cdots \text{H}_2\text{O} + \text{SO}_3$  in each case with a 0.2 Å grid increment. The details of the VRC-VTST calculations can be seen in the supporting information of reference.<sup>1</sup>

**References:**

- (1) Bao, J. L.; Zhang, X.; Truhlar, D. G. Barrierless association of  $\text{CF}_2$  and dissociation of  $\text{C}_2\text{F}_4$  by variational transition-state theory and system-specific quantum Rice-Ramsperger-Kassel theory. *Proc. Natl. Acad. Sci. U. S. A.* **2016**, *113*, 13606-13611.

66 **Table S4.** High-pressure limiting rate constants ( $\text{cm}^3 \cdot \text{molecules}^{-1} \cdot \text{s}^{-1}$ ) for the reactants to pre-reactive complex  
67 process in  $\text{SO}_3$  hydrolysis with and without  $X$  ( $X = \text{H}_2\text{O}$ ,  $\text{NH}_3$ ,  $\text{HCOOH}$ ,  $(\text{COOH})_2$ ,  $\text{HNO}_3$ ,  $\text{H}_2\text{SO}_4$ ,  $\text{H}_2\text{SO}_4 \cdots \text{H}_2\text{O}$   
68 and  $(\text{H}_2\text{SO}_4)_2$ ), calculated using the master equation within the temperature range of 280-320 K

| $T(\text{K})$ | $\text{SO}_3 + \text{H}_2\text{O} \rightarrow \text{IM}$                                  | $\text{SO}_3 \cdots \text{H}_2\text{O} + \text{H}_2\text{O} \rightarrow \text{IM\_WM}$ | $\text{SO}_3 + \text{NH}_3 \cdots \text{H}_2\text{O} \rightarrow \text{IM\_AM}$                    |
|---------------|-------------------------------------------------------------------------------------------|----------------------------------------------------------------------------------------|----------------------------------------------------------------------------------------------------|
| 280           | $1.07 \times 10^{-10}$                                                                    | $2.17 \times 10^{-10}$                                                                 | $1.88 \times 10^{-10}$                                                                             |
| 290           | $1.09 \times 10^{-10}$                                                                    | $2.21 \times 10^{-10}$                                                                 | $1.92 \times 10^{-10}$                                                                             |
| 298           | $1.10 \times 10^{-10}$                                                                    | $2.24 \times 10^{-10}$                                                                 | $1.94 \times 10^{-10}$                                                                             |
| 300           | $1.10 \times 10^{-10}$                                                                    | $2.25 \times 10^{-10}$                                                                 | $1.95 \times 10^{-10}$                                                                             |
| 310           | $1.12 \times 10^{-10}$                                                                    | $2.28 \times 10^{-10}$                                                                 | $1.98 \times 10^{-10}$                                                                             |
| 320           | $1.14 \times 10^{-10}$                                                                    | $2.32 \times 10^{-10}$                                                                 | $2.01 \times 10^{-10}$                                                                             |
| $T(\text{K})$ | $\text{SO}_3 + \text{HNO}_3 \cdots \text{H}_2\text{O} \rightarrow \text{IM\_NA}$          | $\text{SO}_3 + \text{HCOOH} \cdots \text{H}_2\text{O} \rightarrow \text{IM\_FA}$       | $\text{SO}_3 + \text{H}_2\text{C}_2\text{O}_4 \cdots \text{H}_2\text{O} \rightarrow \text{IM\_OA}$ |
| 280           | $9.15 \times 10^{-11}$                                                                    | $1.25 \times 10^{-10}$                                                                 | $9.33 \times 10^{-11}$                                                                             |
| 290           | $9.32 \times 10^{-11}$                                                                    | $1.27 \times 10^{-10}$                                                                 | $9.50 \times 10^{-11}$                                                                             |
| 298           | $9.44 \times 10^{-11}$                                                                    | $1.29 \times 10^{-10}$                                                                 | $9.63 \times 10^{-11}$                                                                             |
| 300           | $9.47 \times 10^{-11}$                                                                    | $1.30 \times 10^{-10}$                                                                 | $9.66 \times 10^{-11}$                                                                             |
| 310           | $9.63 \times 10^{-11}$                                                                    | $1.32 \times 10^{-10}$                                                                 | $9.82 \times 10^{-11}$                                                                             |
| 320           | $9.79 \times 10^{-11}$                                                                    | $1.34 \times 10^{-10}$                                                                 | $9.98 \times 10^{-11}$                                                                             |
| $T(\text{K})$ | $\text{SO}_3 + \text{H}_2\text{SO}_4 \cdots \text{H}_2\text{O} \rightarrow \text{IM\_SA}$ | $\text{SO}_3 + \text{FSA} \cdots \text{H}_2\text{O} \rightarrow \text{IM\_FSA}$        |                                                                                                    |
| 280           | $1.06 \times 10^{-10}$                                                                    | $3.09 \times 10^{-11}$                                                                 |                                                                                                    |
| 290           | $1.07 \times 10^{-10}$                                                                    | $3.14 \times 10^{-11}$                                                                 |                                                                                                    |
| 298           | $1.09 \times 10^{-10}$                                                                    | $3.18 \times 10^{-11}$                                                                 |                                                                                                    |
| 300           | $1.09 \times 10^{-10}$                                                                    | $3.19 \times 10^{-11}$                                                                 |                                                                                                    |
| 310           | $1.11 \times 10^{-10}$                                                                    | $3.25 \times 10^{-11}$                                                                 |                                                                                                    |
| 320           | $1.13 \times 10^{-10}$                                                                    | $3.30 \times 10^{-11}$                                                                 |                                                                                                    |

69

## Part 2. Details of Master Equation Solver for Multi-Energy Well Reactions

The rate constants for  $\text{SO}_3 + \text{H}_2\text{O} \cdots X$  ( $X = \text{H}_2\text{O}$ ,  $\text{NH}_3$ ,  $\text{HCOOH}$ ,  $\text{HNO}_3$ ,  $\text{H}_2\text{C}_2\text{O}_4$ ,  $\text{H}_2\text{SO}_4$ ,  $\text{H}_2\text{SO}_4 \cdots \text{H}_2\text{O}$  and  $(\text{H}_2\text{SO}_4)_2$ ) and  $\text{SO}_3 \cdots \text{H}_2\text{O} + Y$  reactions within the temperature range of 280-320 K and the pressure range of 10-760 Torr were calculated by using the Master Equation Solver for Multi-Energy Well Reactions (MESMER).<sup>1</sup> Specifically, as for  $\text{SO}_3 + \text{H}_2\text{O} \cdots X$  and  $\text{SO}_3 \cdots \text{H}_2\text{O} + X$  reaction, the barrierless bimolecular reaction steps were evaluated by using Inverse Laplace Transform (ILT) method, whereas, the rate determining steps were obtained by employing the RRKM theory. The ILT methods<sup>2-3</sup> and RRKM theory<sup>4-5</sup> can be respectively expressed in Eq. (S1)-Eq. (S2).

$$k(E) = \frac{W(E - E_0)}{h\rho(E)} \quad (\text{S1})$$

$$k^\infty(\beta) = \frac{1}{Q(\beta)} \int_0^\infty k(E)\rho(E)\exp(-\beta E)dE \quad (\text{S2})$$

In Eq. (S1) and Eq. (S2), where  $W(E-E_0)$  is the rovibrational sum of states (SOS) at the optimized transition state (TS) geometry,  $E_0$  is the reaction threshold energy,  $h$  is Planck's constant,  $\rho(E)$  is the density of rovibrational states of the reactant, and  $Q(\beta)$  is the corresponding canonical partition function. Moreover, the electronic geometries, vibrational frequencies, and rotational constants were calculated at the M06-2X/6-311+G(2df,2pd) level and single-point energy calculations were refined at the CCSD(T)-F12/cc-pVDZ-F12 level for the modeling. The one-dimensional asymmetric Eckart potential<sup>6</sup> was used to treat the tunneling effect in the RRKM calculation. In addition, The Lennard-Jones (L-J) parameters  $\epsilon/k_B = 82$  K and  $\sigma = 3.798$  Å were used for  $\text{N}_2$ <sup>7-8</sup> while  $\epsilon/k_B = 420.08$  K and  $\sigma = 2.89$  Å were estimated for  $\text{H}_2\text{SO}_4$  and its isomer. It was noted that the hindered internal rotation.<sup>9-18</sup>

## Reference:

- (1) Glowacki, D. R.; Liang, C. H.; Morley, C.; Pilling, M. J.; Robertson, S. H. MESMER: an open-source master equation solver for multi-energy well reactions. *J. Phys. Chem. A* **2012**, *116*, 9545-9560.
- (2) Horváth, G.; Horváth, I.; Almousa, S. A.-D.; Telek, M. Numerical inverse Laplace transformation using concentrated matrix exponential distributions. *Perform. Evaluation* **2020**, *137*, 102067.
- (3) Kumar, A.; Mallick, S.; Kumar, P. Oxidation of  $\text{HOSO}^\cdot$  by  $\text{Cl}^\cdot$ : a new source of  $\text{SO}_2$  in the atmosphere? *Phys. Chem. Chem. Phys.* **2021**, *23*, 18707-18711.
- (4) Mai, T. V.-T.; Duong, M. V.; Nguyen, H. T.; Huynh, L. K. J. P. C. C. P. Ab initio kinetics of the  $\text{HOSO}_2 + {}^3\text{O}_2 \rightarrow \text{SO}_3 + \text{HO}_2$  reaction. *Phys. Chem. Chem. Phys.* **2018**, *20*, 6677-6687.
- (5) Mallick, S.; Kumar, A.; Kumar, P. Oxidation of  $\text{HOSO}$  by  $\text{NH}_2$ : A new path for the formation of an acid rain precursor. *Chem. Phys. Lett.* **2021**, *773*, 138536.
- (6) Eckart, C. The penetration of a potential barrier by electrons. *Phys. Rev. B* **1930**, *35*, 1303.
- (7) Hippler, H.; Troe, J.; Wendelken, H. J. Collisional deactivation of vibrationally highly excited polyatomic molecules. II. Direct observations for excited toluene. *J. Chem. Phys.* **1983**, *78*, 6709-6717.
- (8) Reid, R. C.; Prausnitz, J. M.; Poling, B. E. The properties of gases and liquids. **1987**.

- 103 (9) Le, X. T.; Mai, T. V.-T.; Duong, M. v.; Huynh, L. K. Kinetics of hydrogen abstraction from desflurane by OH and Cl radicals-A  
104 theoretical study. *Chem. Phys. Lett.* **2019**, 728, 142-147.
- 105 (10) Le, X. T.; Mai, T. V.-T.; Lin, K. C.; Huynh, L. K. Low temperature oxidation kinetics of biodiesel molecules: Rate rules for  
106 concerted HO<sub>2</sub> elimination from alkyl ester peroxy radicals. *J. Phys. Chem. A* **2018**, 122, 8259-8273.
- 107 (11) Mai, T. V. T.; Duong, M. v.; Nguyen, H. T.; Lin, K. C.; Huynh, L. K. Kinetics of thermal unimolecular decomposition of acetic  
108 anhydride: An integrated deterministic and stochastic model. *J. Phys. Chem. A* **2017**, 121, 3028-3036.
- 109 (12) Mai, T. V. T.; Duong, M. V.; Nguyen, H. T.; Lin, K. C.; Huynh, L. K. Ab initio chemical kinetics of the CH<sub>2</sub>OO + C<sub>2</sub>F<sub>4</sub> reaction.  
110 *Chem. Phys. Lett.* **2018**, 706, 280-284.
- 111 (13) Mai, T. V. T.; Huynh, L. K. Ab initio kinetics of the C<sub>2</sub>H<sub>2</sub> + NH<sub>2</sub> reaction: a revisited study. *Phys. Chem. Chem. Phys.* **2019**, 21,  
112 17232-17239.
- 113 (14) Mai, T. V. T.; Raghunath, P.; Le, X. T.; Huynh, L. K.; Nam, P. C.; Lin, M. C. Ab initio chemical kinetics for the HCCO + OH  
114 reaction. *Chem. Phys. Lett.* **2014**, 592, 175-181.
- 115 (15) Mai, T. V. T.; Ratkiewicz, A.; Duong, M. V.; Huynh, L. K. Direct ab initio study of the C<sub>6</sub>H<sub>6</sub> + CH<sub>3</sub>/C<sub>2</sub>H<sub>5</sub> = C<sub>6</sub>H<sub>5</sub> + CH<sub>4</sub>/C<sub>2</sub>H<sub>6</sub>  
116 reactions. *Chem. Phys. Lett.* **2016**, 646, 102-109.
- 117 (16) Mai, T. V. T.; Nguyen, H. T.; Huynh, L. K. Ab initio dynamics of hydrogen abstraction from N<sub>2</sub>H<sub>4</sub> by OH radicals: an RRKM-  
118 based master equation study. *Phys. Chem. Chem. Phys.* **2019**, 21, 23733-23741.
- 119 (17) Mai, T. V. T.; Nguyen, H. T.; Huynh, L. K. Kinetics of hydrogen abstraction from CH<sub>3</sub>SH by OH radicals: An ab initio RRKM-  
120 based master equation study. *Atmos. Environ.* **2020**, 242, 117833.
- 121 (18) Reiner, T.; Arnold, F. Laboratory investigations of gaseous sulfuric acid formation via SO<sub>3</sub> + H<sub>2</sub>O + M → H<sub>2</sub>SO<sub>4</sub> + M:  
122 Measurement of the rate constant and product identification. *J. Chem. Phys.* **1994**, 101, 7399-7407.
- 123

124 **Table S5.** Rate ratios for SO<sub>3</sub> hydrolysis with FSA compared to H<sub>2</sub>O and *X* (*X* = HCOOH, (COOH)<sub>2</sub>, HNO<sub>3</sub> and  
125 H<sub>2</sub>SO<sub>4</sub>) within the temperature range of 280-320 K

| <i>T</i> /K                                             | [ <i>Y</i> ]     | 280                   | 290                   | 298                   | 300                   | 310                   | 320                   |
|---------------------------------------------------------|------------------|-----------------------|-----------------------|-----------------------|-----------------------|-----------------------|-----------------------|
| <i>v</i> <sub>SA_FSA</sub> / <i>v</i> <sub>SA_WM</sub>  | 20%RH            | $7.04 \times 10^{-7}$ | $3.55 \times 10^{-7}$ | $2.16 \times 10^{-7}$ | $1.87 \times 10^{-7}$ | $1.04 \times 10^{-7}$ | $6.11 \times 10^{-8}$ |
|                                                         | 40%RH            | $3.53 \times 10^{-7}$ | $1.78 \times 10^{-7}$ | $1.05 \times 10^{-7}$ | $9.36 \times 10^{-8}$ | $5.19 \times 10^{-8}$ | $3.06 \times 10^{-8}$ |
|                                                         | 60%RH            | $2.34 \times 10^{-7}$ | $1.19 \times 10^{-7}$ | $7.22 \times 10^{-8}$ | $6.23 \times 10^{-8}$ | $3.46 \times 10^{-8}$ | $2.04 \times 10^{-8}$ |
|                                                         | 80%RH            | $1.75 \times 10^{-7}$ | $8.92 \times 10^{-8}$ | $5.24 \times 10^{-8}$ | $4.68 \times 10^{-8}$ | $2.59 \times 10^{-8}$ | $1.53 \times 10^{-8}$ |
|                                                         | 100%RH           | $1.41 \times 10^{-7}$ | $7.13 \times 10^{-8}$ | $4.22 \times 10^{-8}$ | $3.74 \times 10^{-8}$ | $2.08 \times 10^{-8}$ | $1.22 \times 10^{-8}$ |
| <i>v</i> <sub>SA_FSA</sub> / <i>v</i> <sub>SA_VFA</sub> | 10 <sup>8</sup>  | $2.89 \times 10^0$    | $2.72 \times 10^0$    | $2.61 \times 10^0$    | $2.58 \times 10^0$    | $2.47 \times 10^0$    | $2.38 \times 10^0$    |
|                                                         | 10 <sup>11</sup> | $3.79 \times 10^{-2}$ | $3.62 \times 10^{-2}$ | $3.38 \times 10^{-2}$ | $3.32 \times 10^{-2}$ | $3.24 \times 10^{-2}$ | $3.02 \times 10^{-2}$ |
|                                                         | 10 <sup>11</sup> | $2.89 \times 10^{-3}$ | $2.72 \times 10^{-3}$ | $2.61 \times 10^{-3}$ | $2.58 \times 10^{-3}$ | $2.47 \times 10^{-3}$ | $2.38 \times 10^{-3}$ |
| <i>v</i> <sub>SA_OA</sub> / <i>v</i> <sub>SA_OA</sub>   | 10 <sup>7</sup>  | $1.27 \times 10^{-1}$ | $1.31 \times 10^{-1}$ | $1.34 \times 10^{-1}$ | $1.35 \times 10^{-1}$ | $1.38 \times 10^{-1}$ | $1.27 \times 10^{-1}$ |
|                                                         | 10 <sup>9</sup>  | $1.27 \times 10^{-3}$ | $1.31 \times 10^{-3}$ | $1.34 \times 10^{-3}$ | $1.35 \times 10^{-3}$ | $1.38 \times 10^{-3}$ | $1.27 \times 10^{-3}$ |
| <i>v</i> <sub>SA_FSA</sub> / <i>v</i> <sub>SA_VNA</sub> | 10 <sup>9</sup>  | $3.71 \times 10^1$    | $3.72 \times 10^1$    | $3.73 \times 10^1$    | $3.73 \times 10^1$    | $3.70 \times 10^1$    | $3.61 \times 10^1$    |
|                                                         | 10 <sup>11</sup> | $3.71 \times 10^{-1}$ | $3.72 \times 10^{-1}$ | $3.73 \times 10^{-1}$ | $3.73 \times 10^{-1}$ | $3.70 \times 10^{-1}$ | $3.61 \times 10^{-1}$ |
| <i>v</i> <sub>SA_FSA</sub> / <i>v</i> <sub>SA_SA</sub>  | 10 <sup>6</sup>  | $6.26 \times 10^0$    | $6.85 \times 10^0$    | $7.40 \times 10^0$    | $7.70 \times 10^0$    | $8.42 \times 10^0$    | $9.20 \times 10^0$    |
|                                                         | 10 <sup>7</sup>  | $4.88 \times 10^{-1}$ | $5.21 \times 10^{-1}$ | $5.48 \times 10^{-1}$ | $5.54 \times 10^{-1}$ | $5.89 \times 10^{-1}$ | $6.26 \times 10^{-1}$ |
|                                                         | 10 <sup>8</sup>  | $6.26 \times 10^{-2}$ | $6.85 \times 10^{-2}$ | $7.40 \times 10^{-2}$ | $7.70 \times 10^{-2}$ | $8.42 \times 10^{-2}$ | $9.20 \times 10^{-2}$ |

126



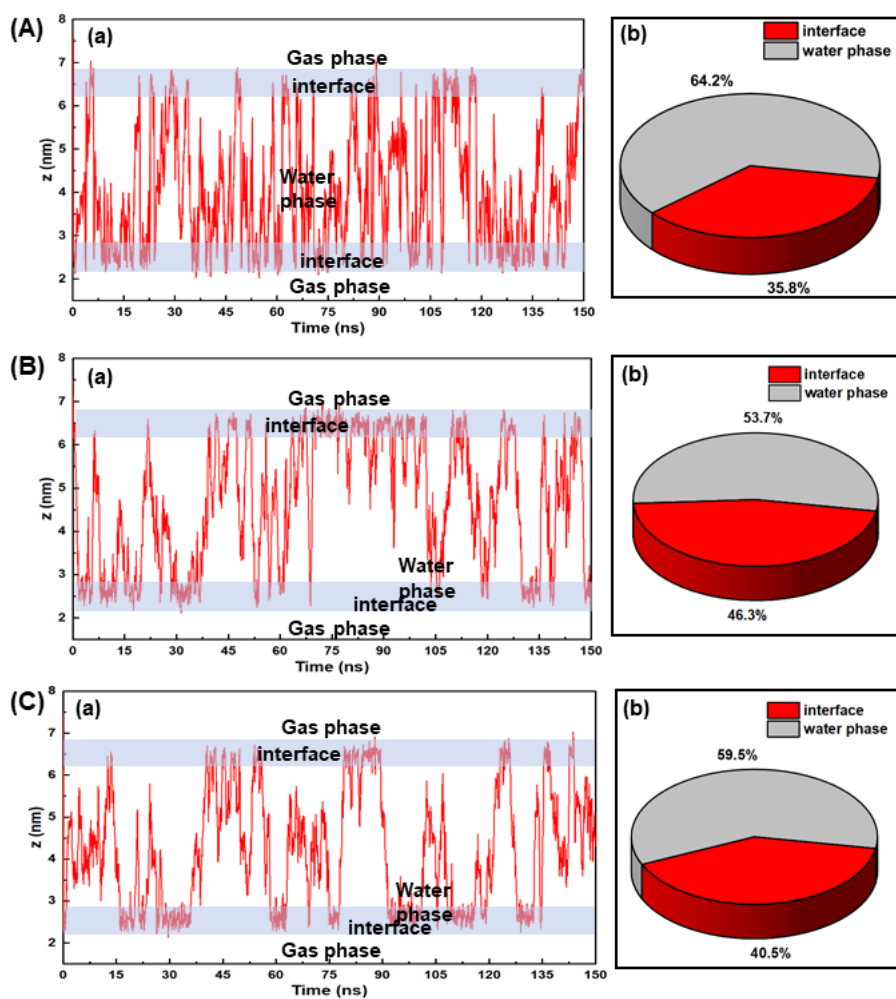

128

129

130

131

**Fig. S5.** Z coordinates of  $\text{SO}_3$  (A), FSA (B) and  $\text{SO}_3$ -FSA complex (C) as the function of simulation time, along with (a) the water density profile and (b) a pie chart showing occurrence percentages (c) at the air-water interface and in the water phase

132

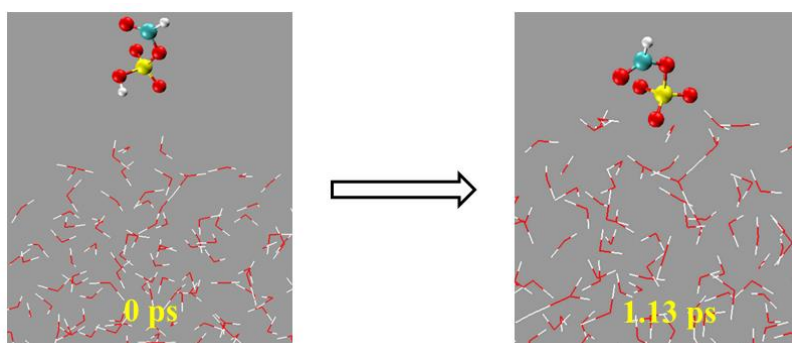

133

134 **Fig. S6.** Snapshot structures from BOMD simulations of the FSA reaction at the air-water interface. White, red,  
135 yellow and blue spheres represent H, O, S, and C atoms, respectively

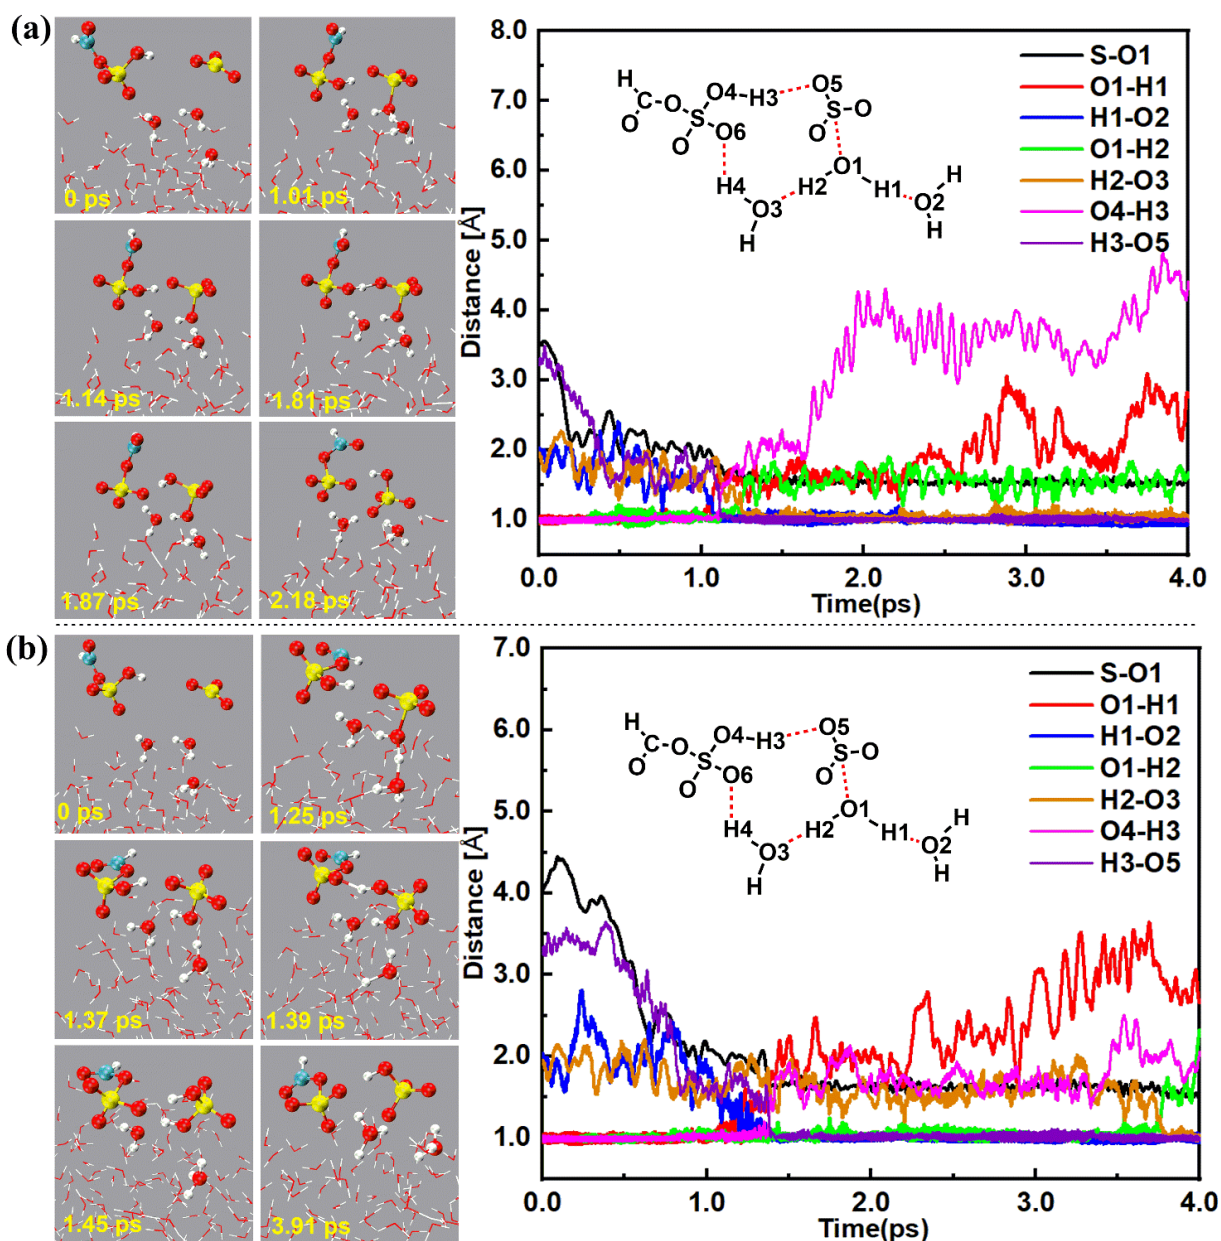

**Fig. S7.** BOMD simulations of  $\text{HSO}_4^- \cdots \text{FSA} \cdots \text{H}_3\text{O}^+$  ion pair formation from  $\text{SO}_3$  hydrolysis with FSA at the air-water interface (Top panel: Snapshot structures showing the formation of  $\text{HSO}_4^- \cdots \text{FSA} \cdots \text{H}_3\text{O}^+$  ion pair. Lower panel: Time evolution of key bond distances (S-O1, O5-H3, and O1-H2) involved in the mechanism.)

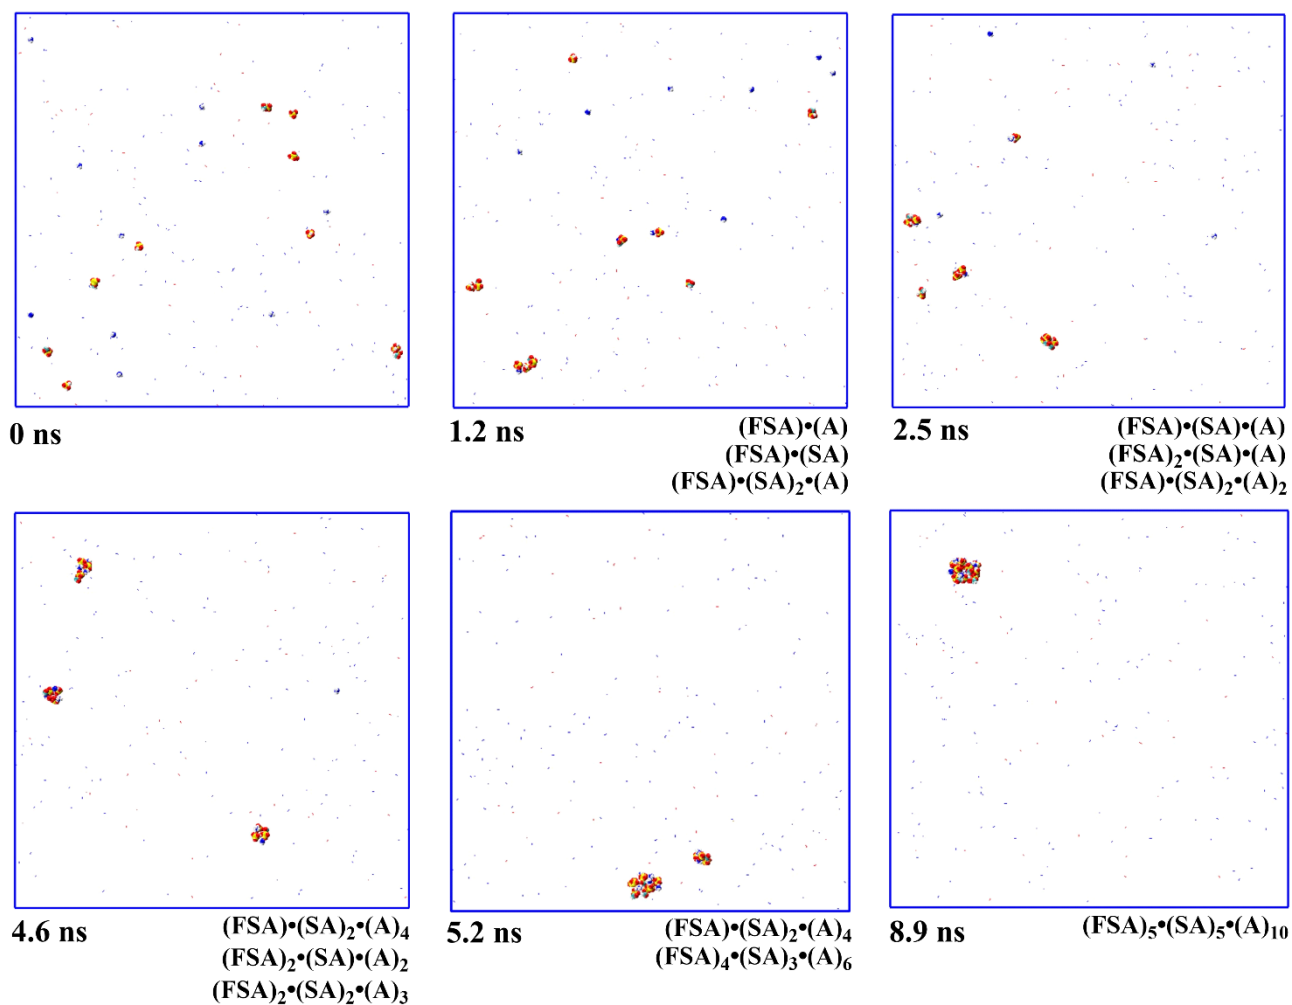

141

142

143

**Fig. S8.** Snapshots of nucleation simulation of FSA, SA and A using the VDW representation, with N<sub>2</sub> and O<sub>2</sub> shown using the line drawing method at 278.15 K

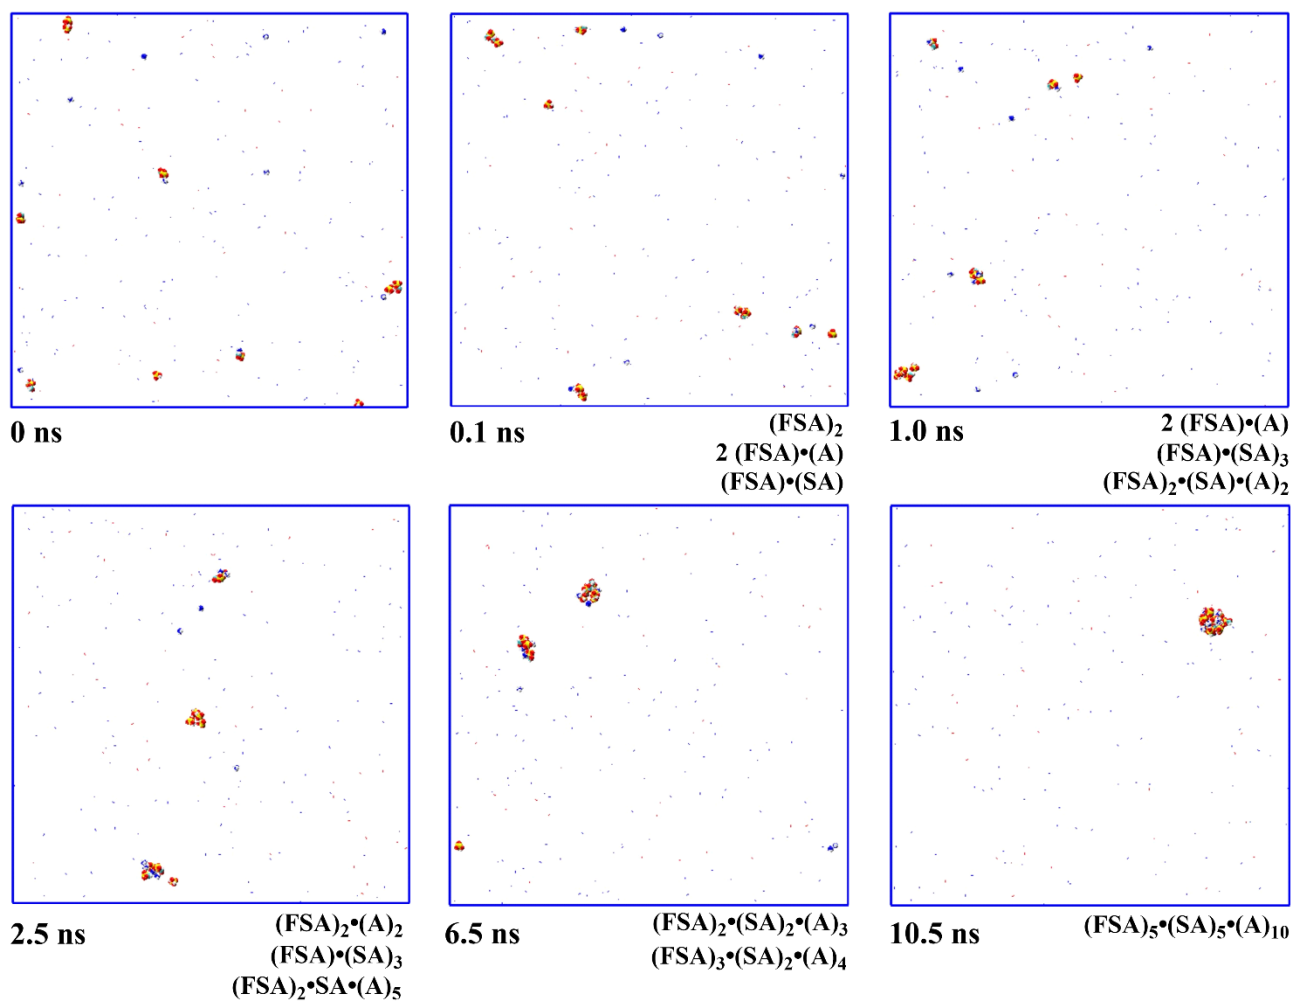

**Fig. S9.** Snapshots of nucleation simulation of FSA, SA and A using the VDW representation, with N<sub>2</sub> and O<sub>2</sub> shown using the line drawing method at 298.15 K

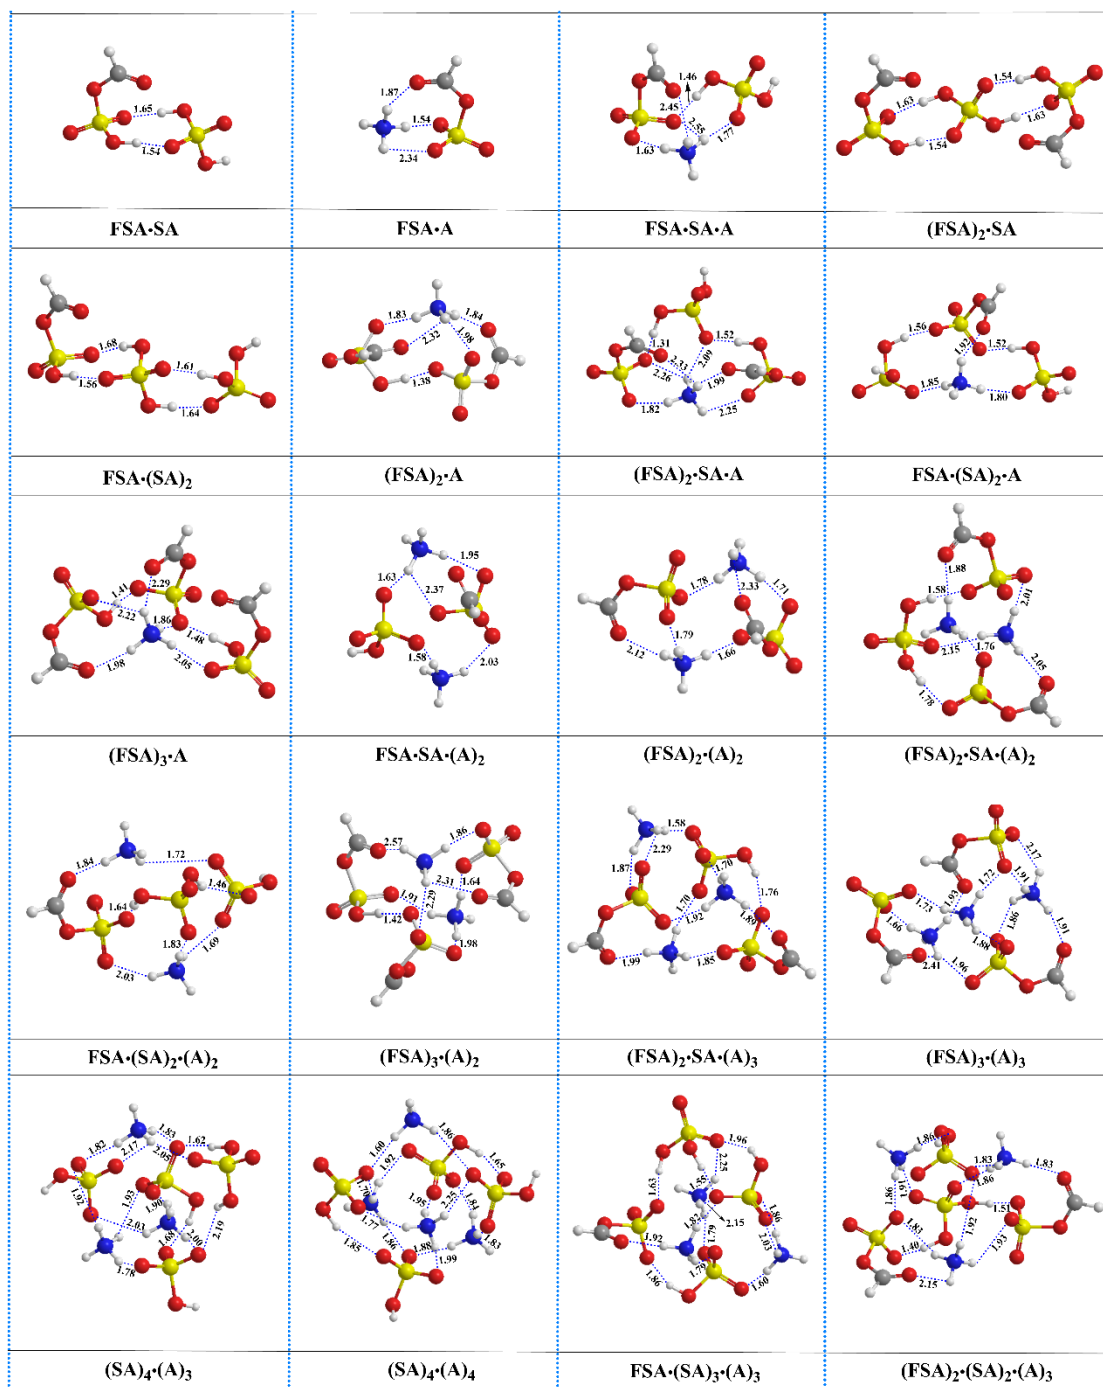

**Fig. S10.** Most stable configurations of FSA-SA-A-based clusters identified at the M06-2X/6-311++G(2df,2pd) level of theory. Hydrogen bond lengths are given in Å.

150 **Table S6.** Gibbs free energy change  $\Delta G$  (kcal·mol<sup>-1</sup>) for the formation of all clusters at 1 atm and  
151 temperatures of 298.15, 278.15, and 258.15K

| Clusters                                | $T = 298.15$ K                | $T = 278.15$ K                | $T = 258.15$ K                |
|-----------------------------------------|-------------------------------|-------------------------------|-------------------------------|
| SA·A                                    | -7.0<br>(-7.3) <sup>a</sup>   | -7.6<br>(-7.9) <sup>a</sup>   | -8.3<br>(-8.5) <sup>a</sup>   |
| (SA) <sub>2</sub>                       | -8.0<br>(-8.4) <sup>a</sup>   | -8.7<br>(-9.1) <sup>a</sup>   | -9.4<br>(-9.77) <sup>a</sup>  |
| (SA) <sub>2</sub> ·A                    | -21.0<br>(-20.8) <sup>a</sup> | -22.5<br>(-22.4) <sup>a</sup> | -24.0<br>(-24.0) <sup>a</sup> |
| (SA) <sub>2</sub> ·(A) <sub>2</sub>     | -26.5<br>(-26.5) <sup>a</sup> | -28.7<br>(-28.8) <sup>a</sup> | -30.9<br>(-31.0) <sup>a</sup> |
| (SA) <sub>3</sub>                       | -12.9<br>(-13.9) <sup>a</sup> | -14.4<br>(-15.5) <sup>a</sup> | -16.0<br>(-17.0) <sup>a</sup> |
| (SA) <sub>3</sub> ·A                    | -29.8<br>(-30.2) <sup>a</sup> | -32.1<br>(-32.5) <sup>a</sup> | -34.3<br>(-34.9) <sup>a</sup> |
| (SA) <sub>3</sub> ·(A) <sub>2</sub>     | -41.6<br>(-41.8) <sup>a</sup> | -44.6<br>(-44.9) <sup>a</sup> | -47.6<br>(-47.9) <sup>a</sup> |
| (SA) <sub>3</sub> ·(A) <sub>3</sub>     | -52.0<br>(-52.8) <sup>a</sup> | -55.8<br>(-56.6) <sup>a</sup> | -59.7<br>(-60.5) <sup>a</sup> |
| (FSA) <sub>2</sub>                      | -1.8                          | -2.5                          | -3.3                          |
| FSA·A                                   | -9.1                          | -9.8                          | -10.5                         |
| (FSA) <sub>2</sub> ·(A) <sub>2</sub>    | -31.1                         | -33.3                         | -35.5                         |
| (FSA) <sub>2</sub> ·A                   | -19.9                         | -21.5                         | -23.0                         |
| SA·FSA                                  | -5.5                          | -6.2                          | -7.0                          |
| SA·FSA·A                                | -18.4                         | -20.0                         | -21.5                         |
| SA·FSA·(A) <sub>2</sub>                 | -21.5                         | -23.8                         | -26.2                         |
| (FSA) <sub>3</sub>                      | 2.2                           | 0.6                           | -1.0                          |
| (SA) <sub>2</sub> ·FSA·A                | -19.3                         | -21.8                         | -24.3                         |
| (SA) <sub>2</sub> ·FSA·(A) <sub>2</sub> | -42.9                         | -46.0                         | -49.1                         |
| (SA) <sub>2</sub> ·FSA·(A) <sub>3</sub> | -54.1                         | -57.9                         | -61.7                         |
| SA·(FSA) <sub>2</sub>                   | -9.8                          | -11.4                         | -13.1                         |
| (FSA) <sub>3</sub> ·A                   | -27.7                         | -30.1                         | -32.4                         |
| SA·(FSA) <sub>2</sub> ·(A) <sub>2</sub> | -38.9                         | -42.1                         | -45.3                         |
| (SA) <sub>2</sub> ·FSA                  | -11.7                         | -13.2                         | -14.7                         |
| SA·(FSA) <sub>2</sub> ·A                | -24.3                         | -26.5                         | -28.8                         |
| (FSA) <sub>3</sub> ·(A) <sub>2</sub>    | -37.4                         | -40.4                         | -43.5                         |

|     |                                                                                                              |       |       |       |
|-----|--------------------------------------------------------------------------------------------------------------|-------|-------|-------|
| 152 | Continued table                                                                                              |       |       |       |
|     | SA·(FSA) <sub>2</sub> ·(A) <sub>3</sub>                                                                      | -56.7 | -60.6 | -64.4 |
|     | (FSA) <sub>3</sub> ·(A) <sub>3</sub>                                                                         | -51.6 | -55.4 | -59.2 |
| 153 | *Calculated at M06-2X/6-311++G(2df,2pd) level of theory.                                                     |       |       |       |
| 154 | <sup>a</sup> The values in parentheses taken from reference ( <i>J. Phys. Chem. A</i> 2020, 124, 3261-3268.) |       |       |       |



**Table S7.** Evaporation rates ( $\gamma$ ,  $\text{s}^{-1}$ ) of the studied clusters at 298.15, 278.15, and 258.15K

| Evaporation pathways                                                                                                                  | 298.15 K              | 278.15 K              | 258.15 K               |
|---------------------------------------------------------------------------------------------------------------------------------------|-----------------------|-----------------------|------------------------|
| $(\text{SA})_2 \rightarrow \text{SA} + \text{SA}$                                                                                     | $4.11 \times 10^4$    | $4.33 \times 10^3$    | $3.23 \times 10^2$     |
| $(\text{SA})_3 \rightarrow (\text{SA})_2 + \text{SA}$                                                                                 | $1.18 \times 10^5$    | $1.37 \times 10^4$    | $1.13 \times 10^3$     |
| $(\text{SA})_1 \cdot (\text{A})_1 \rightarrow \text{SA} + \text{A}$                                                                   | $2.96 \times 10^4$    | $4.01 \times 10^3$    | $3.98 \times 10^2$     |
| $(\text{SA})_2 \cdot (\text{A})_1 \rightarrow (\text{SA})_1 \cdot (\text{A})_1 + \text{SA}$                                           | $1.29 \times 10^{-1}$ | $4.80 \times 10^{-3}$ | $1.07 \times 10^{-4}$  |
| $(\text{SA})_2 \cdot (\text{A})_1 \rightarrow \text{A} + (\text{SA})_2$                                                               | $1.21 \times 10^{-1}$ | $5.76 \times 10^{-3}$ | $1.71 \times 10^{-4}$  |
| $(\text{SA})_3 \cdot (\text{A})_1 \rightarrow (\text{SA})_2 \cdot (\text{A})_1 + \text{SA}$                                           | $7.65 \times 10^2$    | $6.47 \times 10^1$    | $3.70 \times 10^0$     |
| $(\text{SA})_3 \cdot (\text{A})_1 \rightarrow \text{A} + (\text{SA})_3$                                                               | $1.09 \times 10^{-3}$ | $3.80 \times 10^{-5}$ | $7.83 \times 10^{-7}$  |
| $(\text{SA})_2 \cdot (\text{A})_2 \rightarrow (\text{SA})_2 \cdot (\text{A})_1 + \text{A}$                                            | $6.13 \times 10^5$    | $8.86 \times 10^4$    | $9.51 \times 10^3$     |
| $(\text{SA})_3 \cdot (\text{A})_2 \rightarrow (\text{SA})_2 \cdot (\text{A})_2 + \text{SA}$                                           | $2.06 \times 10^{-2}$ | $7.91 \times 10^{-4}$ | $1.82 \times 10^{-5}$  |
| $(\text{SA})_3 \cdot (\text{A})_2 \rightarrow (\text{SA})_3 \cdot (\text{A})_1 + \text{A}$                                            | $1.66 \times 10^1$    | $1.09 \times 10^0$    | $4.70 \times 10^{-2}$  |
| $(\text{SA})_3 \cdot (\text{A})_3 \rightarrow (\text{SA})_3 \cdot (\text{A})_2 + \text{A}$                                            | $2.25 \times 10^2$    | $1.48 \times 10^1$    | $6.32 \times 10^{-1}$  |
| $(\text{SA})_1 \cdot (\text{FSA})_1 \rightarrow \text{SA} + \text{FSA}$                                                               | $1.82 \times 10^5$    | $2.38 \times 10^4$    | $2.26 \times 10^3$     |
| $(\text{SA})_2 \cdot (\text{FSA})_1 \rightarrow (\text{SA})_1 \cdot (\text{FSA})_1 + \text{SA}$                                       | $5.78 \times 10^4$    | $7.03 \times 10^3$    | $6.15 \times 10^2$     |
| $(\text{SA})_2 \cdot (\text{FSA})_1 \rightarrow \text{FSA} + (\text{SA})_2$                                                           | $2.29 \times 10^5$    | $3.46 \times 10^4$    | $3.86 \times 10^3$     |
| $(\text{FSA})_1 \cdot (\text{A})_1 \rightarrow \text{FSA} + \text{A}$                                                                 | $1.16 \times 10^3$    | $1.01 \times 10^2$    | $6.00 \times 10^0$     |
| $(\text{SA})_1 \cdot (\text{FSA})_1 \cdot (\text{A})_1 \rightarrow \text{SA} + (\text{FSA})_1 \cdot (\text{A})_1$                     | $2.59 \times 10^2$    | $2.04 \times 10^1$    | $1.07 \times 10^0$     |
| $(\text{SA})_1 \cdot (\text{FSA})_1 \cdot (\text{A})_1 \rightarrow \text{A} + (\text{SA})_1 \cdot (\text{FSA})_1$                     | $2.27 \times 10^0$    | $1.19 \times 10^{-1}$ | $1.56 \times 10^{-2}$  |
| $(\text{SA})_1 \cdot (\text{FSA})_1 \cdot (\text{A})_1 \rightarrow \text{FSA} + (\text{SA})_1 \cdot (\text{A})_1$                     | $9.73 \times 10^0$    | $4.92 \times 10^{-1}$ | $1.45 \times 10^{-5}$  |
| $(\text{SA})_2 \cdot (\text{FSA})_1 \cdot (\text{A})_1 \rightarrow \text{SA} + (\text{SA})_1 \cdot (\text{A})_1 \cdot (\text{FSA})_1$ | $4.93 \times 10^8$    | $7.62 \times 10^7$    | $8.78 \times 10^6$     |
| $(\text{SA})_2 \cdot (\text{FSA})_1 \cdot (\text{A})_1 \rightarrow \text{A} + (\text{SA})_2 \cdot (\text{FSA})_1$                     | $3.08 \times 10^4$    | $2.05 \times 10^3$    | $8.94 \times 10^1$     |
| $(\text{SA})_2 \cdot (\text{FSA})_1 \cdot (\text{A})_1 \rightarrow \text{FSA} + (\text{SA})_2 \cdot (\text{A})_1$                     | $3.67 \times 10^{10}$ | $7.73 \times 10^9$    | $1.26 \times 10^9$     |
| $(\text{SA})_1 \cdot (\text{FSA})_1 \cdot (\text{A})_2 \rightarrow \text{A} + (\text{SA})_1 \cdot (\text{FSA})_1 \cdot (\text{A})_1$  | $3.83 \times 10^7$    | $6.25 \times 10^6$    | $7.69 \times 10^5$     |
| $(\text{SA})_2 \cdot (\text{FSA})_1 \cdot (\text{A})_2 \rightarrow \text{SA} + (\text{SA})_1 \cdot (\text{FSA})_1 \cdot (\text{A})_2$ | $4.31 \times 10^{-7}$ | $7.70 \times 10^{-9}$ | $7.33 \times 10^{-11}$ |
| $(\text{SA})_2 \cdot (\text{FSA})_1 \cdot (\text{A})_2 \rightarrow \text{A} + (\text{SA})_2 \cdot (\text{FSA})_1 \cdot (\text{A})_1$  | $5.33 \times 10^{-8}$ | $1.00 \times 10^{-9}$ | $1.02 \times 10^{-11}$ |
| $(\text{SA})_2 \cdot (\text{FSA})_1 \cdot (\text{A})_2 \rightarrow \text{FSA} + (\text{SA})_2 \cdot (\text{A})_2$                     | $2.28 \times 10^{-3}$ | $6.23 \times 10^{-5}$ | $9.64 \times 10^{-7}$  |
| $(\text{SA})_2 \cdot (\text{FSA})_1 \cdot (\text{A})_3 \rightarrow \text{A} + (\text{SA})_2 \cdot (\text{FSA})_1 \cdot (\text{A})_2$  | $5.75 \times 10^1$    | $4.01 \times 10^0$    | $1.85 \times 10^{-1}$  |
| $(\text{FSA})_2 \rightarrow \text{FSA} + \text{FSA}$                                                                                  | $9.93 \times 10^7$    | $2.01 \times 10^7$    | $3.15 \times 10^6$     |
| $(\text{SA})_1 \cdot (\text{FSA})_2 \rightarrow \text{SA} + (\text{FSA})_2$                                                           | $2.64 \times 10^3$    | $2.13 \times 10^2$    | $1.16 \times 10^1$     |

|                                                                                       |                        |                        |                        |
|---------------------------------------------------------------------------------------|------------------------|------------------------|------------------------|
| $(SA)_1 \cdot (FSA)_2 \rightarrow FSA + (SA)_1 \cdot (FSA)_1$                         | $1.35 \times 10^6$     | $1.69 \times 10^5$     | $1.52 \times 10^4$     |
| $(FSA)_2 \cdot (A)_1 \rightarrow A + (FSA)_2$                                         | $3.88 \times 10^{-4}$  | $1.01 \times 10^{-5}$  | $1.50 \times 10^{-7}$  |
| $(FSA)_2 \cdot (A)_1 \rightarrow FSA + (FSA)_1 \cdot (A)_1$                           | $2.31 \times 10^1$     | $1.40 \times 10^0$     | $5.47 \times 10^{-2}$  |
| $(SA)_1 \cdot (FSA)_2 \cdot (A)_1 \rightarrow SA + (FSA)_2 \cdot (A)_1$               | $1.40 \times 10^6$     | $2.47 \times 10^5$     | $3.30 \times 10^4$     |
| $(SA)_1 \cdot (FSA)_2 \cdot (A)_1 \rightarrow A + (SA)_1 \cdot (FSA)_2$               | $3.03 \times 10^{-1}$  | $1.73 \times 10^{-2}$  | $6.28 \times 10^{-4}$  |
| $(SA)_1 \cdot (FSA)_2 \cdot (A)_1 \rightarrow FSA + (SA)_1 \cdot (FSA)_1 \cdot (A)_1$ | $1.03 \times 10^5$     | $1.41 \times 10^4$     | $1.39 \times 10^3$     |
| $(FSA)_2 \cdot (A)_2 \rightarrow A + (FSA)_2 \cdot (A)_1$                             | $5.34 \times 10^1$     | $4.34 \times 10^0$     | $2.37 \times 10^{-1}$  |
| $(SA)_1 \cdot (FSA)_2 \cdot (A)_2 \rightarrow SA + (FSA)_2 \cdot (A)_2$               | $4.47 \times 10^3$     | $3.05 \times 10^2$     | $1.37 \times 10^1$     |
| $(SA)_1 \cdot (FSA)_2 \cdot (A)_2 \rightarrow A + (SA)_1 \cdot (FSA)_2 \cdot (A)_1$   | $1.91 \times 10^{-1}$  | $6.00 \times 10^{-3}$  | $1.11 \times 10^{-4}$  |
| $(SA)_1 \cdot (FSA)_2 \cdot (A)_2 \rightarrow FSA + (SA)_1 \cdot (FSA)_1 \cdot (A)_2$ | $3.36 \times 10^{-4}$  | $8.82 \times 10^{-6}$  | $1.31 \times 10^{-7}$  |
| $(SA)_1 \cdot (FSA)_2 \cdot (A)_3 \rightarrow A + (SA)_1 \cdot (FSA)_2 \cdot (A)_2$   | $8.49 \times 10^{-4}$  | $2.90 \times 10^{-5}$  | $5.89 \times 10^{-7}$  |
| $(FSA)_3 \rightarrow (FSA)_2 + FSA$                                                   | $1.62 \times 10^{12}$  | $5.98 \times 10^{11}$  | $1.87 \times 10^{11}$  |
| $(FSA)_3 \cdot (A)_1 \rightarrow A + (FSA)_3$                                         | $1.19 \times 10^{-12}$ | $8.05 \times 10^{-15}$ | $2.52 \times 10^{-17}$ |
| $(FSA)_3 \cdot (A)_1 \rightarrow FSA + (FSA)_2 \cdot (A)_1$                           | $4.26 \times 10^3$     | $4.08 \times 10^2$     | $2.69 \times 10^1$     |
| $(FSA)_3 \cdot (A)_2 \rightarrow A + (FSA)_3 \cdot (A)_1$                             | $8.51 \times 10^2$     | $7.09 \times 10^1$     | $4.01 \times 10^0$     |
| $(FSA)_3 \cdot (A)_2 \rightarrow FSA + (FSA)_2 \cdot (A)_2$                           | $6.26 \times 10^4$     | $6.16 \times 10^3$     | $4.19 \times 10^2$     |
| $(FSA)_3 \cdot (A)_3 \rightarrow A + (FSA)_3 \cdot (A)_2$                             | $3.30 \times 10^{-1}$  | $1.60 \times 10^{-2}$  | $4.82 \times 10^{-4}$  |

**Table S8.** Collision coefficients ( $\beta$ ,  $\text{cm}^3 \text{s}^{-1}$ ) for each cluster

| Collisions                                 | $\beta \text{ (cm}^3\text{s}^{-1}\text{)}$ |                        |                        |
|--------------------------------------------|--------------------------------------------|------------------------|------------------------|
|                                            | 298.15 K                                   | 278.15 K               | 258.15 K               |
| SA + A                                     | $1.65 \times 10^{-10}$                     | $1.54 \times 10^{-10}$ | $1.42 \times 10^{-10}$ |
| SA + FSA                                   | $7.51 \times 10^{-11}$                     | $7.00 \times 10^{-11}$ | $6.50 \times 10^{-11}$ |
| FSA + A                                    | $2.06 \times 10^{-10}$                     | $1.92 \times 10^{-10}$ | $1.78 \times 10^{-10}$ |
| SA + SA                                    | $6.77 \times 10^{-11}$                     | $6.32 \times 10^{-11}$ | $5.87 \times 10^{-11}$ |
| FSA + FSA                                  | $8.01 \times 10^{-11}$                     | $7.47 \times 10^{-11}$ | $6.94 \times 10^{-11}$ |
| (SA) <sub>2</sub> + A                      | $2.82 \times 10^{-10}$                     | $2.63 \times 10^{-10}$ | $2.45 \times 10^{-10}$ |
| SA·A + SA                                  | $8.95 \times 10^{-11}$                     | $8.35 \times 10^{-11}$ | $7.75 \times 10^{-11}$ |
| (SA) <sub>2</sub> ·A + A                   | $2.95 \times 10^{-10}$                     | $2.75 \times 10^{-10}$ | $2.55 \times 10^{-10}$ |
| (FSA) <sub>2</sub> + A                     | $3.07 \times 10^{-10}$                     | $2.86 \times 10^{-10}$ | $2.65 \times 10^{-10}$ |
| FSA·A + FSA                                | $8.28 \times 10^{-11}$                     | $7.72 \times 10^{-11}$ | $7.17 \times 10^{-11}$ |
| (FSA) <sub>2</sub> ·A + A                  | $3.47 \times 10^{-10}$                     | $3.24 \times 10^{-10}$ | $3.00 \times 10^{-10}$ |
| (SA) <sub>2</sub> + FSA                    | $8.77 \times 10^{-11}$                     | $8.18 \times 10^{-11}$ | $7.59 \times 10^{-11}$ |
| SA·FSA + SA                                | $8.83 \times 10^{-11}$                     | $8.24 \times 10^{-11}$ | $7.65 \times 10^{-11}$ |
| (FSA) <sub>2</sub> + SA                    | $8.77 \times 10^{-11}$                     | $8.19 \times 10^{-11}$ | $7.60 \times 10^{-11}$ |
| SA·FSA + FSA                               | $8.81 \times 10^{-11}$                     | $8.22 \times 10^{-11}$ | $7.63 \times 10^{-11}$ |
| (SA) <sub>2</sub> + SA                     | $8.67 \times 10^{-11}$                     | $8.09 \times 10^{-11}$ | $7.51 \times 10^{-11}$ |
| (FSA) <sub>2</sub> + FSA                   | $8.68 \times 10^{-11}$                     | $8.10 \times 10^{-11}$ | $7.52 \times 10^{-11}$ |
| SA + (SA) <sub>2</sub> ·A                  | $8.82 \times 10^{-11}$                     | $8.23 \times 10^{-11}$ | $7.63 \times 10^{-11}$ |
| (SA) <sub>3</sub> + A                      | $4.00 \times 10^{-10}$                     | $3.73 \times 10^{-10}$ | $3.46 \times 10^{-10}$ |
| (SA) <sub>2</sub> ·(A) <sub>2</sub> + SA   | $9.40 \times 10^{-11}$                     | $8.77 \times 10^{-11}$ | $8.14 \times 10^{-11}$ |
| (SA) <sub>3</sub> ·A + A                   | $3.16 \times 10^{-10}$                     | $2.95 \times 10^{-10}$ | $2.73 \times 10^{-10}$ |
| (SA) <sub>3</sub> ·(A) <sub>2</sub> + A    | $4.15 \times 10^{-10}$                     | $3.87 \times 10^{-10}$ | $3.59 \times 10^{-10}$ |
| (FSA) <sub>2</sub> ·A + FSA                | $9.44 \times 10^{-11}$                     | $8.81 \times 10^{-11}$ | $8.17 \times 10^{-11}$ |
| (FSA) <sub>3</sub> + A                     | $3.88 \times 10^{-10}$                     | $3.62 \times 10^{-10}$ | $3.36 \times 10^{-10}$ |
| (FSA) <sub>2</sub> ·(A) <sub>2</sub> + FSA | $1.01 \times 10^{-10}$                     | $9.44 \times 10^{-11}$ | $8.76 \times 10^{-11}$ |
| (FSA) <sub>3</sub> ·A + A                  | $4.03 \times 10^{-10}$                     | $3.76 \times 10^{-10}$ | $3.49 \times 10^{-10}$ |
| (FSA) <sub>3</sub> ·(A) <sub>2</sub> + A   | $3.92 \times 10^{-10}$                     | $3.65 \times 10^{-10}$ | $3.39 \times 10^{-10}$ |
| FSA·A + SA                                 | $7.89 \times 10^{-11}$                     | $7.36 \times 10^{-11}$ | $6.83 \times 10^{-11}$ |
| SA·A + FSA                                 | $9.49 \times 10^{-11}$                     | $8.85 \times 10^{-11}$ | $8.22 \times 10^{-11}$ |
| SA·FSA + A                                 | $2.99 \times 10^{-10}$                     | $2.79 \times 10^{-10}$ | $2.59 \times 10^{-10}$ |
| SA·FSA·A + A                               | $2.90 \times 10^{-10}$                     | $2.70 \times 10^{-10}$ | $2.51 \times 10^{-10}$ |
| SA·FSA·A + SA                              | $8.43 \times 10^{-11}$                     | $7.86 \times 10^{-11}$ | $7.30 \times 10^{-11}$ |

|                                    |                        |                        |                        |
|------------------------------------|------------------------|------------------------|------------------------|
| $(SA)_2 \cdot A + FSA$             | $8.84 \times 10^{-11}$ | $8.24 \times 10^{-11}$ | $7.65 \times 10^{-11}$ |
| $(SA)_2 \cdot FSA + A$             | $4.54 \times 10^{-10}$ | $4.24 \times 10^{-10}$ | $3.93 \times 10^{-10}$ |
| $SA \cdot FSA \cdot (A)_2 + SA$    | $8.00 \times 10^{-11}$ | $7.46 \times 10^{-11}$ | $6.92 \times 10^{-11}$ |
| $(SA)_2 \cdot (A)_2 + FSA$         | $9.32 \times 10^{-11}$ | $8.69 \times 10^{-11}$ | $8.07 \times 10^{-11}$ |
| $(SA)_2 \cdot FSA \cdot A + A$     | $4.37 \times 10^{-10}$ | $4.07 \times 10^{-10}$ | $3.78 \times 10^{-10}$ |
| $(SA)_2 \cdot FSA \cdot (A)_2 + A$ | $3.66 \times 10^{-10}$ | $3.42 \times 10^{-10}$ | $3.17 \times 10^{-10}$ |
| $(FSA)_2 \cdot A + SA$             | $9.66 \times 10^{-11}$ | $9.01 \times 10^{-11}$ | $8.36 \times 10^{-11}$ |
| $SA \cdot FSA \cdot A + FSA$       | $8.39 \times 10^{-11}$ | $7.83 \times 10^{-11}$ | $7.27 \times 10^{-11}$ |
| $SA \cdot (FSA)_2 + A$             | $4.96 \times 10^{-10}$ | $4.63 \times 10^{-10}$ | $4.30 \times 10^{-10}$ |
| $(FSA)_2 \cdot (A)_2 + SA$         | $1.05 \times 10^{-10}$ | $9.75 \times 10^{-11}$ | $9.05 \times 10^{-11}$ |
| $SA \cdot FSA \cdot (A)_2 + FSA$   | $7.96 \times 10^{-11}$ | $7.42 \times 10^{-11}$ | $6.89 \times 10^{-11}$ |
| $SA \cdot (FSA)_2 \cdot A + A$     | $4.20 \times 10^{-10}$ | $3.92 \times 10^{-10}$ | $3.64 \times 10^{-10}$ |
| $SA \cdot (FSA)_2 \cdot (A)_2 + A$ | $3.95 \times 10^{-10}$ | $3.68 \times 10^{-10}$ | $3.42 \times 10^{-10}$ |

161 **Table S9.** Total evaporation coefficients ( $\sum\gamma$ , s-1) for each cluster

| Clusters                                 | $\sum\gamma$ , (s <sup>-1</sup> ) |                       |                       |
|------------------------------------------|-----------------------------------|-----------------------|-----------------------|
|                                          | 298.15 K                          | 278.15 K              | 258.15 K              |
| SA·A                                     | $2.96 \times 10^4$                | $4.01 \times 10^3$    | $3.98 \times 10^2$    |
| SA·FSA                                   | $1.82 \times 10^5$                | $2.38 \times 10^4$    | $2.26 \times 10^3$    |
| A·FSA                                    | $1.16 \times 10^3$                | $1.01 \times 10^2$    | $6.00 \times 10^0$    |
| (SA) <sub>2</sub>                        | $4.11 \times 10^4$                | $4.33 \times 10^3$    | $3.23 \times 10^2$    |
| (FSA) <sub>2</sub>                       | $9.93 \times 10^7$                | $2.01 \times 10^7$    | $3.15 \times 10^6$    |
| (SA) <sub>2</sub> ·A                     | $2.50 \times 10^{-1}$             | $1.06 \times 10^{-2}$ | $2.78 \times 10^{-4}$ |
| (SA) <sub>2</sub> ·(A) <sub>2</sub>      | $6.13 \times 10^5$                | $8.86 \times 10^4$    | $9.51 \times 10^3$    |
| A·(FSA) <sub>2</sub>                     | $2.31 \times 10^1$                | $1.40 \times 10^0$    | $5.47 \times 10^{-2}$ |
| (A) <sub>2</sub> ·(FSA) <sub>2</sub>     | $5.34 \times 10^1$                | $4.34 \times 10^0$    | $2.37 \times 10^{-1}$ |
| (SA) <sub>2</sub> ·FSA                   | $2.87 \times 10^5$                | $4.17 \times 10^4$    | $4.47 \times 10^3$    |
| SA·(FSA) <sub>2</sub>                    | $1.35 \times 10^6$                | $1.69 \times 10^5$    | $1.52 \times 10^4$    |
| (SA) <sub>3</sub>                        | $1.18 \times 10^5$                | $1.37 \times 10^4$    | $1.13 \times 10^3$    |
| (FSA) <sub>3</sub>                       | $1.62 \times 10^{12}$             | $5.98 \times 10^{11}$ | $1.87 \times 10^{11}$ |
| (SA) <sub>3</sub> ·A                     | $7.65 \times 10^2$                | $6.47 \times 10^1$    | $3.70 \times 10^0$    |
| (SA) <sub>3</sub> ·(A) <sub>2</sub>      | $1.66 \times 10^1$                | $1.09 \times 10^0$    | $4.70 \times 10^{-2}$ |
| (SA) <sub>3</sub> ·(A) <sub>3</sub>      | $2.25 \times 10^2$                | $1.48 \times 10^1$    | $6.32 \times 10^{-1}$ |
| A·(FSA) <sub>3</sub>                     | $4.26 \times 10^3$                | $4.08 \times 10^2$    | $2.69 \times 10^1$    |
| (A) <sub>2</sub> ·(FSA) <sub>3</sub>     | $6.35 \times 10^4$                | $6.23 \times 10^3$    | $4.23 \times 10^2$    |
| (A) <sub>3</sub> ·(FSA) <sub>3</sub>     | $3.30 \times 10^{-1}$             | $1.60 \times 10^{-2}$ | $4.82 \times 10^{-4}$ |
| SA·A·FSA                                 | $2.71 \times 10^2$                | $2.10 \times 10^1$    | $1.09 \times 10^0$    |
| SA·(A) <sub>2</sub> ·FSA                 | $3.83 \times 10^7$                | $6.25 \times 10^6$    | $7.69 \times 10^5$    |
| SA <sub>2</sub> ·A·FSA                   | $3.72 \times 10^{10}$             | $7.80 \times 10^9$    | $1.27 \times 10^9$    |
| (SA) <sub>2</sub> ·(A) <sub>2</sub> ·FSA | $2.28 \times 10^{-3}$             | $6.23 \times 10^{-5}$ | $9.64 \times 10^{-7}$ |
| (SA) <sub>2</sub> ·(A) <sub>3</sub> ·FSA | $5.75 \times 10^1$                | $4.01 \times 10^0$    | $1.85 \times 10^{-1}$ |
| SA·A·(FSA) <sub>2</sub>                  | $1.50 \times 10^6$                | $2.61 \times 10^5$    | $3.44 \times 10^4$    |
| SA·(A) <sub>2</sub> ·(FSA) <sub>2</sub>  | $4.47 \times 10^3$                | $3.05 \times 10^2$    | $1.37 \times 10^1$    |
| SA·(A) <sub>3</sub> ·(FSA) <sub>2</sub>  | $8.49 \times 10^{-4}$             | $2.90 \times 10^{-5}$ | $5.89 \times 10^{-7}$ |

162

**Table S10.** Ratios ( $\beta C/\Sigma\gamma$ ) of monomer collisions to evaporation coefficients for each FSA-involved cluster in this study.  $[SA] = 1.0 \times 10^7$  molecules $\cdot$ cm $^{-3}$ ,  $[A] = 1.0 \times 10^{10}$  molecules $\cdot$ cm $^{-3}$ ,  $[FSA] = 1.0 \times 10^6$  molecules $\cdot$ cm $^{-3}$

| Clusters                              | $\beta C/\Sigma\gamma$ |                        |                        |
|---------------------------------------|------------------------|------------------------|------------------------|
|                                       | 298.15 K               | 278.15 K               | 258.15 K               |
| Collision with SA monomer: $C = [SA]$ |                        |                        |                        |
| SA $\cdot$ A                          | $3.02 \times 10^{-14}$ | $2.08 \times 10^{-13}$ | $1.95 \times 10^{-12}$ |
| SA $\cdot$ FSA                        | $1.15 \times 10^{-18}$ | $4.32 \times 10^{-18}$ | $2.01 \times 10^{-17}$ |
| A $\cdot$ FSA                         | $1.03 \times 10^{-21}$ | $1.72 \times 10^{-21}$ | $3.11 \times 10^{-21}$ |
| (SA) $_2$                             | $2.11 \times 10^{-14}$ | $1.87 \times 10^{-13}$ | $2.33 \times 10^{-12}$ |
| (FSA) $_2$                            | $2.65 \times 10^{-19}$ | $1.00 \times 10^{-18}$ | $4.72 \times 10^{-18}$ |
| (SA) $_2\cdot$ A                      | $3.53 \times 10^{-9}$  | $7.79 \times 10^{-8}$  | $2.74 \times 10^{-6}$  |
| (SA) $_2\cdot$ (A) $_2$               | $1.54 \times 10^{-15}$ | $9.91 \times 10^{-15}$ | $8.56 \times 10^{-14}$ |
| A $\cdot$ (FSA) $_2$                  | $1.30 \times 10^{-18}$ | $4.89 \times 10^{-18}$ | $2.26 \times 10^{-17}$ |
| (A) $_2\cdot$ (FSA) $_2$              | $1.27 \times 10^{-19}$ | $3.81 \times 10^{-19}$ | $1.36 \times 10^{-18}$ |
| SA $\cdot$ A $\cdot$ FSA              | $1.30 \times 10^{-15}$ | $1.04 \times 10^{-14}$ | $1.16 \times 10^{-13}$ |
| SA $\cdot$ (A) $_2\cdot$ FSA          | $2.61 \times 10^{-22}$ | $5.24 \times 10^{-22}$ | $1.18 \times 10^{-21}$ |
| Collision with A monomer: $C = [A]$   |                        |                        |                        |
| SA $\cdot$ FSA                        | $3.53 \times 10^{-17}$ | $1.33 \times 10^{-16}$ | $6.18 \times 10^{-16}$ |
| (SA) $_2$                             | $6.86 \times 10^{-13}$ | $6.08 \times 10^{-12}$ | $7.57 \times 10^{-11}$ |
| (FSA) $_2$                            | $7.49 \times 10^{-18}$ | $2.84 \times 10^{-17}$ | $1.33 \times 10^{-16}$ |
| (SA) $_2\cdot$ A                      | $1.18 \times 10^{-7}$  | $2.60 \times 10^{-6}$  | $9.17 \times 10^{-5}$  |
| A $\cdot$ (FSA) $_2$                  | $3.85 \times 10^{-17}$ | $1.45 \times 10^{-16}$ | $6.69 \times 10^{-16}$ |
| (SA) $_2\cdot$ FSA                    | $5.81 \times 10^{-14}$ | $3.92 \times 10^{-13}$ | $3.60 \times 10^{-12}$ |
| SA $\cdot$ (FSA) $_2$                 | $2.02 \times 10^{-16}$ | $1.34 \times 10^{-15}$ | $1.20 \times 10^{-14}$ |
| (SA) $_3$                             | $3.38 \times 10^{-13}$ | $2.73 \times 10^{-12}$ | $3.07 \times 10^{-11}$ |
| (FSA) $_3$                            | $2.28 \times 10^{-14}$ | $1.75 \times 10^{-13}$ | $1.86 \times 10^{-12}$ |
| (SA) $_3\cdot$ A                      | $4.13 \times 10^{-11}$ | $4.56 \times 10^{-10}$ | $7.39 \times 10^{-9}$  |
| (SA) $_3\cdot$ (A) $_2$               | $2.50 \times 10^{-9}$  | $3.55 \times 10^{-8}$  | $7.65 \times 10^{-7}$  |
| A $\cdot$ (FSA) $_3$                  | $5.89 \times 10^{-19}$ | $1.73 \times 10^{-18}$ | $5.97 \times 10^{-18}$ |
| (A) $_2\cdot$ (FSA) $_3$              | $2.51 \times 10^{-17}$ | $8.68 \times 10^{-17}$ | $3.67 \times 10^{-16}$ |
| SA $\cdot$ A $\cdot$ FSA              | $4.10 \times 10^{-14}$ | $3.28 \times 10^{-13}$ | $3.67 \times 10^{-12}$ |
| (SA) $_2\cdot$ A $\cdot$ FSA          | $3.11 \times 10^{-15}$ | $2.03 \times 10^{-14}$ | $1.79 \times 10^{-13}$ |

|                                       |                        |                        |                        |
|---------------------------------------|------------------------|------------------------|------------------------|
| $(SA)_2 \cdot (A)_2 \cdot FSA$        | $2.45 \times 10^{-12}$ | $2.82 \times 10^{-11}$ | $4.82 \times 10^{-10}$ |
| $SA \cdot A \cdot (FSA)_2$            | $4.52 \times 10^{-14}$ | $3.88 \times 10^{-13}$ | $4.70 \times 10^{-12}$ |
| $SA \cdot (A)_2 \cdot (FSA)_2$        | $3.12 \times 10^{-21}$ | $5.14 \times 10^{-21}$ | $9.27 \times 10^{-21}$ |
| Collision with FSA monomer: $C=[FSA]$ |                        |                        |                        |
| $SA \cdot A$                          | $3.94 \times 10^{-15}$ | $2.71 \times 10^{-14}$ | $2.54 \times 10^{-13}$ |
| $SA \cdot FSA$                        | $1.55 \times 10^{-19}$ | $5.82 \times 10^{-19}$ | $2.71 \times 10^{-18}$ |
| $A \cdot FSA$                         | $1.30 \times 10^{-22}$ | $2.15 \times 10^{-22}$ | $3.90 \times 10^{-22}$ |
| $(SA)_2$                              | $2.89 \times 10^{-15}$ | $2.56 \times 10^{-14}$ | $3.18 \times 10^{-13}$ |
| $(FSA)_2$                             | $3.48 \times 10^{-20}$ | $1.32 \times 10^{-19}$ | $6.21 \times 10^{-19}$ |
| $(SA)_2 \cdot A$                      | $4.87 \times 10^{-10}$ | $1.07 \times 10^{-8}$  | $3.78 \times 10^{-7}$  |
| $(SA)_2 \cdot (A)_2$                  | $2.13 \times 10^{-16}$ | $1.37 \times 10^{-15}$ | $1.19 \times 10^{-14}$ |
| $A \cdot (FSA)_2$                     | $1.73 \times 10^{-19}$ | $6.52 \times 10^{-19}$ | $3.02 \times 10^{-18}$ |
| $(A)_2 \cdot (FSA)_2$                 | $1.71 \times 10^{-20}$ | $5.12 \times 10^{-20}$ | $1.84 \times 10^{-19}$ |
| $SA \cdot A \cdot FSA$                | $1.76 \times 10^{-16}$ | $1.41 \times 10^{-15}$ | $1.58 \times 10^{-14}$ |
| $SA \cdot (A)_2 \cdot FSA$            | $3.57 \times 10^{-23}$ | $7.17 \times 10^{-23}$ | $1.62 \times 10^{-22}$ |

168 **Table S11.** Formation rate ( $J$ ,  $s^{-1}$ ) of FSA at  $T = 298.15$  K with  $[SA] = 10^4 - 10^8$  molecules $\cdot$ cm $^{-3}$ ,  $[A]$   
169  $= 10^7 - 10^{11}$  molecules $\cdot$ cm $^{-3}$ , and  $[FSA] = 10^3 - 10^7$  molecules $\cdot$ cm $^{-3}$ .

| [SA]          | [A]             | [FSA] = $10^3$         | [FSA] = $10^4$         | [FSA] = $10^5$         | [FSA] = $10^6$         | [FSA] = $10^7$         |
|---------------|-----------------|------------------------|------------------------|------------------------|------------------------|------------------------|
| [SA] = $10^4$ | [A] = $10^7$    | $6.44 \times 10^{-29}$ | $1.24 \times 10^{-27}$ | $7.22 \times 10^{-26}$ | $6.58 \times 10^{-24}$ | $5.53 \times 10^{-22}$ |
| [SA] = $10^4$ | [A] = $10^8$    | $6.44 \times 10^{-26}$ | $1.24 \times 10^{-24}$ | $7.22 \times 10^{-23}$ | $6.58 \times 10^{-21}$ | $5.53 \times 10^{-19}$ |
| [SA] = $10^4$ | [A] = $10^9$    | $6.42 \times 10^{-23}$ | $1.24 \times 10^{-21}$ | $7.20 \times 10^{-20}$ | $6.56 \times 10^{-18}$ | $5.51 \times 10^{-16}$ |
| [SA] = $10^4$ | [A] = $10^{10}$ | $6.22 \times 10^{-20}$ | $1.20 \times 10^{-18}$ | $7.00 \times 10^{-17}$ | $6.38 \times 10^{-15}$ | $5.34 \times 10^{-13}$ |
| [SA] = $10^4$ | [A] = $10^{11}$ | $4.80 \times 10^{-17}$ | $9.42 \times 10^{-16}$ | $5.56 \times 10^{-14}$ | $5.06 \times 10^{-12}$ | $4.09 \times 10^{-10}$ |
| [SA] = $10^5$ | [A] = $10^7$    | $5.94 \times 10^{-26}$ | $6.44 \times 10^{-25}$ | $1.24 \times 10^{-23}$ | $7.09 \times 10^{-22}$ | $5.57 \times 10^{-20}$ |
| [SA] = $10^5$ | [A] = $10^8$    | $5.94 \times 10^{-23}$ | $6.43 \times 10^{-22}$ | $1.24 \times 10^{-20}$ | $7.08 \times 10^{-19}$ | $5.57 \times 10^{-17}$ |
| [SA] = $10^5$ | [A] = $10^9$    | $5.92 \times 10^{-20}$ | $6.41 \times 10^{-19}$ | $1.24 \times 10^{-17}$ | $7.06 \times 10^{-16}$ | $5.55 \times 10^{-14}$ |
| [SA] = $10^5$ | [A] = $10^{10}$ | $5.74 \times 10^{-17}$ | $6.22 \times 10^{-16}$ | $1.20 \times 10^{-14}$ | $6.87 \times 10^{-13}$ | $5.38 \times 10^{-11}$ |
| [SA] = $10^5$ | [A] = $10^{11}$ | $4.43 \times 10^{-14}$ | $4.80 \times 10^{-13}$ | $9.39 \times 10^{-12}$ | $5.43 \times 10^{-10}$ | $4.11 \times 10^{-8}$  |
| [SA] = $10^6$ | [A] = $10^7$    | $6.86 \times 10^{-23}$ | $5.94 \times 10^{-22}$ | $6.42 \times 10^{-21}$ | $1.22 \times 10^{-19}$ | $6.00 \times 10^{-18}$ |
| [SA] = $10^6$ | [A] = $10^8$    | $6.86 \times 10^{-20}$ | $5.93 \times 10^{-19}$ | $6.42 \times 10^{-18}$ | $1.22 \times 10^{-16}$ | $6.00 \times 10^{-15}$ |
| [SA] = $10^6$ | [A] = $10^9$    | $6.84 \times 10^{-17}$ | $5.92 \times 10^{-16}$ | $6.40 \times 10^{-15}$ | $1.21 \times 10^{-13}$ | $5.98 \times 10^{-12}$ |
| [SA] = $10^6$ | [A] = $10^{10}$ | $6.66 \times 10^{-14}$ | $5.73 \times 10^{-13}$ | $6.20 \times 10^{-12}$ | $1.18 \times 10^{-10}$ | $5.78 \times 10^{-9}$  |
| [SA] = $10^6$ | [A] = $10^{11}$ | $5.33 \times 10^{-11}$ | $4.39 \times 10^{-10}$ | $4.74 \times 10^{-9}$  | $9.09 \times 10^{-8}$  | $4.39 \times 10^{-6}$  |
| [SA] = $10^7$ | [A] = $10^7$    | $1.67 \times 10^{-19}$ | $6.86 \times 10^{-19}$ | $5.93 \times 10^{-18}$ | $6.30 \times 10^{-17}$ | $1.03 \times 10^{-15}$ |
| [SA] = $10^7$ | [A] = $10^8$    | $1.67 \times 10^{-16}$ | $6.86 \times 10^{-16}$ | $5.92 \times 10^{-15}$ | $6.30 \times 10^{-14}$ | $1.03 \times 10^{-12}$ |
| [SA] = $10^7$ | [A] = $10^9$    | $1.67 \times 10^{-13}$ | $6.83 \times 10^{-13}$ | $5.90 \times 10^{-12}$ | $6.28 \times 10^{-11}$ | $1.02 \times 10^{-9}$  |
| [SA] = $10^7$ | [A] = $10^{10}$ | $1.64 \times 10^{-10}$ | $6.60 \times 10^{-10}$ | $5.66 \times 10^{-9}$  | $6.02 \times 10^{-8}$  | $9.80 \times 10^{-7}$  |
| [SA] = $10^7$ | [A] = $10^{11}$ | $1.48 \times 10^{-7}$  | $4.99 \times 10^{-7}$  | $4.04 \times 10^{-6}$  | $4.27 \times 10^{-5}$  | $6.92 \times 10^{-4}$  |
| [SA] = $10^8$ | [A] = $10^7$    | $1.15 \times 10^{-15}$ | $1.67 \times 10^{-15}$ | $6.86 \times 10^{-15}$ | $5.83 \times 10^{-14}$ | $5.37 \times 10^{-13}$ |
| [SA] = $10^8$ | [A] = $10^8$    | $1.15 \times 10^{-12}$ | $1.67 \times 10^{-12}$ | $6.85 \times 10^{-12}$ | $5.82 \times 10^{-11}$ | $5.36 \times 10^{-10}$ |
| [SA] = $10^8$ | [A] = $10^9$    | $1.15 \times 10^{-9}$  | $1.66 \times 10^{-9}$  | $6.76 \times 10^{-9}$  | $5.74 \times 10^{-8}$  | $5.29 \times 10^{-7}$  |
| [SA] = $10^8$ | [A] = $10^{10}$ | $1.14 \times 10^{-6}$  | $1.59 \times 10^{-6}$  | $6.03 \times 10^{-6}$  | $5.02 \times 10^{-5}$  | $4.67 \times 10^{-4}$  |
| [SA] = $10^8$ | [A] = $10^{11}$ | $1.12 \times 10^{-3}$  | $1.31 \times 10^{-3}$  | $3.26 \times 10^{-3}$  | $2.27 \times 10^{-2}$  | $2.15 \times 10^{-1}$  |

170 SA, A and FSA represent sulfuric acid, ammonia and formic sulfuric anhydride, respectively.



171 **Table S12.** Formation rate  $J$  ( $\text{s}^{-1}$ ) of FSA at  $T = 278.15$  K with  $[\text{SA}] = 10^4 - 10^8$  molecules $\cdot\text{cm}^{-3}$ ,  $[\text{A}]$   
 172  $= 10^7 - 10^{11}$  molecules $\cdot\text{cm}^{-3}$ , and  $[\text{FSA}] = 10^3 - 10^7$  molecules $\cdot\text{cm}^{-3}$

| [SA]          | [A]             | [FSA] = $10^3$         | [FSA] = $10^4$         | [FSA] = $10^5$         | [FSA] = $10^6$         | [FSA] = $10^7$         |
|---------------|-----------------|------------------------|------------------------|------------------------|------------------------|------------------------|
| [SA] = $10^4$ | [A] = $10^7$    | $1.92 \times 10^{-24}$ | $3.63 \times 10^{-23}$ | $2.09 \times 10^{-21}$ | $1.88 \times 10^{-19}$ | $1.44 \times 10^{-17}$ |
| [SA] = $10^4$ | [A] = $10^8$    | $1.90 \times 10^{-21}$ | $3.60 \times 10^{-20}$ | $2.08 \times 10^{-18}$ | $1.87 \times 10^{-16}$ | $1.43 \times 10^{-14}$ |
| [SA] = $10^4$ | [A] = $10^9$    | $1.78 \times 10^{-18}$ | $3.36 \times 10^{-17}$ | $1.95 \times 10^{-15}$ | $1.75 \times 10^{-13}$ | $1.34 \times 10^{-11}$ |
| [SA] = $10^4$ | [A] = $10^{10}$ | $1.07 \times 10^{-15}$ | $2.06 \times 10^{-14}$ | $1.22 \times 10^{-12}$ | $1.10 \times 10^{-10}$ | $8.28 \times 10^{-9}$  |
| [SA] = $10^4$ | [A] = $10^{11}$ | $2.52 \times 10^{-13}$ | $5.50 \times 10^{-12}$ | $3.77 \times 10^{-10}$ | $3.46 \times 10^{-8}$  | $2.46 \times 10^{-6}$  |
| [SA] = $10^5$ | [A] = $10^7$    | $2.00 \times 10^{-21}$ | $1.92 \times 10^{-20}$ | $3.61 \times 10^{-19}$ | $2.03 \times 10^{-17}$ | $1.45 \times 10^{-15}$ |
| [SA] = $10^5$ | [A] = $10^8$    | $1.99 \times 10^{-18}$ | $1.90 \times 10^{-17}$ | $3.59 \times 10^{-16}$ | $2.02 \times 10^{-14}$ | $1.44 \times 10^{-12}$ |
| [SA] = $10^5$ | [A] = $10^9$    | $1.87 \times 10^{-15}$ | $1.77 \times 10^{-14}$ | $3.35 \times 10^{-13}$ | $1.89 \times 10^{-11}$ | $1.35 \times 10^{-9}$  |
| [SA] = $10^5$ | [A] = $10^{10}$ | $1.23 \times 10^{-12}$ | $1.07 \times 10^{-11}$ | $2.05 \times 10^{-10}$ | $1.18 \times 10^{-8}$  | $8.33 \times 10^{-7}$  |
| [SA] = $10^5$ | [A] = $10^{11}$ | $4.73 \times 10^{-10}$ | $2.51 \times 10^{-9}$  | $5.46 \times 10^{-8}$  | $3.61 \times 10^{-6}$  | $2.46 \times 10^{-4}$  |
| [SA] = $10^6$ | [A] = $10^7$    | $4.55 \times 10^{-18}$ | $2.00 \times 10^{-17}$ | $1.91 \times 10^{-16}$ | $3.51 \times 10^{-15}$ | $1.57 \times 10^{-13}$ |
| [SA] = $10^6$ | [A] = $10^8$    | $4.54 \times 10^{-15}$ | $1.99 \times 10^{-14}$ | $1.90 \times 10^{-13}$ | $3.48 \times 10^{-12}$ | $1.56 \times 10^{-10}$ |
| [SA] = $10^6$ | [A] = $10^9$    | $4.42 \times 10^{-12}$ | $1.87 \times 10^{-11}$ | $1.76 \times 10^{-10}$ | $3.24 \times 10^{-9}$  | $1.45 \times 10^{-7}$  |
| [SA] = $10^6$ | [A] = $10^{10}$ | $3.77 \times 10^{-9}$  | $1.21 \times 10^{-8}$  | $1.05 \times 10^{-7}$  | $1.96 \times 10^{-6}$  | $8.84 \times 10^{-5}$  |
| [SA] = $10^6$ | [A] = $10^{11}$ | $3.01 \times 10^{-6}$  | $4.68 \times 10^{-6}$  | $2.44 \times 10^{-5}$  | $5.10 \times 10^{-4}$  | $2.53 \times 10^{-2}$  |
| [SA] = $10^7$ | [A] = $10^7$    | $3.03 \times 10^{-14}$ | $4.56 \times 10^{-14}$ | $2.00 \times 10^{-13}$ | $1.86 \times 10^{-12}$ | $2.70 \times 10^{-11}$ |
| [SA] = $10^7$ | [A] = $10^8$    | $3.03 \times 10^{-11}$ | $4.54 \times 10^{-11}$ | $1.98 \times 10^{-10}$ | $1.84 \times 10^{-9}$  | $2.68 \times 10^{-8}$  |
| [SA] = $10^7$ | [A] = $10^9$    | $3.01 \times 10^{-8}$  | $4.39 \times 10^{-8}$  | $1.83 \times 10^{-7}$  | $1.67 \times 10^{-6}$  | $2.45 \times 10^{-5}$  |
| [SA] = $10^7$ | [A] = $10^{10}$ | $2.94 \times 10^{-5}$  | $3.66 \times 10^{-5}$  | $1.09 \times 10^{-4}$  | $8.97 \times 10^{-4}$  | $1.34 \times 10^{-2}$  |
| [SA] = $10^7$ | [A] = $10^{11}$ | $2.83 \times 10^{-2}$  | $2.96 \times 10^{-2}$  | $4.26 \times 10^{-2}$  | $1.92 \times 10^{-1}$  | $3.08 \times 10^0$     |
| [SA] = $10^8$ | [A] = $10^7$    | $2.91 \times 10^{-10}$ | $3.07 \times 10^{-10}$ | $4.61 \times 10^{-10}$ | $1.97 \times 10^{-9}$  | $1.46 \times 10^{-8}$  |
| [SA] = $10^8$ | [A] = $10^8$    | $2.91 \times 10^{-7}$  | $3.06 \times 10^{-7}$  | $4.55 \times 10^{-7}$  | $1.92 \times 10^{-6}$  | $1.42 \times 10^{-5}$  |
| [SA] = $10^8$ | [A] = $10^9$    | $2.91 \times 10^{-4}$  | $3.02 \times 10^{-4}$  | $4.14 \times 10^{-4}$  | $1.52 \times 10^{-3}$  | $1.12 \times 10^{-2}$  |
| [SA] = $10^8$ | [A] = $10^{10}$ | $2.88 \times 10^{-1}$  | $2.91 \times 10^{-1}$  | $3.24 \times 10^{-1}$  | $6.47 \times 10^{-1}$  | $3.82 \times 10^0$     |
| [SA] = $10^8$ | [A] = $10^{11}$ | $2.69 \times 10^2$     | $2.69 \times 10^2$     | $2.74 \times 10^2$     | $3.15 \times 10^2$     | $7.56 \times 10^2$     |

173 SA, A and FSA represent sulfuric acid, ammonia and formic sulfuric anhydride, respectively

174 **Table S13.** Formation rate  $J$  ( $\text{s}^{-1}$ ) of FSA at  $T = 258.15$  K with  $[\text{SA}] = 10^4 - 10^8$  molecules $\cdot\text{cm}^{-3}$ ,  $[\text{A}]$   
175  $= 10^7 - 10^{11}$  molecules $\cdot\text{cm}^{-3}$ , and  $[\text{FSA}] = 10^3 - 10^7$  molecules $\cdot\text{cm}^{-3}$

| [SA]          | [A]             | [FSA] = $10^3$         | [FSA] = $10^4$         | [FSA] = $10^5$         | [FSA] = $10^6$         | [FSA] = $10^7$         |
|---------------|-----------------|------------------------|------------------------|------------------------|------------------------|------------------------|
| [SA] = $10^4$ | [A] = $10^7$    | $2.49 \times 10^{-20}$ | $4.64 \times 10^{-19}$ | $3.13 \times 10^{-17}$ | $2.89 \times 10^{-15}$ | $2.24 \times 10^{-13}$ |
| [SA] = $10^4$ | [A] = $10^8$    | $2.27 \times 10^{-17}$ | $4.23 \times 10^{-16}$ | $2.90 \times 10^{-14}$ | $2.69 \times 10^{-12}$ | $2.07 \times 10^{-10}$ |
| [SA] = $10^4$ | [A] = $10^9$    | $1.39 \times 10^{-14}$ | $2.62 \times 10^{-13}$ | $1.97 \times 10^{-11}$ | $1.85 \times 10^{-9}$  | $1.41 \times 10^{-7}$  |
| [SA] = $10^4$ | [A] = $10^{10}$ | $5.48 \times 10^{-12}$ | $1.16 \times 10^{-10}$ | $1.00 \times 10^{-8}$  | $9.48 \times 10^{-7}$  | $6.48 \times 10^{-5}$  |
| [SA] = $10^4$ | [A] = $10^{11}$ | $6.87 \times 10^{-10}$ | $3.11 \times 10^{-8}$  | $2.87 \times 10^{-6}$  | $2.35 \times 10^{-4}$  | $4.75 \times 10^{-3}$  |
| [SA] = $10^5$ | [A] = $10^7$    | $7.46 \times 10^{-17}$ | $2.49 \times 10^{-16}$ | $4.62 \times 10^{-15}$ | $3.03 \times 10^{-13}$ | $2.25 \times 10^{-11}$ |
| [SA] = $10^5$ | [A] = $10^8$    | $7.23 \times 10^{-14}$ | $2.27 \times 10^{-13}$ | $4.22 \times 10^{-12}$ | $2.81 \times 10^{-10}$ | $2.08 \times 10^{-8}$  |
| [SA] = $10^5$ | [A] = $10^9$    | $6.14 \times 10^{-11}$ | $1.39 \times 10^{-10}$ | $2.61 \times 10^{-9}$  | $1.91 \times 10^{-7}$  | $1.41 \times 10^{-5}$  |
| [SA] = $10^5$ | [A] = $10^{10}$ | $3.28 \times 10^{-8}$  | $5.47 \times 10^{-8}$  | $1.15 \times 10^{-6}$  | $9.57 \times 10^{-5}$  | $6.48 \times 10^{-3}$  |
| [SA] = $10^5$ | [A] = $10^{11}$ | $2.32 \times 10^{-6}$  | $6.82 \times 10^{-6}$  | $3.04 \times 10^{-4}$  | $2.36 \times 10^{-2}$  | $4.74 \times 10^{-1}$  |
| [SA] = $10^6$ | [A] = $10^7$    | $5.98 \times 10^{-13}$ | $7.46 \times 10^{-13}$ | $2.48 \times 10^{-12}$ | $4.47 \times 10^{-11}$ | $2.35 \times 10^{-9}$  |
| [SA] = $10^6$ | [A] = $10^8$    | $5.93 \times 10^{-10}$ | $7.22 \times 10^{-10}$ | $2.26 \times 10^{-9}$  | $4.06 \times 10^{-8}$  | $2.16 \times 10^{-6}$  |
| [SA] = $10^6$ | [A] = $10^9$    | $5.52 \times 10^{-7}$  | $6.12 \times 10^{-7}$  | $1.37 \times 10^{-6}$  | $2.48 \times 10^{-5}$  | $1.43 \times 10^{-3}$  |
| [SA] = $10^6$ | [A] = $10^{10}$ | $3.10 \times 10^{-4}$  | $3.23 \times 10^{-4}$  | $5.34 \times 10^{-4}$  | $1.07 \times 10^{-2}$  | $6.42 \times 10^{-1}$  |
| [SA] = $10^6$ | [A] = $10^{11}$ | $2.04 \times 10^{-2}$  | $2.22 \times 10^{-2}$  | $6.40 \times 10^{-2}$  | $2.41 \times 10^0$     | $4.69 \times 10^1$     |
| [SA] = $10^7$ | [A] = $10^7$    | $5.84 \times 10^{-9}$  | $5.98 \times 10^{-9}$  | $7.49 \times 10^{-9}$  | $2.45 \times 10^{-8}$  | $3.42 \times 10^{-7}$  |
| [SA] = $10^7$ | [A] = $10^8$    | $5.79 \times 10^{-6}$  | $5.91 \times 10^{-6}$  | $7.19 \times 10^{-6}$  | $2.16 \times 10^{-5}$  | $3.02 \times 10^{-4}$  |
| [SA] = $10^7$ | [A] = $10^9$    | $5.36 \times 10^{-3}$  | $5.41 \times 10^{-3}$  | $5.93 \times 10^{-3}$  | $1.23 \times 10^{-2}$  | $1.68 \times 10^{-1}$  |
| [SA] = $10^7$ | [A] = $10^{10}$ | $2.65 \times 10^0$     | $2.66 \times 10^0$     | $2.75 \times 10^0$     | $4.29 \times 10^0$     | $6.18 \times 10^1$     |
| [SA] = $10^7$ | [A] = $10^{11}$ | $1.35 \times 10^2$     | $1.36 \times 10^2$     | $1.46 \times 10^2$     | $3.68 \times 10^2$     | $4.30 \times 10^3$     |
| [SA] = $10^8$ | [A] = $10^7$    | $5.80 \times 10^{-5}$  | $5.82 \times 10^{-5}$  | $6.00 \times 10^{-5}$  | $7.76 \times 10^{-5}$  | $2.31 \times 10^{-4}$  |
| [SA] = $10^8$ | [A] = $10^8$    | $5.66 \times 10^{-2}$  | $5.68 \times 10^{-2}$  | $5.79 \times 10^{-2}$  | $6.93 \times 10^{-2}$  | $1.76 \times 10^{-1}$  |
| [SA] = $10^8$ | [A] = $10^9$    | $4.47 \times 10^1$     | $4.47 \times 10^1$     | $4.50 \times 10^1$     | $4.75 \times 10^1$     | $7.52 \times 10^1$     |
| [SA] = $10^8$ | [A] = $10^{10}$ | $8.29 \times 10^3$     | $8.29 \times 10^3$     | $8.30 \times 10^3$     | $8.46 \times 10^3$     | $1.13 \times 10^4$     |
| [SA] = $10^8$ | [A] = $10^{11}$ | $1.57 \times 10^5$     | $1.58 \times 10^5$     | $1.58 \times 10^5$     | $1.63 \times 10^5$     | $2.94 \times 10^5$     |

176 SA, A and FSA represent sulfuric acid, ammonia and formic sulfuric anhydride, respectively

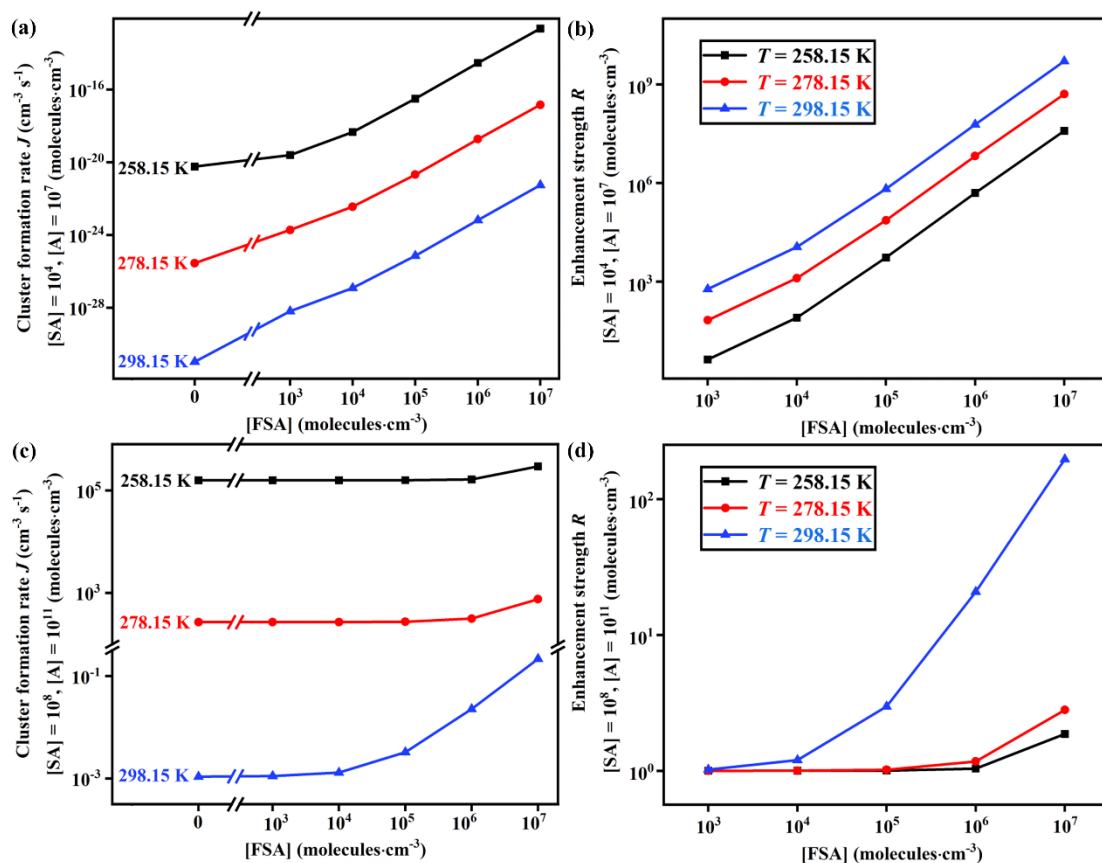

**Fig. S11.** (a) Cluster formation rate ( $J$ , cm<sup>3</sup> s<sup>-1</sup>) and (b) enhancement factor ( $R$ ) with  $[SA] = 10^4$  molecules·cm<sup>-3</sup>,  $[A] = 10^7$  molecules·cm<sup>-3</sup> at three temperatures, (c) Cluster formation rate ( $J$ , cm<sup>3</sup> s<sup>-1</sup>) and (d) enhancement factor ( $R$ ) with  $[SA] = 10^8$  molecules·cm<sup>-3</sup>,  $[A] = 10^{11}$  molecules·cm<sup>-3</sup> at three temperatures (black: 258.15 K, red: 278.15 K, blue: 298.15 K)

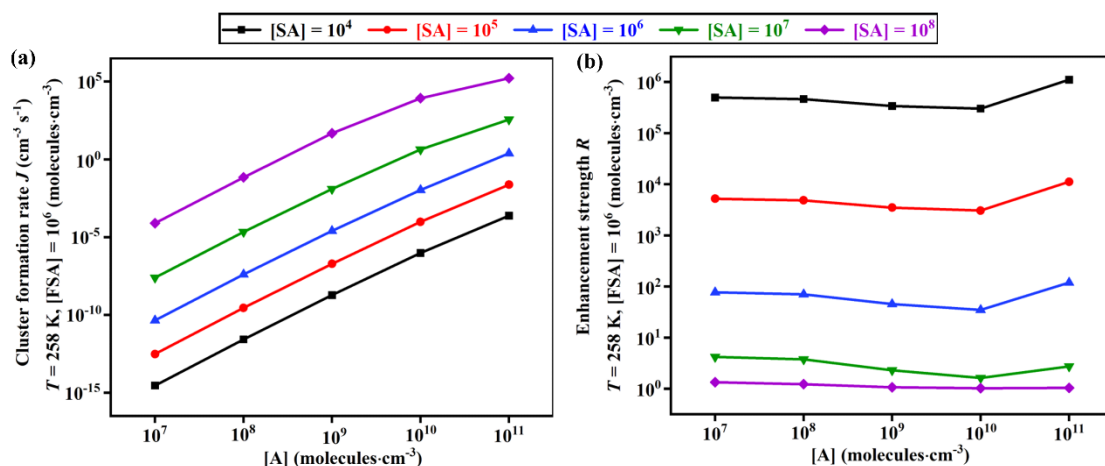

**Fig. S12.** (a) Cluster formation rate ( $J$ , cm<sup>3</sup> s<sup>-1</sup>) and (b) enhancement factor ( $R$ ) as a function of  $[A]$  with  $[FSA] = 10^6$  molecules·cm<sup>-3</sup> and five different  $[SA]$  concentrations (black:  $[SA] = 10^4$  molecules·cm<sup>-3</sup>, red:  $[SA] = 10^5$  molecules·cm<sup>-3</sup>, blue:  $[SA] = 10^6$  molecules·cm<sup>-3</sup>, green:  $[SA] = 10^7$  molecules·cm<sup>-3</sup>, purple:  $[SA] = 10^8$  molecules·cm<sup>-3</sup>) at 258.15 K

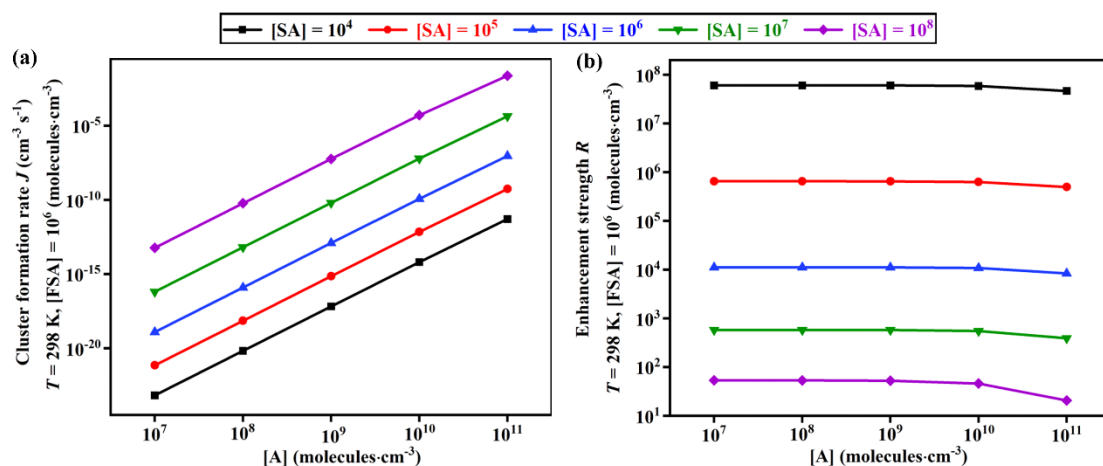

**Fig. S13.** (a) Cluster formation rate ( $J$ , cm<sup>3</sup> s<sup>-1</sup>) and (b) enhancement factor ( $R$ ) as a function of  $[A]$  with  $[FSA] = 10^6$  molecules·cm<sup>-3</sup> and five different  $[SA]$  concentrations (black:  $[SA] = 10^4$  molecules·cm<sup>-3</sup>, red:  $[SA] = 10^5$  molecules·cm<sup>-3</sup>, blue:  $[SA] = 10^6$  molecules·cm<sup>-3</sup>, green:  $[SA] = 10^7$  molecules·cm<sup>-3</sup>, purple:  $[SA] = 10^8$  molecules·cm<sup>-3</sup>) at 298.15 K

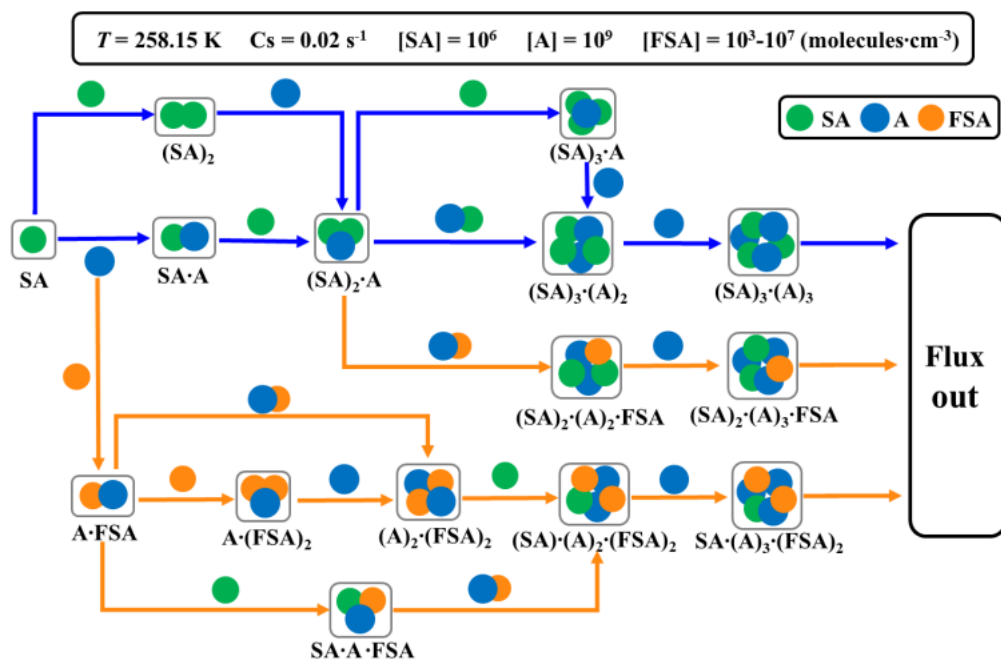

**Fig. S14.** Main pathways of clusters growth under conditions of  $T = 258.15 \text{ K}$ ,  $[\text{SA}] = 10^6 \text{ molecules}\cdot\text{cm}^{-3}$ ,  $[\text{A}] = 10^9 \text{ molecules}\cdot\text{cm}^{-3}$ , and  $[\text{FSA}] = 10^3\text{-}10^7 \text{ molecules}\cdot\text{cm}^{-3}$ . Blue and orange fluxes represent the pathways of the SA-A-based and SA-A-FSA-based cluster, respectively

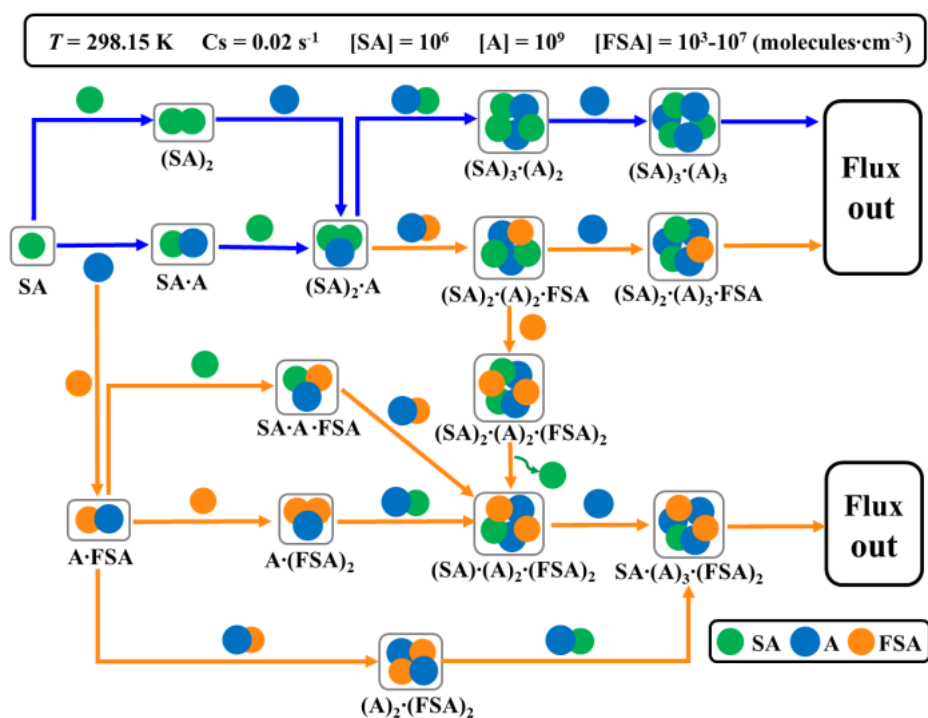

**Fig. S15.** Main pathways of clusters growth under conditions of  $T = 298.15 \text{ K}$ ,  $[\text{SA}] = 10^6$  molecules·cm<sup>-3</sup>,  $[\text{A}] = 10^9$  molecules·cm<sup>-3</sup>, and  $[\text{FSA}] = 10^3\text{-}10^7$  molecules·cm<sup>-3</sup>. The blue and orange fluxes represent the pathways of the SA-A-based and SA-A-FSA-based cluster, respectively

**Table S14.** Cartesian coordinates of all molecules and clusters in this study

SA

| Atom | X           | Y           | Z           |
|------|-------------|-------------|-------------|
| S    | -0.00000100 | 0.00000200  | -0.15545600 |
| O    | 0.65765000  | -1.06508500 | -0.82224200 |
| O    | -0.65766000 | 1.06510800  | -0.82220400 |
| O    | 1.02424100  | 0.67764400  | 0.84020100  |
| O    | -1.02423000 | -0.67766800 | 0.84019400  |
| H    | 1.69311900  | 0.03016000  | 1.09984500  |
| H    | -1.69310700 | -0.03019100 | 1.09986300  |

A

| Atom | X           | Y           | Z           |
|------|-------------|-------------|-------------|
| N    | 0.00000000  | 0.11213000  | 0.00000000  |
| H    | -0.94020500 | -0.26169700 | 0.00000000  |
| H    | 0.47010300  | -0.26160800 | 0.81428100  |
| H    | 0.47010300  | -0.26160800 | -0.81428100 |

FSA

| Atom | X           | Y           | Z           |
|------|-------------|-------------|-------------|
| S    | -0.73245600 | -0.00003100 | 0.084092000 |
| O    | -1.86438700 | -0.67719800 | -0.41027000 |
| O    | -0.37942100 | 1.13847800  | -0.92486400 |
| O    | -0.61218900 | 0.46342500  | 1.41730000  |
| O    | 1.78817900  | -0.59587800 | -0.05562900 |
| H    | 0.51177600  | -1.04252700 | -0.16626600 |
| C    | 2.47070900  | -1.44826000 | -0.09353000 |
| H    | 2.10711400  | 0.54561400  | 0.04517600  |
| O    | 0.41637300  | 1.60168100  | -0.60677600 |

SA·A

| Atom | X           | Y           | Z           |
|------|-------------|-------------|-------------|
| S    | -0.59827600 | -0.11336800 | 0.08617500  |
| O    | 0.10893200  | -0.09214100 | 1.32834700  |
| O    | -1.74906500 | -0.92894600 | -0.10565200 |
| O    | 0.39576600  | -0.37422800 | -1.06128100 |
| O    | -1.03681100 | 1.39710200  | -0.16132600 |
| H    | 1.37463300  | -0.19089300 | -0.73462700 |
| H    | -1.78503200 | 1.40349300  | -0.77106700 |
| N    | 2.73855300  | 0.04357600  | -0.05140800 |
| H    | 3.20053200  | 0.91724700  | -0.27070200 |
| H    | 3.40981800  | -0.70549900 | -0.16620600 |



|     |                    |      |             |             |             |
|-----|--------------------|------|-------------|-------------|-------------|
| 209 |                    | H    | 2.45200800  | 0.07021600  | 0.92295000  |
| 210 | FSA·A              |      |             |             |             |
|     |                    | Atom | X           | Y           | Z           |
|     |                    | S    | -2.06986300 | -1.43720000 | -0.02487300 |
|     |                    | O    | -2.28947300 | -0.45708400 | 0.19881300  |
|     |                    | O    | -1.74977800 | -1.89068700 | 0.82786100  |
|     |                    | O    | -2.84681600 | -1.92440600 | -0.45419300 |
|     |                    | O    | 0.87085200  | -0.31194100 | 0.02282000  |
|     |                    | H    | 2.28806200  | -0.35459200 | -0.03984100 |
|     |                    | H    | 0.16258200  | -0.81847000 | -1.16009200 |
|     |                    | N    | 0.21548900  | -0.69441000 | 1.25156800  |
|     |                    | H    | -0.61216000 | 1.88395400  | -0.03391400 |
|     |                    | H    | 0.60096100  | 1.37010700  | -0.07332800 |
|     |                    | C    | -0.55396200 | 2.97630800  | -0.08844400 |
|     |                    | H    | -1.65868000 | 1.29398800  | 0.04496400  |
|     |                    | O    | -1.19891900 | -1.32936600 | -0.65773400 |
| 211 |                    |      |             |             |             |
| 212 | (SA) <sub>2</sub>  |      |             |             |             |
|     |                    | Atom | X           | Y           | Z           |
|     |                    | S    | 2.03944100  | 0.07517400  | 0.11329500  |
|     |                    | O    | 1.06831400  | -0.09670000 | 1.16086600  |
|     |                    | O    | 3.31172000  | 0.62626400  | 0.39691600  |
|     |                    | O    | 2.20680700  | -1.37335100 | -0.48979500 |
|     |                    | H    | 2.98774000  | -1.40489100 | -1.05933100 |
|     |                    | O    | 1.41198000  | 0.87974800  | -1.04535300 |
|     |                    | H    | 0.44673500  | 0.64256800  | -1.15033500 |
|     |                    | O    | -1.06831700 | 0.09668400  | -1.16087000 |
|     |                    | S    | -2.03944300 | -0.07517400 | -0.11329500 |
|     |                    | O    | -1.41198700 | -0.87975200 | 1.04535400  |
|     |                    | O    | -3.31172900 | -0.62625000 | -0.39691000 |
|     |                    | O    | -2.20678900 | 1.37335500  | 0.48979100  |
|     |                    | H    | -0.44674000 | -0.64257900 | 1.15033500  |
|     |                    | H    | -2.98771900 | 1.40490700  | 1.05933100  |
| 213 |                    |      |             |             |             |
| 214 | (FSA) <sub>2</sub> |      |             |             |             |
|     |                    | Atom | X           | Y           | Z           |
|     |                    | S    | -2.10673800 | -0.64032400 | -0.24218500 |
|     |                    | O    | -3.16703900 | -1.51334400 | -0.55398700 |
|     |                    | O    | -1.52529400 | -0.99650900 | 1.13623900  |
|     |                    | O    | -1.04397200 | -0.39901200 | -1.17532800 |
|     |                    | C    | -2.13419400 | 1.83567000  | 0.56745300  |

|   |             |             |             |
|---|-------------|-------------|-------------|
| O | -2.82560300 | 0.78565000  | 0.01405000  |
| H | -2.78175100 | 2.71571600  | 0.54331000  |
| O | -1.03853400 | 1.77228500  | 1.00367700  |
| H | -0.58548000 | -0.67711000 | 1.22411800  |
| S | 2.10673800  | -0.64032400 | 0.24218400  |
| O | 3.16703900  | -1.51334400 | 0.55398700  |
| O | 1.52529400  | -0.99650900 | -1.13623900 |
| O | 1.04397200  | -0.39901200 | 1.17532900  |
| C | 2.13419400  | 1.83567000  | -0.56745300 |
| O | 2.82560300  | 0.78565000  | -0.01405100 |
| H | 2.78175100  | 2.71571600  | -0.54331100 |
| O | 1.03853300  | 1.77228500  | -1.00367600 |
| H | 0.58547900  | -0.67711100 | -1.22411600 |

215

216 SA·FSA

| Atom | X           | Y           | Z           |
|------|-------------|-------------|-------------|
| S    | 2.22843800  | -0.00423900 | 0.07863900  |
| O    | 3.23791900  | 0.97524400  | 0.24010300  |
| O    | 1.27077300  | -0.25369000 | 1.12244200  |
| O    | 2.90768300  | -1.40834000 | -0.15214600 |
| O    | 1.49401400  | 0.26141300  | -1.25288200 |
| H    | 3.74994700  | -1.28862800 | -0.61125600 |
| H    | 0.56250200  | -0.08538900 | -1.23312600 |
| S    | -1.93817600 | -0.60901300 | -0.05970300 |
| O    | -3.06674300 | -1.45127200 | -0.05756800 |
| O    | -1.24859400 | -0.62326500 | 1.30624500  |
| O    | -0.95965800 | -0.70137600 | -1.10956400 |
| C    | -1.73682200 | 1.97561700  | -0.03610200 |
| O    | -2.56398900 | 0.88882400  | -0.12069700 |
| H    | -2.34435400 | 2.88083400  | -0.11348900 |
| O    | -0.56291500 | 1.92177700  | 0.10376500  |
| H    | -0.25926600 | -0.42300400 | 1.23392100  |

217

218 (SA)<sub>2</sub>·A

| Atom | X           | Y           | Z           |
|------|-------------|-------------|-------------|
| S    | -1.77231300 | -0.34077900 | -0.04909000 |
| O    | -1.07131700 | 0.16352900  | 1.14296700  |
| O    | -0.99847000 | -1.34675900 | -0.75741300 |
| O    | -3.07876600 | -1.07528900 | 0.45986500  |
| H    | -2.85067000 | -1.96938800 | 0.74413600  |
| O    | -2.28848200 | 0.74869000  | -0.85700500 |
| H    | -1.40689900 | 2.09302200  | -0.44210900 |
| O    | 1.42804700  | 1.08270500  | -0.53209900 |

|   |             |             |             |
|---|-------------|-------------|-------------|
| S | 2.06372500  | -0.11895200 | -0.01742600 |
| O | 1.43416000  | -0.42809800 | 1.36683400  |
| O | 3.47167000  | -0.14405700 | 0.10310200  |
| O | 1.62893900  | -1.30669600 | -0.91181400 |
| H | 0.44446700  | -0.24695300 | 1.34915800  |
| H | 0.63395000  | -1.35519900 | -0.95819300 |
| N | -0.64527900 | 2.68400200  | -0.01766800 |
| H | 0.24045900  | 2.13587500  | -0.15608200 |
| H | -0.82981700 | 2.75595300  | 0.97931500  |
| H | -0.58337400 | 3.60217400  | -0.44379900 |

219

220 SA·A·FSA

| Atom | X           | Y           | Z           |
|------|-------------|-------------|-------------|
| S    | 0.55397800  | 2.48299400  | -0.70439700 |
| O    | 0.45073600  | 3.03570100  | 0.14224400  |
| O    | -0.24090200 | 1.81899900  | -0.72850000 |
| O    | 0.55144200  | 3.07525400  | -1.52784700 |
| O    | 2.13527700  | -0.46863900 | -0.40785800 |
| H    | 3.00805500  | -1.52978200 | -0.75383900 |
| H    | 2.68481300  | 0.87791700  | -0.40902500 |
| N    | 0.80219000  | -0.48805700 | -1.02270300 |
| H    | 1.05345300  | 0.02665000  | 1.93691500  |
| H    | 1.81162200  | -0.79790800 | 1.20606800  |
| S    | 0.96935400  | -0.36474900 | 2.95539900  |
| O    | 0.53492900  | 1.03427100  | 1.55561300  |
| O    | 1.44609600  | 1.92109200  | -0.62581400 |
| O    | -2.37916900 | -0.14053600 | -0.01737800 |
| O    | -1.84312000 | 1.07847500  | -0.55578700 |
| H    | -3.21751400 | -0.11977900 | 1.12909100  |
| H    | -1.25121700 | -1.15558600 | 0.21694100  |
| C    | -3.19108800 | -0.76047000 | -1.22541400 |
| H    | -0.40838300 | -0.93672100 | -0.33532800 |
| O    | -3.77401000 | -1.45628600 | -0.89463100 |

221

222 (FSA)<sub>2</sub>·A

| Atom | X          | Y           | Z           |
|------|------------|-------------|-------------|
| N    | 0.53599000 | 1.62901700  | 1.53538100  |
| H    | 1.33593800 | 1.86879000  | 0.92730000  |
| H    | 0.73156800 | 0.67470000  | 1.86455300  |
| H    | 0.44707100 | 2.27841600  | 2.30898800  |
| S    | 1.82396600 | -0.88183100 | -0.13231500 |
| O    | 1.80719000 | -2.19493100 | -0.66933400 |
| O    | 0.78405400 | 0.02834200  | -0.65823700 |

|   |             |             |             |
|---|-------------|-------------|-------------|
| O | 2.03005200  | -0.70863300 | 1.28211100  |
| C | 3.54095800  | 1.04184400  | -0.61837800 |
| O | 3.20543000  | -0.22448100 | -0.83384200 |
| H | 4.47964800  | 1.26606200  | -1.13446400 |
| O | 2.93793700  | 1.85135900  | 0.03095800  |
| H | -0.33133500 | 1.59116000  | 0.97715900  |
| S | -2.52000400 | 0.36564800  | -0.62012600 |
| O | -3.66487200 | 0.56839600  | -1.41984700 |
| O | -1.50362100 | -0.51119700 | -1.31541400 |
| O | -1.89506900 | 1.47643000  | 0.04285400  |
| C | -2.24247400 | -1.05306800 | 1.54702500  |
| O | -3.07199100 | -0.63666600 | 0.56714800  |
| H | -2.78840400 | -1.72915800 | 2.21135200  |
| O | -1.10228300 | -0.73486600 | 1.67210600  |
| H | -0.49533300 | -0.33683700 | -1.02340400 |

223

224 (SA)<sub>3</sub>

| Atom | X           | Y           | Z           |
|------|-------------|-------------|-------------|
| S    | 0.17750700  | 1.30695000  | -0.05944900 |
| O    | -0.09390200 | 0.06719200  | -0.78009000 |
| O    | 1.37463700  | 1.98332600  | -0.44312400 |
| H    | 3.10843900  | 1.28610800  | -0.37359300 |
| O    | 0.17205700  | 0.99707200  | 1.45713200  |
| O    | -1.00451000 | 2.25666600  | -0.18455500 |
| O    | 3.82087700  | 0.61891100  | -0.31555500 |
| S    | 3.23113400  | -0.76663900 | 0.09084400  |
| O    | 4.31169100  | -1.65664100 | 0.25254200  |
| O    | 2.42122500  | -1.20817600 | -1.17323700 |
| O    | -2.41639300 | -1.20536900 | -1.04774400 |
| H    | 1.51320800  | -0.84728200 | -1.14877900 |
| H    | -1.52390100 | -0.77676800 | -0.99149200 |
| O    | 2.28428500  | -0.56330900 | 1.16270100  |
| O    | -3.14100400 | 0.86502300  | 0.01296900  |
| H    | 0.93006700  | 0.38422300  | 1.63170700  |
| H    | -1.88155500 | 1.76156800  | -0.09917000 |
| O    | -4.69818200 | -1.03136200 | -0.32527500 |
| S    | -3.39889000 | -0.55000200 | -0.04775200 |
| O    | -2.91048600 | -1.08369200 | 1.35077700  |
| H    | -3.26462400 | -1.96992300 | 1.51070800  |

225

226 (FSA)<sub>3</sub>

| Atom | X           | Y           | Z           |
|------|-------------|-------------|-------------|
| S    | -3.23194400 | -0.59637700 | -0.25851000 |

|   |             |             |             |
|---|-------------|-------------|-------------|
| O | -4.51319100 | -0.86236400 | -0.79376300 |
| O | -2.16008800 | -1.00223500 | -1.29416100 |
| O | -2.89865700 | 0.66721800  | 0.37672000  |
| C | -1.85890000 | -1.89976900 | 1.47204800  |
| O | -3.06403200 | -1.70774200 | 0.87655800  |
| H | -1.98901700 | -2.60927700 | 2.25876100  |
| O | -0.84291000 | -1.38849500 | 1.16683800  |
| H | -1.29933600 | -0.54007000 | -1.10837700 |
| S | 0.10009300  | 2.06276100  | -0.68190000 |
| O | 0.68944600  | 2.80847500  | -1.72092700 |
| O | -1.24487000 | 2.69328800  | -0.27988000 |
| O | -0.06913400 | 0.63672600  | -0.77376700 |
| C | 0.63470800  | 1.90232600  | 1.85577600  |
| O | 1.02955900  | 2.34576900  | 0.60712100  |
| H | 1.44694200  | 2.12286300  | 2.55616800  |
| O | -0.41216400 | 1.38226800  | 2.09994300  |
| H | -1.84632800 | 2.00376500  | 0.11677500  |
| S | 3.07446000  | -0.57195000 | 0.10911000  |
| O | 4.22086400  | -0.50151200 | 0.92477800  |
| O | 1.84116100  | -0.60394300 | 1.05586400  |
| O | 2.81545200  | 0.29037500  | -0.98445400 |
| C | 2.06960000  | -2.60418700 | -1.11004100 |
| O | 3.15002600  | -2.10354300 | -0.48818400 |
| H | 2.36905000  | -3.56437900 | -1.57315100 |
| O | 0.97890500  | -2.08765900 | -1.12358800 |
| H | 1.00155600  | -0.64709400 | 0.55113200  |

227

228 (SA)<sub>2</sub>·FSA

| Atom | X           | Y           | Z           |
|------|-------------|-------------|-------------|
| S    | 0.31393300  | 0.27128100  | 0.80272400  |
| O    | 1.41010300  | 1.14724900  | 1.09984700  |
| O    | -0.86402600 | 0.38006700  | 1.61620000  |
| O    | 0.76621500  | 0.97877800  | -0.09423400 |
| O    | -0.03223000 | -1.06706500 | -0.95553900 |
| H    | 1.68969000  | -1.50955800 | -0.84556300 |
| H    | -0.90520200 | -1.19916600 | 0.89051400  |
| S    | -3.54538300 | 0.50006100  | -0.68317400 |
| O    | -4.49435400 | -1.30305700 | 0.52329200  |
| O    | -3.27097300 | 0.08072500  | -0.90098400 |
| O    | -2.31119600 | -0.76729700 | -0.24322500 |
| C    | -3.72422400 | -1.80240900 | -0.34368500 |
| O    | -4.34249300 | -0.42685700 | 1.22451000  |
| H    | -4.41327900 | -0.82986600 | -0.97754600 |

|   |             |             |             |
|---|-------------|-------------|-------------|
| O | -2.62724100 | 1.77061100  | -0.73336400 |
| H | -2.33757500 | 0.55060600  | -0.76049900 |
| S | 4.17910500  | 2.51668200  | -1.13704700 |
| O | 5.55665000  | 1.96342400  | -0.33226800 |
| O | 3.19718500  | -0.06954300 | 1.36773100  |
| O | 3.73034400  | -0.24299300 | -0.32449600 |
| O | 3.99097900  | -0.56491400 | -0.36294300 |
| H | 4.45057900  | -1.25396600 | -0.04119100 |
| H | 3.02693100  | 0.34216500  | -1.71845100 |

229

230

SA·(FSA)<sub>2</sub>

| Atom | X           | Y           | Z           |
|------|-------------|-------------|-------------|
| S    | 0.00000300  | -0.00002800 | 0.64830500  |
| O    | -0.75790100 | 0.97127900  | -0.09591600 |
| O    | 0.75794500  | -0.97141300 | -0.09578700 |
| O    | -0.93532600 | -0.74113000 | 1.61626600  |
| O    | 0.93529600  | 0.74117800  | 1.61622700  |
| H    | -1.89125600 | -0.51059200 | 1.45471200  |
| H    | 1.89122100  | 0.51056900  | 1.45478500  |
| S    | 4.12652700  | -0.41133700 | 0.05570600  |
| O    | 5.38190600  | -1.04011800 | 0.15954000  |
| O    | 3.18315600  | -1.22394000 | -0.83248000 |
| O    | 3.43564500  | 0.04122300  | 1.23295100  |
| C    | 3.38169200  | 1.71437500  | -1.22313300 |
| O    | 4.41750700  | 0.90281500  | -0.85685100 |
| H    | 3.78099100  | 2.54795700  | -1.80636700 |
| O    | 2.24469900  | 1.52681200  | -0.94873200 |
| H    | 2.21091700  | -1.07916900 | -0.58578700 |
| S    | -4.12653200 | 0.41133400  | 0.05572300  |
| O    | -5.38190500 | 1.04011300  | 0.15962200  |
| O    | -3.18316800 | 1.22400700  | -0.83241000 |
| O    | -3.43564800 | -0.04131800 | 1.23293200  |
| C    | -3.38168200 | -1.71429500 | -1.22323100 |
| O    | -4.41750600 | -0.90274600 | -0.85692800 |
| H    | -3.78097400 | -2.54781300 | -1.80656000 |
| O    | -2.24470000 | -1.52677500 | -0.94875300 |
| H    | -2.21093000 | 1.07916500  | -0.58578600 |

231

232

(SA)<sub>2</sub>·(A)<sub>2</sub>

| Atom | X           | Y           | Z           |
|------|-------------|-------------|-------------|
| S    | -2.06184100 | 0.03024000  | -0.13465200 |
| O    | -2.04117600 | 1.44224200  | 0.23783700  |
| O    | -3.44180400 | -0.18999500 | -0.89528300 |

|   |             |             |             |
|---|-------------|-------------|-------------|
| O | -1.07447700 | -0.35111100 | -1.12711700 |
| O | -2.07527000 | -0.85956100 | 1.02215600  |
| H | -0.62565200 | 2.17366500  | 0.71126100  |
| H | -4.16339900 | 0.11236500  | -0.33044200 |
| S | 2.14824600  | -0.06917100 | -0.20933500 |
| O | 1.98617900  | -1.44915800 | -0.67010100 |
| O | 1.31072900  | 0.84270300  | -1.21025200 |
| O | 1.44496800  | 0.08726200  | 1.09667700  |
| O | 3.46837600  | 0.47040600  | -0.23135200 |
| H | 0.82649800  | -2.09927000 | 0.18550400  |
| H | 0.42274300  | 0.42956900  | -1.33621000 |
| N | 0.16605000  | -2.42220400 | 0.96179200  |
| H | -0.03648600 | -3.41297000 | 0.89015000  |
| H | 0.64646900  | -2.21664600 | 1.83389300  |
| H | -0.71778100 | -1.86109400 | 0.94374900  |
| N | 0.35020200  | 2.43893700  | 0.98896700  |
| H | 0.35301500  | 3.05370700  | 1.79434900  |
| H | 0.86196200  | 1.50602200  | 1.17669400  |
| H | 0.81620300  | 2.87810800  | 0.19901900  |

233

234 SA·(A)<sub>2</sub>·FSA

| Atom | X           | Y           | Z           |
|------|-------------|-------------|-------------|
| N    | -0.56014400 | -2.50162300 | -1.18465600 |
| H    | -0.51312700 | -3.31715500 | -0.58087000 |
| H    | 0.24189900  | -1.86322200 | -0.91499800 |
| H    | -0.49089300 | -2.76590600 | -2.16129700 |
| S    | -2.01210800 | 0.36785000  | -0.31238200 |
| O    | -2.62217700 | 1.67359200  | -0.33240400 |
| O    | -2.86486200 | -0.78410300 | -0.47660100 |
| O    | -0.76692500 | 0.28066100  | -1.05249400 |
| C    | -0.91367900 | -0.71721100 | 1.84228300  |
| O    | -1.51723600 | 0.35112600  | 1.30152900  |
| H    | -0.57047200 | -0.46665600 | 2.84999400  |
| O    | -0.78402900 | -1.78897100 | 1.33362300  |
| H    | -1.44645400 | -2.00919800 | -0.99711800 |
| S    | 2.27254000  | -0.09072400 | 0.06125900  |
| O    | 1.71174100  | -1.31696200 | -0.48662400 |
| O    | 3.65606800  | -0.17762300 | 0.42225600  |
| O    | 1.39806600  | 0.55074600  | 1.04932200  |
| O    | 2.21153500  | 0.99868500  | -1.15471900 |
| H    | 0.58368300  | 1.79927500  | 0.53551600  |
| H    | 3.04161700  | 0.92588300  | -1.63930400 |
| N    | 0.14155800  | 2.61144100  | -0.00672300 |

|   |             |            |             |
|---|-------------|------------|-------------|
| H | 0.55313300  | 3.49885700 | 0.25954500  |
| H | -0.88044200 | 2.61495600 | 0.10152100  |
| H | 0.34885200  | 2.38648600 | -0.98017800 |

235

236 (A)<sub>2</sub>·(FSA)<sub>2</sub>

| Atom | X           | Y           | Z           |
|------|-------------|-------------|-------------|
| N    | 0.51148200  | 2.21605000  | 0.26359000  |
| H    | 1.25940400  | 2.30709700  | -0.42793300 |
| H    | 0.90111700  | 1.54792200  | 0.95568500  |
| H    | 0.28671200  | 3.11166600  | 0.68183300  |
| S    | 2.00305500  | -0.65065500 | 0.17540100  |
| O    | 1.96884000  | -2.07899400 | 0.23914100  |
| O    | 1.28396600  | -0.07317100 | -0.95522100 |
| O    | 1.80990200  | 0.07670500  | 1.41292700  |
| C    | 4.01436400  | 0.89889400  | -0.42278200 |
| O    | 3.61354300  | -0.35473100 | -0.20718100 |
| H    | 5.08904000  | 0.90567600  | -0.63275600 |
| O    | 3.33419100  | 1.88415700  | -0.40110200 |
| H    | -0.32876000 | 1.77240300  | -0.18012500 |
| S    | -2.85590100 | 0.42548300  | -0.36412200 |
| O    | -3.93486700 | 1.34816000  | -0.43110200 |
| O    | -3.12220300 | -0.94470500 | -0.76286000 |
| O    | -1.56411400 | 0.89502700  | -0.85432000 |
| C    | -1.73688800 | -0.53841800 | 1.81611900  |
| O    | -2.61719500 | 0.32824700  | 1.31127800  |
| H    | -1.77253100 | -0.50324200 | 2.91060600  |
| O    | -1.00327200 | -1.24862300 | 1.19472600  |
| H    | -1.64200600 | -1.71722000 | -1.14245700 |
| N    | -0.65735500 | -1.99590300 | -1.35904500 |
| H    | -0.07627600 | -1.13464800 | -1.37477700 |
| H    | -0.58601000 | -2.49305000 | -2.23965100 |
| H    | -0.27922600 | -2.55431300 | -0.59300400 |

237

238 (SA)<sub>3</sub>·A

| Atom | X           | Y           | Z           |
|------|-------------|-------------|-------------|
| N    | -0.08306900 | 0.43034300  | 2.52884500  |
| H    | -0.96686500 | 0.21892000  | 2.01889600  |
| H    | 0.62338000  | -0.24748900 | 2.20270400  |
| H    | -0.22034100 | 0.36070000  | 3.53139300  |
| S    | 1.14064300  | 1.97416100  | -0.15831000 |
| O    | 0.06648000  | 0.98458200  | -0.29616000 |
| O    | 1.25367800  | 2.50665600  | 1.17335800  |
| H    | 0.26824900  | 1.36202900  | 2.25930200  |



|   |             |             |             |
|---|-------------|-------------|-------------|
| O | 2.38467600  | 1.45066900  | -0.74121700 |
| S | -2.89899900 | -0.31614900 | -0.11437500 |
| O | -2.20892100 | -1.35592600 | -1.04413200 |
| O | -2.49532900 | 1.05527200  | -0.72151700 |
| O | -4.29806300 | -0.45733500 | -0.25192500 |
| O | -2.29521200 | -0.43001100 | 1.19720400  |
| H | -1.28439900 | -1.55011900 | -0.76684000 |
| H | -1.51456700 | 1.18329100  | -0.61120100 |
| S | 1.62500000  | -1.74705900 | -0.06495200 |
| O | 2.49474900  | -3.05585900 | -0.03919200 |
| O | 2.25892200  | -0.95907300 | -1.19405200 |
| O | 0.28429300  | -2.14902000 | -0.39499600 |
| O | 1.85113600  | -1.10561700 | 1.19884400  |
| H | 2.13547100  | -3.69945900 | -0.66426200 |
| H | 2.33436100  | 0.08623200  | -0.99483800 |
| O | 0.75413400  | 3.22380900  | -1.04837100 |
| H | 0.93553700  | 3.03305100  | -1.97763000 |

239

240 (SA)<sub>2</sub>·A·FSA

| Atom | X           | Y           | Z           |
|------|-------------|-------------|-------------|
| N    | -0.37923500 | -1.61848700 | 0.51393000  |
| H    | -0.72962600 | -2.40970400 | 1.04954400  |
| H    | 0.61354800  | -1.73754800 | 0.24637300  |
| H    | -0.97316100 | -1.47534100 | -0.31706500 |
| S    | -0.23533500 | 1.63051300  | -0.41786400 |
| O    | -0.59344800 | 2.73170700  | -1.26140300 |
| O    | -1.27494000 | 1.13832600  | 0.51765900  |
| O    | 0.48704200  | 0.49589900  | -1.04079700 |
| C    | 1.47787000  | 1.52350300  | 1.56386900  |
| O    | 0.92242100  | 2.30063300  | 0.61194800  |
| H    | 2.24428000  | 2.09621900  | 2.09896000  |
| O    | 1.18910400  | 0.37975000  | 1.79207600  |
| H    | -0.43577500 | -0.75476800 | 1.07033400  |
| S    | 3.46041000  | -0.86448500 | -0.13695200 |
| O    | 2.35495100  | -1.80366900 | -0.11698500 |
| O    | 4.25092200  | -0.61065900 | 1.03805700  |
| O    | 2.97998300  | 0.49720400  | -0.72930600 |
| O    | 4.43249900  | -1.41597100 | -1.27920500 |
| H    | 1.98448300  | 0.47621100  | -0.98085100 |
| H    | 5.32608200  | -1.07672400 | -1.11191400 |
| S    | -3.72981600 | -0.75109400 | -0.18716200 |
| O    | -2.66648800 | -1.11059000 | -1.10242900 |
| O    | -5.07856600 | -1.19843800 | -0.37289200 |

|   |             |             |            |
|---|-------------|-------------|------------|
| O | -3.75240800 | 0.78833300  | 0.05631900 |
| O | -3.18410400 | -1.31740600 | 1.23325100 |
| H | -2.79817900 | 1.10930800  | 0.18164000 |
| H | -3.90410900 | -1.27914400 | 1.88357000 |

241

242 SA·A·(FSA)<sub>2</sub>

| Atom | X           | Y           | Z           |
|------|-------------|-------------|-------------|
| N    | -0.12726200 | -1.84684600 | -0.42365600 |
| H    | 0.30849300  | -1.60355300 | 0.47046200  |
| H    | -0.28726300 | -0.95610800 | -0.90261100 |
| H    | 0.51118100  | -2.42022500 | -0.96687400 |
| S    | -3.40300200 | -0.97176800 | -0.54312600 |
| O    | -4.70177800 | -0.85341600 | -1.09550800 |
| O    | -2.88019700 | -2.29154100 | -0.28317200 |
| O    | -2.36887300 | -0.11436700 | -1.18227100 |
| C    | -2.55236400 | -0.17279100 | 1.80472900  |
| O    | -3.58880700 | -0.26086200 | 0.95576800  |
| H    | -2.88968400 | 0.28121100  | 2.74123200  |
| O    | -1.43280000 | -0.52042400 | 1.58134300  |
| H    | -1.05776800 | -2.27053000 | -0.27560300 |
| S    | -0.25221100 | 2.13698400  | 0.04135500  |
| O    | 0.43061200  | 0.96247800  | -0.48801800 |
| O    | 0.04848200  | 2.56374800  | 1.36310400  |
| O    | -1.73585800 | 1.98059400  | -0.17501200 |
| O    | 0.16874700  | 3.28151800  | -0.96129200 |
| H    | -2.04361000 | 1.05180300  | -0.67223200 |
| H    | 0.08108400  | 4.14035300  | -0.52685300 |
| S    | 3.56124100  | -0.57648400 | -0.61780300 |
| O    | 4.82862700  | -0.50502300 | -1.23130200 |
| O    | 2.96657000  | 0.82490200  | -0.47074200 |
| O    | 2.56900100  | -1.51049300 | -1.04742500 |
| C    | 2.94634400  | -1.06786900 | 1.86862000  |
| O    | 3.92467600  | -0.93558800 | 0.94565400  |
| H    | 3.40228000  | -1.26938700 | 2.84190000  |
| O    | 1.77876500  | -0.97724300 | 1.66017700  |
| H    | 1.94844500  | 0.84432700  | -0.44116800 |

243

244 A·(FSA)<sub>3</sub>

| Atom | X           | Y           | Z          |
|------|-------------|-------------|------------|
| N    | -0.31846600 | -1.49948400 | 0.67567200 |
| H    | -1.00334800 | -2.06692100 | 0.16388500 |
| H    | -0.77180200 | -1.15287300 | 1.52238100 |
| H    | 0.54405300  | -2.00898400 | 0.86222200 |

|   |             |             |             |
|---|-------------|-------------|-------------|
| S | -3.42516100 | -0.19026100 | 0.29706900  |
| O | -4.27466000 | 0.93609500  | 0.38980700  |
| O | -2.28213200 | 0.00913100  | 0.69515100  |
| O | -2.97552600 | -0.87595500 | 1.46499600  |
| C | -3.74718800 | -2.48517100 | 0.88445500  |
| O | -4.29436800 | -1.29629000 | 0.56047200  |
| H | -4.49879900 | -3.09560300 | 1.39193400  |
| O | -2.62659800 | -2.82814200 | 0.66717500  |
| H | -0.06789300 | -0.67510200 | 0.10923100  |
| S | 0.26628700  | 2.09574900  | 0.91638700  |
| O | 1.03928000  | 2.96583600  | 1.72091300  |
| O | -1.18402100 | 2.17778300  | 1.04326400  |
| O | 0.70654400  | 0.68857800  | 0.88803900  |
| C | 0.00065800  | 2.05210700  | 1.67455700  |
| O | 0.58458700  | 2.63920000  | 0.61320300  |
| H | 0.33227000  | 2.55245000  | 2.58850500  |
| O | -0.75973100 | 1.13591700  | 1.63079200  |
| H | -1.89658100 | 0.98841500  | 0.80336800  |
| S | 3.48657100  | -1.27416200 | 0.43973400  |
| O | 4.62554500  | -1.84089600 | 1.04710800  |
| O | 3.11859600  | 0.03917700  | 1.11501600  |
| O | 2.32543100  | -2.06055300 | 0.15648600  |
| C | 3.25522000  | -0.10370000 | 1.87784200  |
| O | 4.06376600  | -0.74995200 | 1.01519600  |
| H | 3.83056200  | 0.17029600  | 2.76677800  |
| O | 2.10010100  | 0.13305200  | 1.70383000  |
| H | 2.13097500  | 0.32021800  | -1.00381200 |

245

246 (SA)<sub>3</sub>·(A)<sub>2</sub>

| Atom | X           | Y           | Z           |
|------|-------------|-------------|-------------|
| N    | 0.00518100  | -2.07016200 | 0.13235300  |
| H    | -0.75853200 | -2.16079900 | -0.55462500 |
| H    | 0.93474300  | -1.88806300 | -0.30515600 |
| H    | 0.03719300  | -2.89913000 | 0.71738900  |
| N    | -2.34720800 | 1.90536900  | 1.66490700  |
| H    | -3.28300000 | 2.15582800  | 1.35682500  |
| H    | -2.15626000 | 2.28748100  | 2.58494300  |
| H    | -2.28784300 | 0.86629500  | 1.66909200  |
| S    | -3.05154400 | -0.82064200 | -0.13076300 |
| O    | -2.54077100 | -1.86675900 | -0.99529000 |
| O    | -2.97918700 | 0.51386700  | -0.72804800 |
| O    | -2.49768700 | -0.83783600 | 1.22061400  |
| H    | -1.36657100 | 0.64835200  | -1.39460500 |

|   |             |             |             |
|---|-------------|-------------|-------------|
| S | 0.28837400  | 1.51641400  | -0.40036800 |
| O | -0.38382400 | 0.61467600  | -1.49818000 |
| O | 1.58674500  | 1.85904500  | -0.92585500 |
| O | -0.60465300 | 2.64712900  | -0.17390700 |
| O | 0.36418400  | 0.67575900  | 0.81966400  |
| H | -0.22309800 | -1.24829000 | 0.70426700  |
| H | -1.64624200 | 2.26948800  | 0.94588000  |
| O | -4.59477800 | -1.12522500 | 0.10609000  |
| H | -5.01675300 | -1.29530900 | -0.74583900 |
| S | 3.45174800  | -0.69237600 | 0.13959600  |
| O | 3.87133700  | 0.63659300  | -0.53293900 |
| O | 2.71916700  | -0.25160100 | 1.44404300  |
| O | 4.61983900  | -1.39864900 | 0.50930300  |
| O | 2.47134100  | -1.33631400 | -0.71283100 |
| H | 3.05627700  | 1.14908100  | -0.79026500 |
| H | 1.83331600  | 0.16880500  | 1.23453400  |

247

248 (SA)<sub>2</sub>· (A)<sub>2</sub>·FSA

| Atom | X           | Y           | Z           |
|------|-------------|-------------|-------------|
| S    | 2.40391200  | -1.07942500 | -0.36129600 |
| O    | 1.71053700  | -1.25313700 | -1.62432800 |
| O    | 3.93485000  | -1.39284600 | -0.64312600 |
| O    | 2.45422600  | 0.30895400  | 0.10438500  |
| O    | 1.97479500  | -1.98921100 | 0.68846800  |
| H    | 0.16014500  | -0.66201200 | -2.06959300 |
| H    | 4.02118800  | -2.30963400 | -0.93347400 |
| S    | 0.13090500  | 2.77099300  | 0.23948700  |
| O    | 0.52718100  | 2.22941500  | 1.51602800  |
| O    | 0.95491200  | 2.04616800  | -0.86784700 |
| O    | -1.32140800 | 2.28625400  | -0.08580200 |
| O    | 0.15960200  | 4.16954900  | 0.02567800  |
| H    | 0.71912300  | 0.51593200  | 2.14015500  |
| H    | 1.59722700  | 1.33912600  | -0.47051200 |
| N    | 0.82421100  | -0.40948600 | 2.59019800  |
| H    | 1.30829900  | -0.31796500 | 3.47661200  |
| H    | -0.09695100 | -0.84199200 | 2.70844700  |
| H    | 1.35056700  | -1.03668200 | 1.93661900  |
| N    | -0.54682000 | 0.00432200  | -2.44844900 |
| H    | -1.48253800 | -0.21180200 | -2.07199100 |
| H    | -0.26303100 | 0.93496800  | -2.12694200 |
| H    | -0.55070900 | -0.03008600 | -3.46270000 |
| S    | -1.51508900 | -1.52449700 | 0.46380600  |
| O    | -1.31946500 | -2.13805600 | 1.74464700  |

|   |             |             |             |
|---|-------------|-------------|-------------|
| O | -0.84361300 | -0.22355000 | 0.34583800  |
| O | -1.43521900 | -2.32475700 | -0.71761100 |
| C | -3.73537000 | -0.45623000 | -0.42866100 |
| O | -3.15087300 | -1.09347000 | 0.57740100  |
| H | -4.80124800 | -0.32047400 | -0.22130800 |
| O | -3.20123700 | -0.05980200 | -1.42839300 |
| H | -1.36154100 | 1.31689700  | 0.11975700  |

249

250 SA·(A)<sub>2</sub>·(FSA)<sub>2</sub>

| Atom | X           | Y           | Z           |
|------|-------------|-------------|-------------|
| N    | 0.88963900  | 0.53209400  | 2.15145900  |
| H    | 1.84966900  | 0.41081100  | 1.79133900  |
| H    | 0.83420700  | 0.13754200  | 3.08575900  |
| H    | 0.62595400  | 1.51890800  | 2.14764400  |
| S    | 2.05308100  | -1.52499800 | -0.28033400 |
| O    | 1.86208800  | -2.52535200 | -1.29162100 |
| O    | 1.56829600  | -0.21036900 | -0.69826200 |
| O    | 1.74324300  | -1.87586600 | 1.07550400  |
| C    | 4.24923600  | -0.40930500 | 0.52002400  |
| O    | 3.72193000  | -1.32633400 | -0.28834800 |
| H    | 5.33771900  | -0.39884700 | 0.41336200  |
| O    | 3.64710000  | 0.31648900  | 1.26178000  |
| H    | 0.22502200  | 0.02316400  | 1.53083500  |
| S    | -2.47028500 | -0.12945100 | 0.31801600  |
| O    | -2.80915800 | 1.05221100  | 1.08298300  |
| O    | -2.93186600 | -0.17716900 | -1.03705100 |
| O    | -1.09183800 | -0.56319500 | 0.51862600  |
| C    | -3.25017700 | -2.56141200 | 0.62325600  |
| O    | -3.35078200 | -1.31108700 | 1.10186400  |
| H    | -3.89023600 | -3.22717300 | 1.20973100  |
| O    | -2.57184200 | -2.91559000 | -0.29470100 |
| H    | -1.31172900 | -1.82703100 | -1.49415100 |
| N    | -0.68616600 | -1.32213500 | -2.13810800 |
| H    | -0.53976600 | -0.38179800 | -1.74321300 |
| H    | -1.13732600 | -1.23961000 | -3.04422900 |
| H    | 0.21823700  | -1.80568400 | -2.19540900 |
| S    | -0.06455200 | 2.72561200  | -0.53080200 |
| O    | -0.04785500 | 4.08602500  | -0.92213700 |
| O    | -0.64874400 | 1.72545900  | -1.38120900 |
| O    | -0.72154700 | 2.61421300  | 0.89639100  |
| O    | 1.39733200  | 2.30480600  | -0.18118300 |
| H    | -1.58974300 | 2.11178800  | 0.89308600  |
| H    | 1.53655800  | 1.33998700  | -0.39906800 |

251

252

(A)<sub>2</sub>·(FSA)<sub>3</sub>

| Atom | X           | Y           | Z           |
|------|-------------|-------------|-------------|
| N    | -0.11133900 | 0.24657900  | -2.28896400 |
| H    | 0.82895800  | -0.08629700 | -2.04773100 |
| H    | -0.18294700 | 1.22685200  | -1.99200100 |
| H    | -0.28175800 | 0.14911400  | -3.28384500 |
| S    | 0.08139700  | 2.06744100  | 0.56332000  |
| O    | -0.39544000 | 2.37514200  | 1.87256700  |
| O    | 0.51543200  | 0.65888700  | 0.41907100  |
| O    | -0.67437700 | 2.51594000  | -0.57506900 |
| C    | 2.29126000  | 2.79019200  | -0.60671400 |
| O    | 1.52064500  | 2.89950300  | 0.49399800  |
| H    | 3.16765500  | 3.43567800  | -0.49670300 |
| O    | 2.06737500  | 2.09492700  | -1.54901700 |
| H    | -0.80364500 | -0.30930700 | -1.72586000 |
| S    | -3.15708200 | -1.35264700 | -0.52722200 |
| O    | -3.67483200 | -2.14280200 | -1.59065400 |
| O    | -3.57688500 | -1.66484300 | 0.82116000  |
| O    | -1.72160600 | -1.05739200 | -0.59577100 |
| C    | -3.67905300 | 1.17348500  | -0.02743400 |
| O    | -3.85405900 | 0.14547100  | -0.86392000 |
| H    | -4.21642800 | 2.04886700  | -0.40686200 |
| O    | -3.04040600 | 1.16497000  | 0.98177900  |
| H    | -2.31472000 | -0.95063500 | 1.98048600  |
| N    | -1.36613600 | -0.58667900 | 2.17802500  |
| H    | -0.85635900 | -0.64272800 | 1.28578500  |
| H    | -0.87118200 | -1.13454600 | 2.87367000  |
| H    | -1.41779800 | 0.40307900  | 2.43147200  |
| S    | 3.20510500  | -1.11588600 | -0.33809600 |
| O    | 4.57086000  | -1.07250000 | -0.69183800 |
| O    | 2.87098500  | -0.02555500 | 0.67088900  |
| O    | 2.18193400  | -1.22709200 | -1.33181300 |
| C    | 2.00153200  | -2.76533200 | 1.30340800  |
| O    | 3.10048700  | -2.48276700 | 0.57126600  |
| H    | 2.13258000  | -3.74911100 | 1.76309100  |
| O    | 1.05323000  | -2.06021800 | 1.44114400  |
| H    | 1.85807900  | 0.24373200  | 0.62113600  |

253

254

(SA)<sub>3</sub>·(A)<sub>3</sub>

| Atom | X          | Y           | Z          |
|------|------------|-------------|------------|
| S    | 2.61550300 | -1.21713100 | 0.07787100 |
| O    | 1.50419700 | -2.11956500 | 0.33153900 |
| O    | 3.94552200 | -2.09812300 | 0.14786300 |

|   |             |             |             |
|---|-------------|-------------|-------------|
| O | 2.66374100  | -0.67863000 | -1.27165400 |
| H | 3.94723000  | -2.59642300 | 0.97400000  |
| S | -2.80519300 | -0.98920500 | -0.06753700 |
| O | -2.88751900 | 0.34179100  | 0.50484700  |
| O | -4.14297800 | -1.67881400 | 0.45755400  |
| O | -2.85144000 | -1.05270500 | -1.52017700 |
| H | -4.26188300 | -2.51704700 | -0.00442200 |
| S | -0.33046500 | 2.24661500  | 0.03312700  |
| O | 0.21614600  | 0.92532100  | -0.34071300 |
| O | -0.53745000 | 2.32266200  | 1.47103800  |
| O | -1.71152100 | 2.40034500  | -0.67450000 |
| O | 0.49429700  | 3.31883300  | -0.51434200 |
| H | 1.96174700  | 2.66009600  | -0.62515700 |
| O | 2.74348300  | -0.20042500 | 1.12633500  |
| N | -0.09442900 | -0.29203800 | 2.17408000  |
| N | 2.82992600  | 2.04774500  | -0.59450900 |
| N | -0.09600400 | -1.28903300 | -1.85188200 |
| H | 3.67861200  | 2.57105100  | -0.77685000 |
| H | 2.87821600  | 1.57373000  | 0.31751000  |
| H | 2.72943200  | 1.26102800  | -1.24862100 |
| H | -2.31296100 | 1.69948700  | -0.30930200 |
| H | 0.20493900  | -1.93442300 | -1.11044700 |
| H | 0.50390300  | -1.39420000 | -2.66253600 |
| H | -1.09902400 | -1.41255800 | -2.04950500 |
| H | 0.02767100  | -0.33907600 | -1.43743600 |
| H | 0.89281000  | -0.35062400 | 1.89832100  |
| H | -0.65647300 | -0.89341900 | 1.53205000  |
| H | -0.39668000 | 0.69889100  | 2.05200600  |
| H | -0.21685000 | -0.59772400 | 3.13279700  |
| O | -1.69080900 | -1.77318400 | 0.47325800  |

255

256 (SA)<sub>2</sub>·(A)<sub>3</sub>·FSA

| Atom | X           | Y           | Z           |
|------|-------------|-------------|-------------|
| S    | 2.54617000  | -1.61306500 | 0.17337400  |
| O    | 2.53073400  | -1.36697700 | -1.25655200 |
| O    | 3.45690900  | -2.91890000 | 0.29359500  |
| O    | 3.20340600  | -0.57689400 | 0.96273600  |
| O    | 1.24418100  | -1.98353300 | 0.72922600  |
| H    | -0.06330300 | -1.89373500 | -0.74184800 |
| H    | 3.48671000  | -3.19854000 | 1.21636200  |
| S    | 0.53066300  | 2.33941500  | -0.17921600 |
| O    | 0.17450500  | 2.49218600  | 1.22770400  |
| O    | 0.77296300  | 0.92495900  | -0.50459000 |

|   |             |             |             |
|---|-------------|-------------|-------------|
| O | -0.68640100 | 2.81865800  | -1.03655700 |
| O | 1.63632400  | 3.18459700  | -0.60929500 |
| H | 0.15632000  | 1.05760800  | 1.94961500  |
| H | 3.03934200  | 0.60258500  | -1.61078700 |
| N | 0.13954700  | 0.09425900  | 2.39442900  |
| H | 0.71510400  | 0.08969000  | 3.22966200  |
| H | -0.82844200 | -0.14317700 | 2.61268200  |
| H | 0.49563400  | -0.60542600 | 1.71987000  |
| N | -0.34546600 | -1.35648200 | -1.57066200 |
| H | -1.35760200 | -1.45842700 | -1.71549200 |
| H | -0.11532200 | -0.37569100 | -1.32520200 |
| H | 0.21126100  | -1.64797400 | -2.36726500 |
| S | -2.61335700 | -0.05628800 | 0.52624900  |
| O | -2.95163800 | 0.67828500  | 1.70612200  |
| O | -2.31535000 | 0.72497100  | -0.66244500 |
| O | -1.71447800 | -1.17225400 | 0.73835200  |
| C | -4.13486100 | -1.58315700 | -0.94138500 |
| O | -4.07585500 | -0.78824800 | 0.12364400  |
| H | -5.15461800 | -1.96391800 | -1.05876800 |
| O | -3.23553400 | -1.86575600 | -1.68171200 |
| H | -1.43543700 | 2.19580100  | -0.88160100 |
| N | 3.50117100  | 1.31384300  | -1.03524100 |
| H | 2.86161200  | 2.14900800  | -0.93597000 |
| H | 4.40902100  | 1.55980500  | -1.41211400 |
| H | 3.58837200  | 0.84024400  | -0.11885000 |

257

258 SA·(A<sub>3</sub>)<sub>2</sub>(FSA)<sub>2</sub>

| Atom | X           | Y           | Z           |
|------|-------------|-------------|-------------|
| N    | 0.83387200  | -0.43401100 | 2.18783400  |
| H    | 1.83389100  | -0.65793000 | 2.09210800  |
| H    | 0.55630300  | -0.36783400 | 3.16077200  |
| H    | 0.60144600  | 0.45302000  | 1.68709900  |
| S    | 2.70283700  | -0.48528200 | -0.63007100 |
| O    | 2.88110700  | -0.34723300 | -2.03825700 |
| O    | 2.72100500  | 0.72551700  | 0.16993400  |
| O    | 1.68179000  | -1.43461900 | -0.21621700 |
| C    | 4.33574600  | -1.55761700 | 1.10917500  |
| O    | 4.13897600  | -1.24754600 | -0.16631800 |
| H    | 5.31915900  | -2.02416100 | 1.22792800  |
| O    | 3.58011800  | -1.37482900 | 2.02297600  |
| H    | 0.27895200  | -1.14925000 | 1.70325800  |
| S    | -2.44346000 | -0.75224800 | 0.58884300  |
| O    | -2.78436500 | -0.16036100 | 1.85451000  |



|   |             |             |             |
|---|-------------|-------------|-------------|
| O | -2.67741800 | 0.09593000  | -0.56675100 |
| O | -1.21277000 | -1.50876600 | 0.54864300  |
| C | -3.63487700 | -2.70660000 | -0.65158100 |
| O | -3.62775700 | -1.93907500 | 0.44108300  |
| H | -4.45210500 | -3.43205200 | -0.58213000 |
| O | -2.88250100 | -2.63845300 | -1.57915900 |
| H | 0.25793400  | -1.47566400 | -1.39132900 |
| N | -0.38344300 | -1.06744000 | -2.08835900 |
| H | -0.41701600 | -0.04875900 | -1.86347800 |
| H | -1.31050300 | -1.49358200 | -1.99162100 |
| H | 0.00156300  | -1.19188200 | -3.01919000 |
| S | 0.00000200  | 2.38018500  | -0.34011300 |
| O | -0.91643900 | 3.50541100  | -0.51249300 |
| O | 0.12099600  | 1.52027000  | -1.50393100 |
| O | -0.32908200 | 1.63241100  | 0.88522400  |
| O | 1.39814700  | 3.05241500  | -0.12406800 |
| H | -2.61835800 | 2.10423700  | 1.57133600  |
| H | 2.06716500  | 2.33176000  | -0.11600600 |
| N | -3.00983500 | 2.53990000  | 0.73431700  |
| H | -2.23497100 | 3.10334500  | 0.26088200  |
| H | -3.83550100 | 3.08519800  | 0.95075400  |
| H | -3.22184200 | 1.74865900  | 0.10755200  |

259

260

(A)<sub>3</sub>·(FSA)<sub>3</sub>

| Atom | X           | Y           | Z           |
|------|-------------|-------------|-------------|
| N    | 0.43250300  | 0.17461100  | -1.90860200 |
| H    | 0.10701400  | 1.14755100  | -1.73877900 |
| H    | -0.31737800 | -0.45690900 | -1.59577500 |
| H    | 0.61293800  | 0.03033900  | -2.89673700 |
| S    | -2.25698800 | -1.81816200 | 0.04075300  |
| O    | -1.44494000 | -3.00259800 | -0.00029100 |
| O    | -2.33250900 | -1.17406200 | 1.33768600  |
| O    | -2.07128100 | -0.89108400 | -1.06173500 |
| C    | -4.85272000 | -1.67047200 | -0.27173300 |
| O    | -3.77813400 | -2.46023900 | -0.21420500 |
| H    | -5.74320400 | -2.28242200 | -0.44533700 |
| O    | -4.87464800 | -0.48030200 | -0.15658100 |
| H    | 1.30592500  | 0.00696000  | -1.37120700 |
| S    | 3.70101600  | -0.65750200 | 0.17026800  |
| O    | 5.07379000  | -0.31215000 | 0.26556000  |
| O    | 3.06031900  | -1.10038400 | 1.40161500  |
| O    | 2.85804500  | 0.21667100  | -0.62798700 |
| C    | 2.65607400  | -2.69384300 | -1.10528300 |

---

|   |             |             |             |
|---|-------------|-------------|-------------|
| O | 3.77598400  | -2.08121800 | -0.75588400 |
| H | 2.88569800  | -3.59050600 | -1.69151400 |
| O | 1.53798100  | -2.34265500 | -0.83717600 |
| H | 1.53197900  | -1.72176300 | 1.60556600  |
| N | 0.51467200  | -1.88462600 | 1.79271000  |
| H | 0.04921600  | -0.97118800 | 1.69558700  |
| H | 0.35394200  | -2.25282500 | 2.72446000  |
| H | 0.10351400  | -2.51521000 | 1.09235900  |
| S | -0.28232600 | 3.53522200  | -0.18513700 |
| O | 0.32545100  | 4.72113900  | -0.67222700 |
| O | -1.23090200 | 3.63661400  | 0.89519200  |
| O | -0.70156900 | 2.56942900  | -1.21050900 |
| C | 0.96933200  | 1.56572600  | 1.06846000  |
| O | 1.05910300  | 2.76585000  | 0.54378400  |
| H | 1.89157400  | 1.30031300  | 1.59196500  |
| O | 0.01410300  | 0.82215900  | 0.99078000  |
| H | -2.19413900 | 1.68039600  | -0.42187000 |
| N | -2.81105700 | 1.45973500  | 0.37213500  |
| H | -2.96880000 | 2.33503000  | 0.86744900  |
| H | -2.29677800 | 0.80508800  | 0.97083100  |
| H | -3.66401200 | 0.97836400  | 0.07232500  |

---

261

262
